# Supplementary material for: Iflavirus increases its infectivity and physical stability in association with baculovirus
Source: PeerJ. 2016 Mar 3;4:e1687. doi: 10.7717/peerj.1687 (PMC4782719; doi:10.7717/peerj.1687)
Supplement: Supplemental Information 1 [file peerj-04-1687-s001.xlsx]

## Sheet: SeIV1_tilling
# PI (persistent infection) VF (virus free)
# RC and Til (correspond to the negative and positive strand, respectively. The number refers to the nucleotide position of the 60 mers probe)
#NAMES	Pl_a	Pl_b	Pl_c	VF_a	VF_b	VF_c
SeIV_RC_1	1.54475	1.61859	4.17552	1.5302	1.66528	1.6496
SeIV_RC_10037	3.42557	2.61845	3.84597	2.69302	1.43064	2.25493
SeIV_RC_10097	8.86734	6.81032	9.96965	1.42642	1.49661	1.52318
SeIV_RC_10183	9.04322	7.22719	9.999	1.52182	1.41769	1.41282
SeIV_RC_1021	7.06505	7.94015	6.88812	1.70587	1.65543	2.13657
SeIV_RC_10243	5.64645	2.38934	6.63365	1.6322	2.11044	1.55793
SeIV_RC_1081	6.97877	6.90583	7.36911	1.64258	1.51889	1.52721
SeIV_RC_1141	6.43377	5.65229	6.70836	1.60719	1.41525	1.38298
SeIV_RC_1201	7.00851	6.40525	6.88775	2.34128	2.71463	1.61188
SeIV_RC_121	2.25715	3.26074	3.1183	1.45663	1.61861	1.52964
SeIV_RC_1261	8.66528	7.97894	8.46911	1.48084	1.49703	1.56716
SeIV_RC_1321	9.15157	8.10936	9.55808	1.62702	1.39272	4.86773
SeIV_RC_1381	7.56525	7.58009	7.25089	1.4472	1.45647	1.46394
SeIV_RC_1463	8.69585	7.51725	8.31169	1.41451	2.22226	1.48086
SeIV_RC_1523	6.20209	6.35705	5.86954	1.49915	2.9723	1.46741
SeIV_RC_1583	8.1398	7.89365	7.94372	1.6145	2.46854	1.48444
SeIV_RC_1643	8.53589	7.65258	8.13503	1.49237	1.81254	1.41306
SeIV_RC_1703	9.63684	8.34437	9.66838	1.68098	2.22609	2.10773
SeIV_RC_1763	10.2058	7.93866	11.0447	1.40696	1.41955	1.50285
SeIV_RC_181	4.14403	5.05603	3.97074	1.68535	1.72381	3.06848
SeIV_RC_1823	9.94609	8.61809	10.1169	1.44987	1.63294	1.51937
SeIV_RC_1883	10.9417	8.9967	11.89	2.63825	1.51577	1.87958
SeIV_RC_1943	10.8121	9.08971	10.9202	1.51618	1.50556	1.54849
SeIV_RC_2003	10.2928	8.07254	10.722	1.96495	3.10462	3.48155
SeIV_RC_2063	10.081	8.46931	10.1317	1.53996	1.58731	1.57382
SeIV_RC_2123	9.96824	8.38782	10.1117	1.52589	1.53012	1.60228
SeIV_RC_2183	9.98071	8.3302	10.3494	1.49964	1.51264	1.53703
SeIV_RC_2243	10.1777	8.06294	11.0651	1.38256	1.40317	1.4499
SeIV_RC_2303	10.5013	8.63074	10.9736	1.94676	3.09827	1.45499
SeIV_RC_2363	7.81959	6.27089	7.48691	1.46395	1.4842	1.59479
SeIV_RC_241	1.46168	1.41063	1.44693	1.4997	1.42029	1.40806
SeIV_RC_2423	10.7635	8.7862	11.4948	1.70358	1.55186	1.53438
SeIV_RC_2483	10.8456	8.47856	11.97	1.49798	1.48918	1.52352
SeIV_RC_2543	10.1645	8.00598	10.9526	1.65639	1.39494	1.41708
SeIV_RC_2603	10.221	7.99583	10.8182	1.50917	1.5313	1.55138
SeIV_RC_2663	10.6971	8.38071	11.5149	1.81254	3.55958	3.05775
SeIV_RC_2723	11.1984	8.94721	12.524	1.50761	1.42976	1.42839
SeIV_RC_2783	9.90977	7.75633	10.6731	1.59684	1.57406	1.49055
SeIV_RC_2843	11.3343	8.98232	12.7689	1.46727	1.37688	1.40448
SeIV_RC_2903	11.0011	8.91884	11.9807	1.53151	3.44236	3.18021
SeIV_RC_2963	9.71582	7.35176	10.6683	1.4335	1.50342	1.47894
SeIV_RC_301	2.50765	3.33652	2.62757	1.44744	2.23362	1.46515
SeIV_RC_3023	10.4681	8.27114	11.5757	1.69432	1.51045	1.51076
SeIV_RC_3083	11.3492	9.34435	12.4232	1.4903	1.32048	1.33857
SeIV_RC_3143	10.4789	8.56709	11.5133	1.6249	1.4656	1.42292
SeIV_RC_3203	9.90766	7.71288	10.825	2.99844	1.47021	1.44648
SeIV_RC_3263	10.1346	7.84713	11.0982	2.14192	3.19973	1.26186
SeIV_RC_3323	11.4277	8.83604	12.9324	4.06678	4.03098	3.87829
SeIV_RC_3383	11.6604	9.31588	13.3751	1.41387	2.78126	1.6218
SeIV_RC_3443	8.54625	5.9556	9.98676	1.44803	1.91629	1.48084
SeIV_RC_3503	9.98707	7.69051	11.6686	1.58189	1.41561	1.38044
SeIV_RC_3563	9.21598	6.96174	10.6369	1.77125	1.56275	1.40857
SeIV_RC_361	7.49696	8.44055	6.81607	2.28496	2.90984	3.19533
SeIV_RC_3623	11.8194	9.52519	13.5356	2.81185	1.41564	1.41311
SeIV_RC_3683	11.3937	9.05328	13.0543	1.79099	1.50867	1.59586
SeIV_RC_3743	11.0565	8.83117	12.8167	1.42947	2.71307	1.67928
SeIV_RC_3803	11.0598	8.42238	12.8996	2.52001	3.48118	3.06225
SeIV_RC_3863	11.3379	9.31473	12.9825	2.13514	3.38673	1.48009
SeIV_RC_3923	9.61432	7.73727	11.5781	1.37881	1.38398	1.42049
SeIV_RC_3983	4.67202	6.99699	4.1472	1.44992	1.54071	1.49385
SeIV_RC_4043	7.16565	8.13405	6.44664	1.61642	1.61423	1.66941
SeIV_RC_4103	6.55958	7.77329	5.89146	2.03543	3.25403	1.59955
SeIV_RC_4163	7.73965	7.87209	6.87388	1.43446	1.50756	1.32684
SeIV_RC_421	7.91556	8.80339	7.47566	1.50618	1.65664	1.48898
SeIV_RC_4223	8.06346	8.53058	7.70365	1.71657	1.68717	1.82142
SeIV_RC_4283	5.86166	5.86017	5.13252	1.57987	1.94923	1.44635
SeIV_RC_4343	9.56723	9.17359	9.2758	1.38012	3.56742	1.44396
SeIV_RC_4403	9.12297	8.36352	8.78241	1.53815	1.52194	1.59306
SeIV_RC_4463	10.7677	9.4581	10.5708	1.42173	2.71867	2.20913
SeIV_RC_4523	8.48129	7.66565	8.07929	1.44038	1.45681	1.44133
SeIV_RC_4583	10.1879	8.60304	10.0172	1.54417	1.55071	1.64241
SeIV_RC_4643	10.8514	9.28943	10.9198	1.47176	1.43527	1.45625
SeIV_RC_4703	8.8387	8.57746	8.6377	1.7147	1.39379	1.41071
SeIV_RC_4763	8.67652	8.20913	8.06028	3.60492	2.17684	2.56144
SeIV_RC_481	8.07	9.03572	8.01026	1.46052	1.27689	1.28418
SeIV_RC_4823	8.74206	6.63989	9.37465	1.63777	1.42776	1.39934
SeIV_RC_4883	10.5438	8.76108	10.8558	1.67164	1.36787	1.39018
SeIV_RC_4943	10.3009	8.95578	10.2122	1.68669	1.40122	1.41861
SeIV_RC_5003	10.5631	8.15846	11.9478	1.65549	1.47338	1.44813
SeIV_RC_5063	6.66473	4.72854	6.71145	1.4184	1.4562	1.89754
SeIV_RC_5123	10.2239	8.77236	10.3107	1.59968	1.88629	1.46048
SeIV_RC_5183	10.8574	9.15157	11.2627	1.42976	1.44305	1.55089
SeIV_RC_5243	7.40402	5.46957	7.82555	1.40791	1.41541	1.43592
SeIV_RC_5303	9.89439	7.89567	10.4789	1.71276	1.32113	1.40929
SeIV_RC_5363	10.1106	8.39068	10.4692	1.62004	1.52954	1.53391
SeIV_RC_541	6.1237	7.23684	5.67371	1.40246	3.12847	1.83077
SeIV_RC_5423	10.2955	8.28938	10.662	1.66025	2.71415	3.50705
SeIV_RC_5483	11.5049	9.22759	12.5914	1.41257	2.45246	1.50837
SeIV_RC_5543	10.6915	8.46516	11.4389	1.56614	2.17053	1.52516
SeIV_RC_5603	11.1844	9.00609	12.2634	1.62269	1.64648	1.36605
SeIV_RC_5663	11.0106	8.9111	11.9765	3.80773	3.82494	3.26546
SeIV_RC_5723	10.6669	8.55271	11.2428	1.3432	1.4699	1.36863
SeIV_RC_5783	9.97127	8.31732	10.3928	1.52879	2.87317	1.91993
SeIV_RC_5843	11.0054	8.88481	12.1688	1.52266	1.58102	1.57148
SeIV_RC_5903	7.8725	5.38713	8.75311	1.54137	1.73288	1.49041
SeIV_RC_5963	10.6346	8.81761	11.2645	1.4682	1.41036	3.53172
SeIV_RC_601	7.25129	8.24413	6.6099	1.4323	1.49047	1.51807
SeIV_RC_6023	10.2081	8.22042	10.7492	1.82224	2.84038	1.8453
SeIV_RC_6083	10.0483	7.85128	10.8217	1.43085	1.421	1.43958
SeIV_RC_61	1.46091	3.8231	1.45838	1.40985	1.47521	1.44668
SeIV_RC_6143	10.3595	7.77364	11.5921	1.57456	1.60264	1.53684
SeIV_RC_6203	10.9935	8.76488	12.3083	1.49033	1.99185	1.45939
SeIV_RC_6263	10.0092	7.74809	11.2564	1.48746	1.64223	1.49141
SeIV_RC_6323	10.2698	7.79069	11.5478	1.86683	2.50956	2.40999
SeIV_RC_6383	10.6015	7.89036	12.1944	2.11272	1.53554	1.53441
SeIV_RC_6443	9.00686	6.6865	10.3734	1.39242	1.42651	2.08206
SeIV_RC_6503	4.10243	2.41407	4.21853	1.5156	1.70679	1.48754
SeIV_RC_6563	9.03111	7.20607	8.97316	1.6255	1.53271	1.53766
SeIV_RC_661	9.55533	9.75456	9.29831	3.87766	3.79403	2.72063
SeIV_RC_6623	10.6829	8.89895	10.9984	1.45519	1.55146	1.48784
SeIV_RC_6683	10.0309	7.94181	10.4568	1.53634	1.43956	1.4384
SeIV_RC_6743	7.12097	4.99539	7.00676	1.68646	1.51369	2.21606
SeIV_RC_6803	11.0975	8.91187	11.9903	1.62608	1.79859	1.75306
SeIV_RC_6863	10.5771	7.92242	12.032	1.52427	1.55852	1.59248
SeIV_RC_6923	9.41957	6.99318	10.6197	1.42518	1.68546	1.5371
SeIV_RC_6983	10.7009	8.62909	11.4732	1.42689	1.51604	1.46578
SeIV_RC_7043	11.0843	8.85803	12.2257	1.67076	1.69972	1.78676
SeIV_RC_7103	10.0031	7.49281	11.1333	1.47708	2.70288	1.54186
SeIV_RC_7163	10.9032	8.36823	12.3944	1.58773	1.61579	1.66177
SeIV_RC_721	8.79891	9.32981	8.54201	1.81452	1.47559	1.51028
SeIV_RC_7223	11.144	8.79704	12.8152	3.04382	4.14626	4.55297
SeIV_RC_7283	9.1355	6.73285	10.2158	1.62236	1.50265	1.48372
SeIV_RC_7343	8.11547	5.65662	9.3359	1.38732	1.41306	1.47476
SeIV_RC_7403	10.1085	7.48493	11.7584	1.44423	1.46141	1.44336
SeIV_RC_7463	9.3322	7.1869	10.8546	1.71465	1.3784	1.40332
SeIV_RC_7497	10.4963	9.0005	10.9446	1.55573	1.47331	1.44259
SeIV_RC_7558	10.9563	8.97049	11.683	1.80622	1.54336	1.55719
SeIV_RC_7618	11.3073	9.0007	12.7505	1.92527	3.55631	2.95564
SeIV_RC_7678	10.0417	8.10254	10.7199	2.3235	1.39275	1.42043
SeIV_RC_7738	10.8901	8.70032	12.2414	1.52008	1.57249	1.5767
SeIV_RC_7798	10.7258	8.54416	12.2744	1.49961	1.56425	3.04298
SeIV_RC_781	4.21671	6.20249	4.21456	1.45528	1.38213	1.41122
SeIV_RC_7858	10.5417	8.14522	10.3188	1.89028	1.44091	1.54618
SeIV_RC_7918	11.1886	8.7245	12.873	2.06009	1.5271	2.06342
SeIV_RC_7978	9.29673	6.80171	11.1302	1.42163	1.477	1.48085
SeIV_RC_8038	10.0813	7.69474	11.6797	1.69725	1.51869	1.61719
SeIV_RC_8098	8.26589	5.62793	9.86529	1.84957	1.27279	2.81
SeIV_RC_8158	11.3048	9.14822	12.9424	2.29288	2.9506	1.61832
SeIV_RC_8218	11.612	9.07511	13.3464	1.44117	2.86395	2.70256
SeIV_RC_8278	10.4029	8.00726	12.2278	1.47187	1.53077	1.46999
SeIV_RC_8338	11.8406	9.61252	13.7441	1.52797	1.58198	1.50166
SeIV_RC_8398	11.0965	8.57922	13.1554	1.47105	1.66112	1.51967
SeIV_RC_841	6.18003	7.28698	5.97026	2.3437	3.10745	2.899
SeIV_RC_8458	11.572	9.42303	13.4069	3.43692	4.29394	3.86333
SeIV_RC_8518	7.0575	4.90272	8.80052	1.48429	1.50571	1.46914
SeIV_RC_8578	11.2667	9.30787	13.3456	2.60912	2.5568	2.21985
SeIV_RC_8626	10.8697	8.61295	12.7939	1.54793	1.48099	1.45631
SeIV_RC_8701	8.14793	8.11547	7.43747	1.40965	1.72619	1.46088
SeIV_RC_8761	8.07401	8.65107	7.50282	1.4519	1.72409	1.51389
SeIV_RC_8821	6.88175	7.99892	6.43734	2.39903	1.47051	1.44837
SeIV_RC_8881	6.64845	7.49497	6.23576	1.34908	1.66551	1.40002
SeIV_RC_8941	6.90734	7.33799	7.00271	1.54628	1.56906	1.58476
SeIV_RC_9001	6.80676	7.35872	6.60529	1.49858	1.39224	1.40575
SeIV_RC_901	7.1858	7.93964	7.29612	1.54704	1.63529	1.66019
SeIV_RC_9061	7.11817	7.49666	6.94672	1.58938	1.61435	1.65777
SeIV_RC_9121	8.60147	8.33861	8.32408	1.43772	2.04895	1.45457
SeIV_RC_9155	7.26372	7.79859	7.18052	1.5594	1.49529	1.47282
SeIV_RC_9216	6.57586	7.2223	6.39364	1.73222	1.43481	1.53068
SeIV_RC_9276	6.33827	7.13942	6.03124	1.46813	2.08099	1.43721
SeIV_RC_9333	7.2405	7.82535	7.36785	1.42271	1.43325	1.53653
SeIV_RC_9394	6.8823	7.5472	7.34282	1.42692	1.43679	1.53724
SeIV_RC_9454	7.78511	8.08347	8.2717	1.33381	1.50837	1.36905
SeIV_RC_9520	9.3794	9.54353	9.70539	1.45831	1.76645	1.51377
SeIV_RC_9580	6.93338	7.68018	6.85067	1.64681	1.44796	1.46879
SeIV_RC_961	8.29973	8.42731	8.15013	4.47319	4.215	3.36821
SeIV_RC_9640	7.04137	7.66161	7.12097	1.80239	1.41338	1.48391
SeIV_RC_9700	5.90032	6.59363	5.93362	2.26801	3.39709	2.43793
SeIV_RC_9760	6.65817	7.31875	6.81768	2.57912	1.47333	3.4135
SeIV_RC_9857	7.12705	7.7942	7.40839	1.35665	1.50997	1.38603
SeIV_RC_9917	7.78776	7.85519	8.29499	1.46062	1.60508	1.52609
SeIV_RC_9977	8.99533	8.05341	9.59608	1.50261	1.41938	1.40708
SeIV_Til_1	12.3186	9.21862	13.9974	1.43067	1.48933	1.51361
SeIV_Til_10029	14.1634	13.8222	14.359	4.26098	1.45718	2.42425
SeIV_Til_10089	16.5884	16.4746	16.505	6.03061	4.17653	5.30982
SeIV_Til_10149	14.4693	13.6131	14.7303	3.28902	1.5151	1.47947
SeIV_Til_1018	16.417	13.7801	17.0187	1.3851	1.47001	1.43237
SeIV_Til_10209	14.1745	13.8297	14.3483	5.30693	3.26798	4.28722
SeIV_Til_10269	16.8949	16.9199	16.8107	8.09487	6.14664	6.31773
SeIV_Til_1075	15.4411	13.0301	15.9944	1.52454	1.46417	1.51271
SeIV_Til_108	12.6928	9.86263	14.1908	1.37429	1.55144	1.41257
SeIV_Til_1136	15.5073	13.158	15.9663	1.79556	1.3775	1.4032
SeIV_Til_1196	16.2466	13.5871	16.7512	2.2758	1.44156	1.87798
SeIV_Til_1256	15.0453	12.6405	16.0218	1.47379	1.44067	1.43583
SeIV_Til_1316	16.1787	13.6029	16.6504	1.49759	1.42815	1.44256
SeIV_Til_1376	16.0454	13.4903	16.7668	1.35395	1.50285	1.38217
SeIV_Til_1436	17.0022	14.7808	17.3511	2.5641	1.50797	1.58231
SeIV_Til_1496	16.7763	14.8808	16.83	2.7519	2.14322	1.53657
SeIV_Til_1556	16.5855	14.54	16.9199	3.1049	1.69375	2.30823
SeIV_Til_1590	16.342	14.291	16.6822	3.05138	2.52072	2.69897
SeIV_Til_1665	12.6714	10.0442	12.9545	1.53737	1.42953	1.42022
SeIV_Til_169	12.4775	9.52561	14.0508	1.53102	1.53647	1.60521
SeIV_Til_1725	13.1641	10.5314	13.2096	3.07246	3.37799	4.51037
SeIV_Til_1785	7.61527	4.73932	8.37052	4.77137	1.37874	1.40677
SeIV_Til_1845	12.8655	10.6078	13.6749	8.34014	8.5899	8.39972
SeIV_Til_1905	12.1189	9.1236	13.1037	1.49938	1.40131	1.40885
SeIV_Til_1965	11.5544	8.66348	12.4426	1.52099	1.5625	1.56431
SeIV_Til_2025	11.4209	8.6246	12.3094	1.42011	1.44734	1.43631
SeIV_Til_2085	12.3531	9.44653	13.6002	1.40151	1.39456	1.42192
SeIV_Til_2145	12.4021	9.72955	13.6957	2.34742	2.57449	1.38271
SeIV_Til_2205	10.5959	7.46929	12.0459	1.42673	1.41368	1.43369
SeIV_Til_2265	11.649	8.76798	12.9417	1.40931	1.48258	1.4727
SeIV_Til_229	4.55166	1.45795	6.5	1.49373	1.42297	1.43705
SeIV_Til_2325	9.90462	7.02894	11.1673	1.53821	1.40777	1.38398
SeIV_Til_2385	12.4703	9.75647	14.1804	1.48812	1.74173	1.62277
SeIV_Til_2445	11.9583	9.2339	12.4586	1.46028	1.4212	1.44174
SeIV_Til_2505	10.921	8.27301	12.1497	1.57877	1.38223	1.42374
SeIV_Til_2565	11.4806	8.80236	12.8602	1.52679	1.95275	1.45681
SeIV_Til_2625	12.3941	9.72503	13.9318	3.46083	1.87055	1.48381
SeIV_Til_2685	12.7145	10.0875	14.4942	1.61258	2.16156	2.31664
SeIV_Til_2733	11.9601	9.35609	13.7158	1.44442	1.46311	1.57178
SeIV_Til_2794	13.2705	10.908	14.9766	1.46044	1.57087	1.49744
SeIV_Til_2854	11.2178	8.36501	12.602	1.46203	1.44621	1.46467
SeIV_Til_289	10.2926	7.31383	11.1322	1.45694	1.437	1.43551
SeIV_Til_2914	10.7247	7.91517	12.485	1.49195	1.35996	1.38203
SeIV_Til_2974	10.3771	7.45355	11.9184	1.39703	1.441	1.45647
SeIV_Til_3034	12.1384	9.51371	13.9767	2.65656	3.23463	3.13821
SeIV_Til_3094	12.1444	9.40317	13.8345	1.36559	1.38335	5.57265
SeIV_Til_3154	12.4796	9.7027	14.3375	1.45597	1.83829	1.49998
SeIV_Til_3214	11.4533	8.6206	13.1328	1.98395	1.41506	1.43441
SeIV_Til_3274	12.5712	9.80856	14.4981	1.62629	4.60016	1.71636
SeIV_Til_3334	11.9175	8.91624	13.7397	1.47465	1.59499	1.36114
SeIV_Til_3394	11.8601	9.1464	13.8404	1.50813	1.5405	1.49013
SeIV_Til_3454	12.1841	9.28589	13.9602	2.13011	1.36423	2.24449
SeIV_Til_349	14.2074	11.4825	15.1801	1.39568	1.4533	1.45071
SeIV_Til_3514	13.3876	10.8258	15.4008	1.54967	1.55402	1.64176
SeIV_Til_3574	11.3967	8.75081	14.6737	1.42418	1.39157	2.02191
SeIV_Til_3634	13.38	10.9056	15.2479	1.5238	1.56943	1.56593
SeIV_Til_3694	14.6037	12.1732	16.4943	2.88492	1.50195	2.18207
SeIV_Til_3754	11.8638	9.39648	13.2993	1.53747	1.5525	1.58382
SeIV_Til_3814	12.2264	9.90149	13.1721	1.49144	1.49441	1.52263
SeIV_Til_3874	10.9211	7.96966	12.4129	1.54211	1.46731	1.49045
SeIV_Til_3934	11.8528	8.87875	13.8047	1.3986	1.45061	1.44673
SeIV_Til_3994	11.9274	8.96671	13.679	1.6496	1.63873	1.71928
SeIV_Til_4054	12.4492	9.48413	14.1818	1.44265	1.4607	1.51354
SeIV_Til_409	15.4267	12.7025	16.5913	1.39361	2.1728	1.42111
SeIV_Til_4114	12.6417	9.82533	14.1815	1.54463	1.52099	3.95813
SeIV_Til_4174	12.3089	9.32897	14.1654	1.45433	1.41721	1.421
SeIV_Til_4234	11.2744	8.29272	13.0391	1.71541	1.48823	1.54819
SeIV_Til_4294	13.1317	10.319	14.8411	1.36955	1.40906	1.43433
SeIV_Til_434	15.7698	13.0691	16.6768	1.56844	1.42037	1.43824
SeIV_Til_4354	12.4614	9.63073	14.2131	1.5605	1.77002	1.49638
SeIV_Til_4414	9.87402	6.75837	11.5538	1.4974	1.51925	1.53514
SeIV_Til_4474	13.0536	10.3147	14.9683	1.4396	1.92741	2.40862
SeIV_Til_4534	13.0645	10.2222	14.8607	1.51741	1.37167	1.38199
SeIV_Til_4594	13.3246	10.2385	15.0195	6.66534	6.08268	6.15598
SeIV_Til_4654	12.9117	10.0056	14.6166	5.59468	5.86602	5.85002
SeIV_Til_4714	12.806	9.95183	14.5281	1.36611	1.47646	1.39659
SeIV_Til_4774	12.7271	9.80294	14.4216	1.42687	1.40863	1.42088
SeIV_Til_4834	13.5828	10.9849	15.6402	1.87469	1.49522	1.53924
SeIV_Til_4894	13.3103	10.6072	14.9618	2.90549	1.57284	2.00216
SeIV_Til_4954	14.153	11.3972	16.1027	1.56366	1.78171	1.49703
SeIV_Til_5014	9.70147	6.20321	11.4328	1.51418	1.52397	1.59421
SeIV_Til_5074	12.0653	8.85047	13.8222	1.41569	3.01112	1.45042
SeIV_Til_5134	13.563	10.3329	15.5874	1.43523	1.45785	2.09231
SeIV_Til_5194	13.664	10.3658	15.7124	1.46187	1.52696	1.46646
SeIV_Til_523	15.1185	12.4757	16.4078	1.62345	1.75168	1.73967
SeIV_Til_5254	10.3972	6.86373	11.7244	1.49684	1.33	1.34952
SeIV_Til_5314	12.9234	9.50622	14.8678	1.45677	1.46908	1.47536
SeIV_Til_5374	14.2137	10.9905	15.9816	1.44932	1.51073	1.45967
SeIV_Til_5434	13.4881	10.2371	15.1148	1.4187	1.39973	1.42439
SeIV_Til_5494	5.78355	1.57824	7.74037	1.68935	1.60082	1.57991
SeIV_Til_5554	14.6476	11.297	16.6011	1.63652	1.47146	1.48924
SeIV_Til_5614	14.7015	11.3454	16.7301	1.57221	1.59041	1.64593
SeIV_Til_5674	14.6285	11.5424	16.2939	2.35805	1.3252	1.34873
SeIV_Til_5734	14.4802	11.3784	16.0832	1.62935	1.49581	1.59198
SeIV_Til_5794	13.5041	10.379	14.8722	2.93899	1.366	1.39085
SeIV_Til_583	15.5045	12.6644	16.7127	1.56584	1.54937	1.5279
SeIV_Til_5854	14.9586	11.6175	16.866	2.9992	3.71021	3.05105
SeIV_Til_5914	15.3108	12.0842	16.5516	1.48657	1.33434	1.34449
SeIV_Til_5974	16.0713	12.6136	16.9067	1.47719	1.48947	1.50626
SeIV_Til_6034	14.6912	11.4307	15.5355	1.53027	1.54596	1.59775
SeIV_Til_6094	16.1027	12.7641	16.721	1.8568	2.26102	1.34523
SeIV_Til_61	11.9799	8.84571	13.5718	1.42989	1.43634	1.45063
SeIV_Til_6154	15.1964	12.1287	16.223	1.48639	1.36034	1.37427
SeIV_Til_6214	17.1002	14.4842	17.4106	3.70427	1.49605	3.32305
SeIV_Til_6274	16.7301	14.4377	16.8182	2.73699	1.40972	1.78754
SeIV_Til_6334	15.213	13.3456	15.2825	1.46853	1.57189	1.4818
SeIV_Til_6394	11.2407	8.67358	13.0409	3.80421	3.7197	3.26495
SeIV_Til_643	14.8062	12.1209	16.2109	1.63782	1.37569	1.94711
SeIV_Til_6454	12.1087	9.49383	13.6523	5.45146	4.42031	3.56742
SeIV_Til_6514	11.5958	8.73469	13.2487	1.75339	2.80804	1.49264
SeIV_Til_6574	11.4215	8.82521	13.0933	1.33324	1.9238	1.40086
SeIV_Til_6634	11.151	8.31831	12.3936	1.52622	1.46597	1.54046
SeIV_Til_6694	12.3516	9.55737	13.8381	3.04176	2.20517	1.55906
SeIV_Til_6754	10.3471	7.32863	11.7488	1.57231	1.46142	1.41498
SeIV_Til_6814	11.7098	8.73324	13.2648	1.44467	1.51722	1.46574
SeIV_Til_6874	9.89138	7.09385	11.4527	1.37824	1.3847	1.4164
SeIV_Til_6934	12.9337	10.4422	14.8557	6.70214	6.70033	6.44795
SeIV_Til_6994	12.5514	9.59344	14.1924	1.33724	1.48368	1.36198
SeIV_Til_703	16.0262	13.2041	16.748	1.93521	1.41008	1.88887
SeIV_Til_7054	12.0012	9.13791	13.3838	1.43723	1.41378	1.43462
SeIV_Til_7114	12.1836	9.37978	13.5465	1.47939	1.4999	1.54149
SeIV_Til_7174	12.5087	9.8079	14.0828	1.48988	2.25349	1.87323
SeIV_Til_7234	12.7326	9.88338	14.4722	2.34984	2.33067	2.9874
SeIV_Til_7294	10.9798	7.9781	12.6117	1.42944	1.50312	1.48327
SeIV_Til_7354	12.8815	10.0873	14.5968	1.42858	1.47078	1.54129
SeIV_Til_7414	13.4704	10.6934	15.4067	1.5122	1.52202	1.62357
SeIV_Til_7474	12.8107	10.086	14.5103	2.55915	1.41471	1.41365
SeIV_Til_7534	12.4196	9.69425	13.9677	1.58665	1.71985	1.70202
SeIV_Til_7594	13.0564	10.2301	14.7667	1.54875	1.55035	1.63854
SeIV_Til_763	16.1852	13.3728	16.764	3.40288	1.50205	2.00275
SeIV_Til_7654	14.0057	11.1955	15.8257	1.4819	1.50006	1.55115
SeIV_Til_7714	13.1328	10.3273	14.7435	1.49654	1.42098	1.58485
SeIV_Til_7774	12.3012	9.48156	14.0184	1.52785	1.41539	1.39374
SeIV_Til_7834	13.3378	10.6281	15.3359	1.27402	1.49028	2.46772
SeIV_Til_7894	13.6749	10.8406	15.5214	1.47328	1.49561	1.53166
SeIV_Til_7954	13.6991	10.8492	15.7576	1.40482	1.40427	1.42698
SeIV_Til_8014	14.0102	11.0621	16.15	2.48492	2.33399	2.64748
SeIV_Til_8074	13.9323	11.0727	15.9405	1.3217	2.03114	1.35296
SeIV_Til_8134	14.0619	11.2615	16.0235	1.43347	1.68126	1.8806
SeIV_Til_8194	14.5452	11.7393	16.3056	1.40941	1.41195	1.43181
SeIV_Til_8254	14.6313	11.8013	16.6262	2.91437	2.80371	2.03234
SeIV_Til_8314	14.1312	11.2562	15.9231	1.42072	5.28178	1.51181
SeIV_Til_832	13.7441	11.5811	13.9749	1.31456	1.47737	1.3217
SeIV_Til_8374	14.5294	11.6975	16.6551	1.64199	1.57366	1.56271
SeIV_Til_8434	14.8256	12.181	16.4332	2.31746	1.59618	2.47064
SeIV_Til_8494	15.7511	12.8986	17.0893	3.00433	3.15605	2.77965
SeIV_Til_8554	14.577	11.7541	16.5226	1.47754	1.49323	1.50936
SeIV_Til_8614	16.1517	13.1202	17.8588	3.50167	1.51736	1.48484
SeIV_Til_8674	14.9101	12.1768	16.534	1.52115	1.46129	1.48377
SeIV_Til_8734	15.1626	12.6309	16.4041	1.51187	1.62104	1.49182
SeIV_Til_8794	15.6855	12.8462	16.8145	1.41769	1.40742	1.42072
SeIV_Til_8828	14.2236	11.4673	15.9185	1.50975	2.04969	1.43804
SeIV_Til_8889	15.1085	12.4747	16.661	1.5686	1.59663	1.6152
SeIV_Til_892	15.3901	12.8113	16.1228	1.56552	1.66676	2.99198
SeIV_Til_8949	15.1985	12.4552	16.7984	3.59221	2.9514	2.89305
SeIV_Til_9009	15.0736	12.5791	16.3229	2.45194	1.53042	3.36978
SeIV_Til_9069	16.1479	13.5148	16.7177	2.55772	1.39036	2.02151
SeIV_Til_9129	14.0596	11.5628	14.7156	1.42731	1.48169	1.50496
SeIV_Til_9189	10.1793	7.24695	11.0481	1.93591	2.40862	1.4904
SeIV_Til_9249	16.6326	13.9758	17.0304	3.96465	3.59046	3.55193
SeIV_Til_9309	16.8145	14.3051	17.5001	2.94132	1.64912	1.81452
SeIV_Til_9369	15.0361	12.7513	15.4727	1.73306	1.44394	1.34908
SeIV_Til_9429	17.4106	14.8678	17.9976	3.60978	4.28912	2.96286
SeIV_Til_9489	16.8182	14.9733	16.9797	3.32713	1.54234	1.47183
SeIV_Til_9549	16.1765	14.3548	16.4842	1.86067	2.05935	2.69069
SeIV_Til_958	16.1228	13.6972	16.6577	2.70562	1.38143	1.40464
SeIV_Til_9609	16.8237	15.2539	16.9035	4.44029	3.58642	1.62693
SeIV_Til_9669	16.8712	15.9311	16.834	4.70983	2.79476	2.11126
SeIV_Til_9729	16.1288	15.2296	16.0424	4.34073	1.43787	1.46955
SeIV_Til_9789	14.2188	13.0272	14.2506	1.53752	1.36326	2.45517
SeIV_Til_9849	16.1434	15.2697	16.142	4.21577	1.61419	2.51644
SeIV_Til_9909	17.2847	16.681	17.4438	5.49237	3.98942	4.67824
SeIV_Til_9969	16.8558	16.7422	16.8949	5.75798	4.5932	4.95624

## Sheet: SeMNPV_ORfs
# PI (persistent infection) VF (virus free)
ORF number	#NAMES_ORF number	Pl_a	Pl_b	Pl_c	PI_average	VF_a	VF_b	VF_c	VF_average	Ratio PI/VF
1	ORFs_SeMNPV_1	1.46966	1.40467	1.43653	1.43695	1.50005	1.35247	1.37008	1.40753	1.0209
2	ORFs_SeMNPV_2	1.519	1.50708	1.47702	1.50103	1.54037	1.45274	1.46041	1.4845	1.01114
3	ORFs_SeMNPV_3	1.45996	1.50147	1.43457	1.46533	1.42763	1.48628	1.50206	1.47199	0.995479
4	ORFs_SeMNPV_4	3.05586	2.94288	4.04359	3.34744	3.09349	2.76477	3.2083	3.02219	1.10762
5	ORFs_SeMNPV_5	2.19578	1.91629	1.74425	1.95211	3.40105	1.84395	1.8685	2.37116	0.823269
6	ORFs_SeMNPV_6	1.64367	1.7282	1.64122	1.67103	1.50722	1.80116	1.48133	1.59657	1.04664
7	ORFs_SeMNPV_7	1.4494	1.46212	1.40621	1.43924	1.43662	1.45235	2.11894	1.6693	0.862182
8	ORFs_SeMNPV_8	1.58679	1.51515	1.58978	1.56391	1.58998	2.29133	1.52577	1.80236	0.8677
9	ORFs_SeMNPV_9	1.57641	1.63426	1.58241	1.5977	1.46655	1.71117	1.52182	1.56651	1.01991
10	ORFs_SeMNPV_10	1.85289	3.56382	3.44345	2.95339	2.18728	3.07539	1.59858	2.28709	1.29133
11	ORFs_SeMNPV_11	6.50437	6.11995	5.69125	6.10519	6.58299	6.7839	5.68849	6.35179	0.961176
12	ORFs_SeMNPV_12	1.5089	1.56922	1.49105	1.52306	1.44951	1.54109	1.50034	1.49698	1.01742
13	ORFs_SeMNPV_13	2.88438	2.20795	1.33551	2.14261	1.39598	1.40917	3.02365	1.94293	1.10277
14	ORFs_SeMNPV_14	1.37798	2.1283	1.28989	1.59872	1.37949	1.39476	1.42855	1.40093	1.14118
15	ORFs_SeMNPV_15	1.52844	1.51297	1.48261	1.50801	2.3272	1.52027	1.53999	1.79582	0.839732
16	ORFs_SeMNPV_16	1.54869	1.51552	1.50204	1.52209	1.51253	1.53321	1.55582	1.53385	0.99233
17	ORFs_SeMNPV_17	1.73694	1.62733	1.89008	1.75145	1.74622	2.29332	1.41317	1.81757	0.963621
18	ORFs_SeMNPV_18	2.63693	1.46122	1.44408	1.84741	1.4326	1.49133	1.62984	1.51792	1.21707
19	ORFs_SeMNPV_19	1.79222	1.77336	1.659	1.74152	1.64091	1.73385	2.6853	2.02002	0.862132
20	ORFs_SeMNPV_20	3.01388	3.68154	2.67875	3.12472	2.48276	1.42825	3.52114	2.47738	1.2613
21	ORFs_SeMNPV_21	1.39124	1.84489	1.34372	1.52662	1.38186	1.41523	1.42514	1.40741	1.0847
22	ORFs_SeMNPV_22	1.5362	1.55704	1.49967	1.53097	1.54047	3.27481	1.54102	2.11877	0.722573
23	ORFs_SeMNPV_23	1.4413	1.45551	1.43798	1.44493	3.3701	1.31288	3.07984	2.5876	0.558405
24	ORFs_SeMNPV_24	1.52971	1.56439	1.50533	1.53314	2.46745	1.55092	1.64367	1.88735	0.812327
25	ORFs_SeMNPV_25	1.44562	1.48242	1.43469	1.45424	1.45252	1.48789	1.59261	1.51101	0.962431
26	ORFs_SeMNPV_26	1.5397	1.5185	1.53663	1.53161	1.55475	2.5756	1.50601	1.87879	0.815212
27	ORFs_SeMNPV_27	1.40395	1.43898	1.4007	1.41454	1.41239	1.43572	1.51196	1.45336	0.973292
28	ORFs_SeMNPV_28	1.54162	1.56036	1.53406	1.54535	1.53591	1.53991	1.50491	1.52691	1.01208
29	ORFs_SeMNPV_29	1.47802	1.49171	1.88023	1.61665	2.52034	2.86263	1.45906	2.28068	0.708848
30	ORFs_SeMNPV_30	1.44038	3.10879	2.14135	2.23017	3.25028	3.40647	2.85705	3.17127	0.703243
31	ORFs_SeMNPV_31	1.46809	1.50464	1.44913	1.47395	1.80532	1.49747	1.51736	1.60671	0.917372
32	ORFs_SeMNPV_32	3.45995	2.35308	1.71541	2.50948	3.72555	3.52026	3.5326	3.5928	0.698474
33	ORFs_SeMNPV_33	1.35977	1.40479	1.47039	1.41165	1.35419	1.49905	1.39361	1.41562	0.997201
34	ORFs_SeMNPV_34	1.66704	1.74486	1.66356	1.69182	1.53058	1.81119	1.47708	1.60628	1.05325
35	ORFs_SeMNPV_35	1.80407	1.34131	1.96093	1.70211	1.70892	2.19025	1.41218	1.77045	0.961398
36	ORFs_SeMNPV_36	2.52904	1.48477	2.91768	2.3105	2.49088	3.91067	2.96519	3.12225	0.740012
37	ORFs_SeMNPV_37	1.46629	1.48033	1.42362	1.45675	1.45544	1.47432	1.54589	1.49188	0.97645
38	ORFs_SeMNPV_38	1.79299	1.72763	1.64936	1.72333	1.88819	1.69653	1.85229	1.81233	0.950888
39	ORFs_SeMNPV_39	1.83186	1.79809	1.87815	1.83603	1.56808	1.95419	1.45099	1.65775	1.10754
40	ORFs_SeMNPV_40	1.3977	1.42878	1.33393	1.3868	1.39236	1.41084	1.44091	1.4147	0.980279
41	ORFs_SeMNPV_41	1.69855	1.8671	1.72842	1.76469	1.68983	1.98047	1.70365	1.79132	0.985135
42	ORFs_SeMNPV_42	1.52172	1.59179	1.50782	1.54044	2.38533	1.56141	1.50197	1.81624	0.848151
43	ORFs_SeMNPV_43	1.63238	1.71465	2.7865	2.04451	1.57984	1.75227	1.69787	1.67666	1.21939
44	ORFs_SeMNPV_44	1.28337	1.27916	1.5578	1.37344	1.96781	1.47727	1.78014	1.74174	0.788546
45	ORFs_SeMNPV_45	2.0547	1.90699	2.35931	2.107	1.63451	1.74557	1.84183	1.74064	1.21048
46	ORFs_SeMNPV_46	1.51584	1.50029	1.46849	1.49488	1.48743	1.51005	2.37221	1.78989	0.835176
47	ORFs_SeMNPV_47	2.84367	1.42573	1.95022	2.07321	1.40872	1.44297	2.09441	1.6487	1.25748
48	ORFs_SeMNPV_48	1.61274	1.6386	1.60548	1.61894	1.55906	1.62843	2.1807	1.78939	0.904742
49	ORFs_SeMNPV_49	1.5944	1.59505	1.58903	1.59283	1.56849	1.57698	1.53315	1.55954	1.02134
50	ORFs_SeMNPV_50	1.46758	1.38795	1.46181	1.43911	3.59396	3.09084	1.38309	2.68929	0.535127
51	ORFs_SeMNPV_51	2.00323	3.01419	1.68517	2.2342	1.67321	1.64241	4.41046	2.57536	0.86753
52	ORFs_SeMNPV_52	1.44363	1.4042	1.4103	1.41937	1.47793	1.36793	1.3926	1.41282	1.00464
53	ORFs_SeMNPV_53	1.57702	1.52882	1.57527	1.56037	1.57863	1.53379	1.52699	1.54647	1.00899
54	ORFs_SeMNPV_54	1.46109	2.98236	1.61707	2.02017	1.44122	1.48045	1.80258	1.57475	1.28285
55	ORFs_SeMNPV_55	1.46793	1.38332	1.44869	1.43331	1.48245	1.29276	1.3086	1.36127	1.05293
56	ORFs_SeMNPV_56	1.47611	1.51842	1.52553	1.50669	1.45014	1.60418	1.56445	1.53959	0.978627
57	ORFs_SeMNPV_57	1.62461	1.64022	1.56209	1.60898	1.58634	1.63124	1.68067	1.63275	0.985437
58	ORFs_SeMNPV_58	2.27697	1.92411	1.7519	1.98433	1.59604	1.93328	1.756	1.76177	1.12633
59	ORFs_SeMNPV_59	1.37482	1.43136	1.30249	1.36955	1.37912	1.40197	1.4593	1.41347	0.968933
60	ORFs_SeMNPV_60	1.4788	1.4794	1.43153	1.46324	1.4618	1.47587	1.48318	1.47362	0.992962
61	ORFs_SeMNPV_61	1.54092	1.57575	1.50535	1.54067	1.53255	1.50553	1.58134	1.5398	1.00056
62	ORFs_SeMNPV_62	1.50719	1.56815	1.48754	1.52096	1.45357	1.53301	1.47101	1.48586	1.02362
63	ORFs_SeMNPV_63	1.4525	1.48826	1.43535	1.4587	1.42815	1.48119	1.51535	1.4749	0.989019
64	ORFs_SeMNPV_64	1.32701	1.36655	1.46466	1.38607	1.32763	1.45204	1.35371	1.37779	1.00601
65	ORFs_SeMNPV_65	1.57182	1.5751	1.51958	1.5555	1.52118	1.56352	1.5853	1.55666	0.999253
66	ORFs_SeMNPV_66	1.42792	1.46328	1.39628	1.42916	1.43424	1.44519	1.54935	1.47626	0.968099
67	ORFs_SeMNPV_67	1.41789	1.46041	2.56361	1.81397	1.41012	1.42257	2.68015	1.83761	0.987132
68	ORFs_SeMNPV_68	1.60618	2.32869	1.64648	1.86045	1.45823	1.87995	1.49365	1.61061	1.15512
69	ORFs_SeMNPV_69	1.4585	1.43836	1.56132	1.48606	1.48237	1.41063	1.42212	1.43837	1.03315
70	ORFs_SeMNPV_70	3.00263	1.45129	3.17491	2.54294	1.37768	1.45705	1.43553	1.42342	1.7865
71	ORFs_SeMNPV_71	1.72429	2.42855	2.01994	2.05759	1.6851	1.52509	1.62584	1.61201	1.27641
72	ORFs_SeMNPV_72	1.4738	1.36925	1.48152	1.44152	1.51615	1.36497	1.39189	1.42434	1.01207
73	ORFs_SeMNPV_73	1.49323	1.49147	2.79782	1.92751	2.57105	2.27697	2.11044	2.31949	0.831006
74	ORFs_SeMNPV_74	1.4123	2.57237	1.36637	1.78368	1.40575	1.41979	2.4224	1.74932	1.01964
75	ORFs_SeMNPV_75	1.50431	1.4727	1.47965	1.48555	1.51337	1.37026	1.3784	1.42068	1.04566
76	ORFs_SeMNPV_76	2.94132	1.51884	1.48867	1.98294	1.54084	1.45245	1.57397	1.52242	1.30249
77	ORFs_SeMNPV_77	1.51216	1.43072	1.51641	1.48643	1.5551	1.46107	1.42591	1.48069	1.00387
78	ORFs_SeMNPV_78	1.6562	3.49426	2.95893	2.70313	2.93603	3.28056	4.26658	3.49439	0.773563
79	ORFs_SeMNPV_79	1.47254	1.46583	1.42472	1.45437	1.48971	1.4326	1.45073	1.45768	0.997727
80	ORFs_SeMNPV_80	3.71743	1.38282	2.20477	2.43501	2.88018	1.33982	1.36463	1.86154	1.30806
81	ORFs_SeMNPV_81	2.90358	1.61567	1.63716	2.05214	1.42789	2.69669	2.77123	2.29861	0.892775
82	ORFs_SeMNPV_82	1.56185	2.06141	1.61877	1.74734	1.49928	1.81556	1.98547	1.76677	0.989005
83	ORFs_SeMNPV_83	1.38017	2.23281	1.44379	1.68559	1.6234	2.76373	1.41835	1.93516	0.871034
84	ORFs_SeMNPV_84	1.43886	1.46564	1.44521	1.4499	1.54592	1.47843	2.60861	1.87765	0.772188
85	ORFs_SeMNPV_85	1.55668	1.64436	1.60408	1.60171	1.50521	1.77916	1.63619	1.64019	0.976539
86	ORFs_SeMNPV_86	1.54802	1.63254	1.6534	1.61132	1.49867	1.76317	1.62987	1.63057	0.988194
87	ORFs_SeMNPV_87	1.68963	1.57231	1.58268	1.61487	1.5869	2.21114	1.63705	1.8117	0.891358
88	ORFs_SeMNPV_88	1.50831	1.6766	1.48069	1.5552	1.46394	2.09811	1.46438	1.67547	0.928215
89	ORFs_SeMNPV_89	1.46784	1.3802	1.46558	1.43788	1.51066	2.39178	1.37382	1.75875	0.817554
90	ORFs_SeMNPV_90	1.52609	1.59311	1.51283	1.54401	1.47268	1.5916	1.47426	1.51285	1.0206
91	ORFs_SeMNPV_91	1.47141	1.48722	1.43061	1.46308	1.46333	1.48152	2.34818	1.76434	0.829251
92	ORFs_SeMNPV_92	1.57933	1.59105	2.2672	1.81252	1.56185	1.57333	1.67055	1.60191	1.13147
93	ORFs_SeMNPV_93	2.33436	1.51094	1.55092	1.79874	1.54984	1.58959	1.5686	1.56934	1.14617
94	ORFs_SeMNPV_94	1.59225	1.47456	1.47646	1.51442	1.50898	2.08499	1.45607	1.68335	0.899649
95	ORFs_SeMNPV_95	1.50062	1.55211	1.48513	1.51262	1.44622	1.53277	1.51598	1.49833	1.00954
96	ORFs_SeMNPV_96	1.61849	1.5927	1.54767	1.58629	1.57317	1.59212	1.64503	1.60344	0.989299
97	ORFs_SeMNPV_97	2.98509	2.4289	2.88856	2.76752	1.37121	1.39408	1.63585	1.46705	1.88645
98	ORFs_SeMNPV_98	4.00056	2.68118	3.03218	3.23797	3.68965	4.40234	4.19244	4.09481	0.79075
99	ORFs_SeMNPV_99	1.60106	1.58462	1.53825	1.57464	1.56672	1.57765	1.64041	1.59493	0.987282
100	ORFs_SeMNPV_100	1.49814	1.45209	1.47357	1.4746	1.50972	1.35649	1.36578	1.41066	1.04532
101	ORFs_SeMNPV_101	1.53693	1.51071	1.49186	1.51316	1.50312	1.52703	1.54109	1.52375	0.993055
102	ORFs_SeMNPV_102	1.45687	1.49573	1.43538	1.46266	1.42844	1.48381	1.51184	1.4747	0.991841
103	ORFs_SeMNPV_103	1.70587	1.76416	1.64013	1.70339	1.61573	1.75209	1.73288	1.70023	1.00185
104	ORFs_SeMNPV_104	1.52453	1.50512	1.47944	1.50303	1.49675	1.51659	2.10685	1.70673	0.880648
105	ORFs_SeMNPV_105	5.40994	5.90459	6.81338	6.04263	6.4983	6.78567	6.59968	6.62788	0.911699
106	ORFs_SeMNPV_106	2.96111	1.43163	1.37663	1.92312	1.87841	5.27904	3.20465	3.45403	0.556775
107	ORFs_SeMNPV_107	1.53009	1.54698	1.49723	1.52477	1.53656	1.4712	1.50349	1.50375	1.01397
108	ORFs_SeMNPV_108	1.83452	1.51209	1.91069	1.75243	1.69384	1.54034	1.57389	1.60269	1.09343
109	ORFs_SeMNPV_109	2.4354	1.49554	4.52509	2.81867	1.47975	1.5018	1.5535	1.51168	1.86459
110	ORFs_SeMNPV_110	3.43386	1.98966	4.99873	3.47408	2.36793	1.62481	2.30539	2.09938	1.65482
111	ORFs_SeMNPV_111	1.58115	1.43821	1.59929	1.53955	1.60251	1.48382	1.44608	1.51081	1.01903
112	ORFs_SeMNPV_112	1.76601	2.28844	1.88162	1.97869	1.69427	1.47829	1.50794	1.56017	1.26826
113	ORFs_SeMNPV_113	1.36184	1.40554	1.44717	1.40485	1.36801	1.47468	1.41109	1.41792	0.990779
114	ORFs_SeMNPV_114	1.65988	1.67833	1.59119	1.64313	1.60182	1.66717	1.69972	1.65624	0.992088
115	ORFs_SeMNPV_115	1.58896	1.532	1.52986	1.55027	1.52121	1.57836	1.57394	1.55783	0.995147
116	ORFs_SeMNPV_116	1.50151	1.4936	1.45337	1.48283	1.47707	1.50765	1.51164	1.49879	0.989352
117	ORFs_SeMNPV_117	3.9842	2.00298	3.79032	3.25917	3.57133	4.32139	4.8712	4.25464	0.766027
118	ORFs_SeMNPV_118	1.35988	1.37324	1.52632	1.41981	1.34914	1.49182	2.47522	1.77206	0.801221
119	ORFs_SeMNPV_119	1.77262	2.45969	1.78196	2.00476	2.47249	2.10637	2.95119	2.51002	0.798703
120	ORFs_SeMNPV_120	1.43525	1.47902	5.71473	2.87633	1.67746	3.07765	2.68574	2.48028	1.15968
121	ORFs_SeMNPV_121	1.48991	1.50083	1.44876	1.47983	1.7842	1.49726	1.59094	1.62413	0.911151
122	ORFs_SeMNPV_122	2.01088	1.32642	2.65318	1.99682	1.46593	1.42445	1.43205	1.44081	1.3859
123	ORFs_SeMNPV_123	1.48394	1.48119	1.43612	1.46708	1.49352	1.4554	1.47774	1.47555	0.994263
124	ORFs_SeMNPV_124	1.39799	1.44278	1.36224	1.401	1.40851	1.42123	1.91376	1.58117	0.886055
125	ORFs_SeMNPV_125	1.57189	1.427	1.5878	1.5289	3.94792	1.47643	1.43486	2.2864	0.668692
126	ORFs_SeMNPV_126	1.51331	1.50052	1.46658	1.49347	1.48949	1.5083	1.5471	1.51496	0.985814
127	ORFs_SeMNPV_127	4.07918	3.89705	3.67158	3.8826	3.57736	3.38439	1.6377	2.86648	1.35448
128	ORFs_SeMNPV_128	2.29064	1.40288	1.41643	1.70332	1.47468	1.38276	1.39977	1.41907	1.20031
129	ORFs_SeMNPV_129	4.00281	2.96229	3.66636	3.54382	3.56289	4.16845	3.76199	3.83111	0.925012
130	ORFs_SeMNPV_130	1.47005	1.38286	1.46744	1.44012	1.51324	2.33976	1.3782	1.74373	0.825882
131	ORFs_SeMNPV_131	2.37325	1.49549	1.42447	1.76441	1.4312	1.47437	1.44459	1.45005	1.21679
132	ORFs_SeMNPV_132	2.01355	1.35269	2.11451	1.82692	3.30279	1.32484	1.4791	2.03558	0.897493
133	ORFs_SeMNPV_133	2.53308	1.41571	2.39178	2.11352	1.44346	2.27519	1.41579	1.71148	1.23491
134	ORFs_SeMNPV_134	1.36762	1.41322	4.85863	2.54649	1.3294	1.57341	1.36435	1.42238	1.79029
135	ORFs_SeMNPV_135	3.41196	3.35611	4.01894	3.59567	3.23618	2.89534	4.80703	3.64619	0.986146
136	ORFs_SeMNPV_136	3.83293	3.93517	2.96519	3.57776	3.48457	3.29023	2.69216	3.15565	1.13376
137	ORFs_SeMNPV_137	2.55179	1.46308	1.44199	1.81896	1.43422	1.49033	1.54694	1.4905	1.22037
138	ORFs_SeMNPV_138	2.6843	1.85702	1.69309	2.07813	2.55078	1.85342	1.76859	2.0576	1.00998
139	ORFs_SeMNPV_139	1.60508	1.51539	1.54037	1.55361	1.5151	2.81721	1.56624	1.96618	0.790166
140	ORFs_SeMNPV_140	1.39157	1.42163	2.25715	1.69012	2.26171	1.39927	2.30652	1.98917	0.849661
141	ORFs_SeMNPV_141	2.54155	1.76352	1.92475	2.07661	1.58929	1.91229	1.46085	1.65414	1.2554
142	ORFs_SeMNPV_142	1.58268	1.62191	1.63612	1.61357	2.62604	3.64195	1.49154	2.58651	0.62384
143	ORFs_SeMNPV_143	2.52647	2.48933	1.48208	2.16596	1.53854	2.46168	1.61651	1.87224	1.15688
144	ORFs_SeMNPV_144	1.61551	1.53298	1.54319	1.56389	1.55001	1.57816	1.58695	1.5717	0.995031
145	ORFs_SeMNPV_145	1.45142	1.4619	1.40793	1.44042	1.43713	1.45359	2.35658	1.7491	0.82352
146	ORFs_SeMNPV_146	1.45204	1.38633	1.424	1.42079	1.48567	1.33521	1.3605	1.39379	1.01937
147	ORFs_SeMNPV_147	1.43482	1.48372	1.40649	1.44168	1.41081	1.45918	1.47505	1.44835	0.995395
148	ORFs_SeMNPV_148	1.49175	1.55025	1.56701	1.53634	1.43371	1.69712	1.52525	1.55203	0.98989
149	ORFs_SeMNPV_149	1.44286	1.41074	1.40644	1.42001	1.4738	1.88819	1.40243	1.58814	0.894137
150	ORFs_SeMNPV_150	1.50975	1.50003	1.46359	1.49112	1.48774	1.50603	1.54937	1.51438	0.984641
151	ORFs_SeMNPV_151	2.06141	2.24363	2.0459	2.11698	1.66437	1.70072	1.51518	1.62676	1.30135
152	ORFs_SeMNPV_152	2.64015	1.42718	1.64849	1.90528	2.86744	3.84776	3.51849	3.41123	0.55853
153	ORFs_SeMNPV_153	1.46677	1.43562	1.65162	1.518	1.3182	1.84054	2.14372	1.76748	0.858849
154	ORFs_SeMNPV_154	1.5082	1.49696	1.46043	1.48853	1.48214	1.53311	1.59273	1.53599	0.969098
155	ORFs_SeMNPV_155	1.53783	1.57907	1.55713	1.55801	1.45418	1.64524	1.52449	1.5413	1.01084
156	ORFs_SeMNPV_156	1.3709	1.43122	1.28503	1.36238	1.37078	2.57402	1.44786	1.79755	0.757908
157	ORFs_SeMNPV_157	1.45431	1.38923	1.62892	1.49082	2.50545	1.70749	2.24026	2.15106	0.693061
158	ORFs_SeMNPV_158	1.64487	1.6839	1.71765	1.68214	1.4493	2.0543	1.45001	1.6512	1.01874
159	ORFs_SeMNPV_159	1.64057	1.62352	1.64528	1.63646	1.58703	1.61975	1.54332	1.58337	1.03353
160	ORFs_SeMNPV_160	3.34402	3.63971	1.55082	2.84485	2.03234	1.39951	2.8719	2.10125	1.35388
161	ORFs_SeMNPV_161	1.47663	1.48208	1.51925	1.49266	1.43132	1.5372	1.47222	1.48025	1.00838
162	ORFs_SeMNPV_162	1.38238	1.41715	1.31031	1.36995	1.39694	1.38703	1.41832	1.40076	0.978
163	ORFs_SeMNPV_163	3.90593	2.22643	2.81	2.98079	2.16883	2.61253	3.42928	2.73688	1.08912
164	ORFs_SeMNPV_164	1.50531	1.49492	1.45732	1.48585	2.29901	2.44444	1.47338	2.07228	0.717012
165	ORFs_SeMNPV_165	1.46897	1.32627	1.49354	1.4296	1.45083	2.02264	1.59573	1.68974	0.846047
166	ORFs_SeMNPV_166	1.97023	1.62886	1.98619	1.86176	1.67723	1.66094	1.5525	1.63022	1.14203
167	ORFs_SeMNPV_167	1.47999	2.33576	1.44864	1.75479	1.82249	1.50127	1.88438	1.73604	1.0108
168	ORFs_SeMNPV_168	1.45593	1.49122	1.42921	1.45879	1.43972	1.47314	2.06624	1.6597	0.878947
169	ORFs_SeMNPV_169	1.3816	1.43346	1.32219	1.37908	1.38786	1.40838	1.47313	1.42312	0.969053
170	ORFs_SeMNPV_170	1.55906	1.45005	1.5666	1.52524	1.5864	1.48494	1.4494	1.50691	1.01216
171	ORFs_SeMNPV_171	1.40442	1.44449	1.39476	1.41455	1.41942	1.43716	1.53486	1.46381	0.966349
172	ORFs_SeMNPV_172	1.34163	1.38344	1.45772	1.39426	1.3417	1.4671	1.37738	1.39539	0.999191
173	ORFs_SeMNPV_173	1.52989	1.53349	1.63142	1.56493	1.53399	1.50059	1.55142	1.52867	1.02372
174	ORFs_SeMNPV_174	1.36377	1.42594	1.22331	1.33767	1.36335	1.38823	2.64269	1.79809	0.743941
175	ORFs_SeMNPV_175	1.40456	1.4397	1.35428	1.39951	1.4052	2.25536	1.48294	1.7145	0.816282
176	ORFs_SeMNPV_176	1.5182	1.54623	1.49026	1.51823	1.524	1.53453	1.63378	1.5641	0.970672
177	ORFs_SeMNPV_177	1.47754	1.47732	1.43131	1.46206	1.4565	1.47807	1.48567	1.47341	0.992295
178	ORFs_SeMNPV_178	1.37555	1.4185	2.70512	1.83305	1.38801	1.3862	1.41608	1.39676	1.31236
179	ORFs_SeMNPV_179	1.7239	2.81039	2.65584	2.39671	1.72326	1.64112	3.30316	2.22251	1.07838
180	ORFs_SeMNPV_180	1.64738	1.73036	1.64367	1.6738	1.51469	1.78873	1.48033	1.59458	1.04968
181	ORFs_SeMNPV_181	3.65785	1.72711	2.61708	2.66735	1.45299	2.98335	1.53603	1.99079	1.33984
182	ORFs_SeMNPV_182	4.35867	3.60896	4.01288	3.99351	2.00249	4.7716	2.35351	3.04253	1.31256
183	ORFs_SeMNPV_183	1.75468	1.43545	1.41875	1.5363	1.41818	3.60027	1.51564	2.17803	0.70536
184	ORFs_SeMNPV_184	1.51306	1.47047	1.51285	1.49879	1.54957	1.48296	1.4586	1.49705	1.00117
185	ORFs_SeMNPV_185	1.63352	1.69559	1.62746	1.65219	1.54139	1.70115	1.49484	1.57913	1.04627
186	ORFs_SeMNPV_186	1.89028	1.62766	1.65131	1.72308	1.64648	1.62205	1.99932	1.75595	0.98128
187	ORFs_SeMNPV_187	2.49594	1.70519	1.81787	2.00633	1.86184	2.11339	3.56684	2.51402	0.798058
188	ORFs_SeMNPV_188	1.44961	1.46303	1.47345	1.46203	1.4261	1.49623	1.47651	1.46628	0.997101
189	ORFs_SeMNPV_189	1.35327	1.39872	1.49525	1.41574	1.33337	2.47484	1.36898	1.72573	0.820373
190	ORFs_SeMNPV_190	1.50259	1.49791	1.87428	1.62493	1.48753	1.49341	1.51845	1.4998	1.08343
191	ORFs_SeMNPV_191	1.49643	1.49403	1.44684	1.4791	1.50029	1.47328	1.50579	1.49312	0.990611
192	ORFs_SeMNPV_192	1.75339	1.77262	1.78281	1.76961	1.56838	2.46249	1.47975	1.83687	0.963379
193	ORFs_SeMNPV_193	1.42812	1.43708	3.28302	2.0494	1.41594	1.47831	1.45878	1.45101	1.4124
194	ORFs_SeMNPV_194	1.92705	1.85718	1.71385	1.83269	2.45719	1.77058	1.79368	2.00715	0.913084
195	ORFs_SeMNPV_195	1.39268	1.42528	1.3252	1.38105	1.3905	1.40601	3.44853	2.08168	0.663432
196	ORFs_SeMNPV_196	1.57666	1.66337	1.60046	1.6135	1.54115	2.38587	2.05878	1.99527	0.808663
197	ORFs_SeMNPV_197	1.4464	1.37958	3.29046	2.03881	1.48101	2.57333	1.35523	1.80319	1.13067
198	ORFs_SeMNPV_198	1.47875	1.49108	1.43776	1.4692	1.46952	1.48695	1.57281	1.50976	0.973135
199	ORFs_SeMNPV_199	1.72381	1.59076	1.60096	1.63851	2.64544	1.61628	1.6545	1.97207	0.830857
200	ORFs_SeMNPV_200	1.59991	1.62962	1.68087	1.6368	1.43248	1.9921	1.45753	1.62737	1.0058
201	ORFs_SeMNPV_201	1.57733	1.54752	1.52367	1.54951	1.51785	1.57295	1.58888	1.55989	0.993345
202	ORFs_SeMNPV_202	1.408	1.4338	1.41601	1.41927	1.41255	1.44432	1.49192	1.4496	0.979078
203	ORFs_SeMNPV_203	1.47813	1.46011	1.37934	1.4392	1.39912	1.52548	2.75755	1.89405	0.759851
204	ORFs_SeMNPV_204	1.43413	1.46055	1.39512	1.42993	1.43286	1.44315	1.51956	1.46519	0.975938
205	ORFs_SeMNPV_205	1.47962	1.39531	1.47924	1.45139	1.55311	1.41255	1.39104	1.45223	0.999421
206	ORFs_SeMNPV_206	1.37785	2.77676	1.29276	1.81579	1.90836	1.38766	1.5125	1.60284	1.13286
207	ORFs_SeMNPV_207	1.4658	1.38723	1.42677	1.4266	1.48736	2.63944	1.35913	1.82864	0.780142
208	ORFs_SeMNPV_208	2.08174	1.83739	1.68954	1.86956	1.65059	2.97666	1.77262	2.13329	0.876372
209	ORFs_SeMNPV_209	1.76965	3.11615	2.43928	2.44169	1.69787	2.58518	2.88955	2.39087	1.02126
210	ORFs_SeMNPV_210	3.90223	3.80075	3.88101	3.86133	3.79612	4.67506	3.82494	4.09871	0.942085
211	ORFs_SeMNPV_211	1.8373	1.83492	1.6836	1.78527	1.64611	1.76979	1.76736	1.72775	1.03329
212	ORFs_SeMNPV_212	1.40974	2.30652	1.39954	1.70527	1.41243	1.43606	1.51143	1.45331	1.17337
213	ORFs_SeMNPV_213	1.42503	1.80144	1.38352	1.53667	1.44904	1.39296	1.41576	1.41925	1.08273
214	ORFs_SeMNPV_214	1.53158	1.59135	1.52575	1.54956	1.8083	1.59853	1.65228	1.68637	0.918873
215	ORFs_SeMNPV_215	1.97292	1.94009	1.78333	1.89878	1.6225	1.81664	1.81483	1.75132	1.0842
216	ORFs_SeMNPV_216	1.37763	1.42797	1.29768	1.36776	1.38061	1.40108	1.45181	1.41117	0.969241
217	ORFs_SeMNPV_217	1.38186	1.88174	1.30655	1.52338	2.78938	2.70337	1.57289	2.35521	0.646814
218	ORFs_SeMNPV_218	1.42802	1.45927	1.39062	1.42597	1.43043	1.43998	1.53228	1.46756	0.971658
219	ORFs_SeMNPV_219	1.54771	1.42291	1.55869	1.50977	1.58158	1.46895	1.42513	1.49189	1.01199
220	ORFs_SeMNPV_220	2.38751	2.70288	3.14828	2.74622	1.39792	2.50765	1.43409	1.77989	1.54292
221	ORFs_SeMNPV_221	1.28294	1.28156	1.56775	1.37742	2.64015	1.49629	2.19164	2.10936	0.653003
222	ORFs_SeMNPV_222	1.53719	1.58812	1.50594	1.54375	1.50596	1.52236	1.79351	1.60727	0.960477
223	ORFs_SeMNPV_223	1.74503	1.68604	1.62655	1.68587	1.62854	2.21828	1.71445	1.85376	0.909432
224	ORFs_SeMNPV_224	1.40876	1.42868	1.34908	1.39551	1.4063	2.58796	1.43223	1.80883	0.771497
225	ORFs_SeMNPV_225	1.48601	1.47526	1.57063	1.51063	1.40111	1.6191	1.43151	1.48391	1.01801
226	ORFs_SeMNPV_226	1.47159	1.50943	1.45121	1.47741	1.43517	1.50129	1.51546	1.48398	0.995575
227	ORFs_SeMNPV_227	1.57754	1.60755	1.56614	1.58374	1.55059	1.58329	1.51684	1.55024	1.02161
228	ORFs_SeMNPV_228	1.55881	1.63319	1.5408	1.5776	2.73779	1.62352	1.49651	1.95261	0.807946
229	ORFs_SeMNPV_229	5.15011	4.37512	5.06866	4.86463	4.55872	5.76433	4.73814	5.02039	0.968974
230	ORFs_SeMNPV_230	2.18247	1.73525	1.69235	1.87003	1.67288	1.67273	1.77688	1.7075	1.09518
231	ORFs_SeMNPV_231	1.67804	2.35805	1.74018	1.92542	1.66418	1.49617	1.4962	1.55218	1.24046
232	ORFs_SeMNPV_232	1.80689	2.01735	2.46674	2.09699	1.69601	1.51283	1.55208	1.58697	1.32138
233	ORFs_SeMNPV_233	1.5982	1.52618	1.53531	1.55323	1.52857	1.57984	1.56792	1.55878	0.996442
234	ORFs_SeMNPV_234	1.61681	1.5974	1.61899	1.61107	1.58312	1.58699	1.54162	1.57058	1.02578
235	ORFs_SeMNPV_235	1.68571	1.69166	1.69136	1.68958	1.57848	1.70403	1.52544	1.60265	1.05424
236	ORFs_SeMNPV_236	1.53739	1.60373	1.52424	1.55512	1.48595	1.5664	1.47901	1.51045	1.02957
237	ORFs_SeMNPV_237	1.62369	1.70202	1.6146	1.64677	1.50843	2.15675	1.48637	1.71718	0.958997
238	ORFs_SeMNPV_238	1.47711	1.51711	1.45612	1.48345	1.43698	1.50708	1.51433	1.48613	0.998194
239	ORFs_SeMNPV_239	3.76037	2.21169	3.134	3.03535	3.98755	4.2616	4.32566	4.1916	0.72415
240	ORFs_SeMNPV_240	1.47245	1.38887	1.45407	1.43846	1.4837	2.68015	1.87018	2.01135	0.715174
241	ORFs_SeMNPV_241	1.60903	1.63003	1.7148	1.65129	2.245	2.06368	1.43643	1.91504	0.862273
242	ORFs_SeMNPV_242	1.35826	1.38876	1.45871	1.40191	1.35734	1.4546	1.39144	1.40113	1.00056
243	ORFs_SeMNPV_243	2.1443	1.52941	2.13453	1.93608	1.70789	1.55913	1.54499	1.604	1.20703
244	ORFs_SeMNPV_244	1.5927	1.60588	1.53857	1.57905	1.56922	1.59373	1.66001	1.60765	0.982207
245	ORFs_SeMNPV_245	1.34449	1.35642	3.08221	1.92771	1.32099	1.49035	1.33941	1.38359	1.39327
246	ORFs_SeMNPV_246	1.42639	1.44656	1.38056	1.41784	1.41947	1.43092	1.46114	1.43718	0.986545
247	ORFs_SeMNPV_247	2.48933	1.42804	1.26552	1.72763	1.36986	2.81359	1.44461	1.87602	0.920902
248	ORFs_SeMNPV_248	1.51443	1.49803	2.96414	1.9922	1.33885	1.95206	1.40581	1.56557	1.27251
249	ORFs_SeMNPV_249	2.63526	2.13555	3.91515	2.89532	2.20664	2.73928	3.62938	2.85843	1.0129
250	ORFs_SeMNPV_250	1.50297	1.41111	1.50822	1.4741	1.55131	1.44056	1.40852	1.4668	1.00498
251	ORFs_SeMNPV_251	1.33167	1.35977	1.48507	1.39217	1.3288	1.44548	1.34788	1.37405	1.01318
252	ORFs_SeMNPV_252	1.53854	1.55407	1.4968	1.5298	1.54372	1.49896	2.22077	1.75448	0.87194
253	ORFs_SeMNPV_253	1.46192	1.46412	1.41442	1.44682	1.46661	1.43838	1.45921	1.45473	0.99456
254	ORFs_SeMNPV_254	1.35726	1.36858	3.86166	2.19583	1.9455	1.49814	2.68916	2.04427	1.07414
255	ORFs_SeMNPV_255	1.79168	1.43222	1.35039	1.52476	1.40002	1.41577	1.4445	1.4201	1.0737
256	ORFs_SeMNPV_256	1.68798	1.62052	1.58711	1.63187	1.60096	1.62669	1.66884	1.63217	0.999818
257	ORFs_SeMNPV_257	1.56082	1.39184	2.59791	1.85019	1.73078	2.42572	1.51613	1.89088	0.978484
258	ORFs_SeMNPV_258	2.68118	1.57874	2.99371	2.41788	1.51668	3.61813	2.82536	2.65339	0.911241
259	ORFs_SeMNPV_259	3.21173	1.92338	2.28538	2.4735	2.60074	3.77719	2.41348	2.93047	0.844063
260	ORFs_SeMNPV_260	2.97059	1.84213	2.50992	2.44088	2.7916	4.08161	1.57089	2.8147	0.867191
261	ORFs_SeMNPV_261	1.47861	1.51329	1.4691	1.487	1.48379	1.52141	1.62116	1.54212	0.964256
262	ORFs_SeMNPV_262	1.51787	1.55108	1.49465	1.5212	1.5078	1.45643	1.48178	1.48201	1.02645
263	ORFs_SeMNPV_263	1.86101	1.94697	1.77828	1.86209	1.59713	1.91675	1.77058	1.76148	1.05711
264	ORFs_SeMNPV_264	1.52457	1.51975	1.48992	1.51141	1.53973	1.44909	1.45324	1.48069	1.02075
265	ORFs_SeMNPV_265	1.44435	1.36289	1.43695	1.41473	1.48059	1.32668	1.34163	1.38296	1.02297
266	ORFs_SeMNPV_266	1.46017	1.98047	1.42902	1.62322	1.42381	1.4856	1.46997	1.45979	1.11195
267	ORFs_SeMNPV_267	1.41389	1.44671	1.44878	1.43646	1.41888	1.49233	2.09007	1.66709	0.861655
268	ORFs_SeMNPV_268	1.42955	1.40636	1.3981	1.41134	1.46251	1.37682	1.40377	1.41437	0.997858
269	ORFs_SeMNPV_269	1.4215	2.34915	2.28795	2.01953	1.40366	2.65838	1.68137	1.91447	1.05488
270	ORFs_SeMNPV_270	1.41192	1.46318	1.37011	1.41507	1.38671	2.81593	1.43769	1.88011	0.752654
271	ORFs_SeMNPV_271	1.5897	1.53242	1.53042	1.55085	1.51918	1.58083	1.57586	1.55862	0.995011
272	ORFs_SeMNPV_272	1.493	1.52084	2.34591	1.78658	1.44484	1.53334	1.52679	1.50165	1.18974
273	ORFs_SeMNPV_273	1.50919	1.51722	1.46955	1.49865	1.50461	1.51379	1.61127	1.54322	0.971117
274	ORFs_SeMNPV_274	1.78269	1.63181	1.62813	1.68088	1.62773	1.63642	1.68876	1.65097	1.01812
275	ORFs_SeMNPV_275	1.65843	1.64328	1.57765	1.62645	1.59852	1.63561	1.68154	1.63856	0.992615
276	ORFs_SeMNPV_276	1.43873	1.46696	1.40172	1.4358	1.43809	1.45059	1.5366	1.47509	0.973364
277	ORFs_SeMNPV_277	2.80133	1.84957	1.68316	2.11135	2.1638	1.81861	1.75695	1.91312	1.10362
278	ORFs_SeMNPV_278	1.43946	1.39641	1.41933	1.4184	1.47962	1.37505	1.39124	1.41531	1.00218

## Sheet: SeMNPV_tiling
# PI (persistent infection) VF (virus free)
nucleotide position of the probe	#NAMES_nucleotide position	Pl_a	Pl_b	Pl_c	PI_average	VF_a	VF_b	VF_c	VF_average	Ratio PI/VF
1	SeMNPV_Til_1	1.4891	1.53434	2.53055	1.85133	1.45264	1.51028	1.45988	1.47427	1.25576
61	SeMNPV_Til_61	1.63716	1.66118	1.64328	1.64721	1.47686	1.88533	1.8551	1.7391	0.947161
121	SeMNPV_Til_121	1.42723	1.41218	1.50663	1.44868	1.42395	1.50161	1.40868	1.44475	1.00272
181	SeMNPV_Til_181	1.45528	1.46552	1.48704	1.46928	1.42667	1.50526	1.4713	1.46774	1.00105
241	SeMNPV_Til_241	2.828	1.46048	1.39986	1.89611	1.47426	3.53717	1.55593	2.18912	0.866154
301	SeMNPV_Til_301	1.41815	1.4138	1.37721	1.40305	1.44343	1.38538	3.42189	2.08356	0.673391
361	SeMNPV_Til_361	1.67672	1.70023	1.60722	1.66139	1.60856	1.68854	1.71241	1.66984	0.994943
421	SeMNPV_Til_421	4.65747	4.73721	4.83682	4.74383	4.1045	3.82789	4.42609	4.11949	1.15156
481	SeMNPV_Til_481	3.13677	2.91922	2.93078	2.99559	3.63607	3.65785	4.10243	3.79878	0.788566
541	SeMNPV_Til_541	1.36451	1.41958	2.56102	1.78171	1.36764	1.38294	2.24333	1.66464	1.07033
601	SeMNPV_Til_601	1.39272	1.41808	1.33381	1.38154	1.41095	1.39173	1.46415	1.42228	0.971355
661	SeMNPV_Til_661	1.46241	1.39925	1.42941	1.43036	1.49453	1.34884	1.36937	1.40424	1.0186
721	SeMNPV_Til_721	3.44011	3.25084	1.67254	2.78783	3.66491	1.96029	2.78034	2.80184	0.994998
781	SeMNPV_Til_781	1.4405	1.4072	1.41974	1.42248	1.47542	1.40243	1.40573	1.42786	0.996235
841	SeMNPV_Til_841	5.91231	5.08589	5.14382	5.38067	5.55039	6.14991	5.73482	5.81171	0.925833
901	SeMNPV_Til_901	2.06444	2.06496	2.11798	2.08246	1.75329	1.41177	1.53552	1.56686	1.32907
961	SeMNPV_Til_961	1.59775	1.40111	2.23598	1.74495	2.62575	1.45653	1.41098	1.83109	0.952959
1021	SeMNPV_Til_1021	6.76056	7.16058	6.87584	6.93233	6.72648	7.04005	7.12299	6.96317	0.99557
1081	SeMNPV_Til_1081	1.51007	1.49326	2.6011	1.86814	1.53406	1.4397	1.44475	1.47284	1.2684
1141	SeMNPV_Til_1141	5.91644	6.45811	7.81256	6.72904	7.28462	7.53408	7.08641	7.30171	0.921571
1201	SeMNPV_Til_1201	1.57163	1.58731	1.52532	1.56142	1.5593	1.56895	1.64841	1.59222	0.980655
1261	SeMNPV_Til_1261	1.57146	1.41947	1.28122	1.42405	1.37999	1.3851	3.01024	1.92511	0.739723
1321	SeMNPV_Til_1321	12.1434	11.1564	11.5023	11.6007	11.4848	12.5571	12.5904	12.2107	0.950041
1381	SeMNPV_Til_1381	1.7431	1.61344	1.61116	1.6559	1.61362	1.62693	1.67179	1.63745	1.01127
1441	SeMNPV_Til_1441	10.3529	9.6366	9.91564	9.96839	9.75235	10.6217	9.90124	10.0918	0.987774
1501	SeMNPV_Til_1501	1.5204	1.51782	1.4723	1.50351	1.52555	1.49201	1.53891	1.51882	0.989917
1561	SeMNPV_Til_1561	9.03549	8.3008	8.37484	8.57037	8.45658	9.11551	9.19491	8.92234	0.960553
1621	SeMNPV_Til_1621	1.46882	1.48178	1.42616	1.45892	1.45768	1.47631	1.88023	1.60474	0.909134
1681	SeMNPV_Til_1681	5.20409	4.72519	4.96449	4.96459	4.48938	5.54537	5.03452	5.02309	0.988354
1741	SeMNPV_Til_1741	1.38828	1.71064	1.33959	1.4795	1.38298	1.41442	1.62236	1.47325	1.00424
1801	SeMNPV_Til_1801	1.3608	1.39973	1.44123	1.40059	1.36946	1.45246	1.4095	1.41047	0.992993
1861	SeMNPV_Til_1861	1.62559	1.52121	1.61546	1.58742	1.54615	1.5879	1.57965	1.57123	1.0103
1921	SeMNPV_Til_1921	1.51812	1.51535	1.46945	1.50097	1.51647	1.49519	1.53985	1.51717	0.989326
1981	SeMNPV_Til_1981	1.42172	1.43844	1.37189	1.41068	1.41535	1.42375	1.44363	1.42758	0.988166
2041	SeMNPV_Til_2041	1.33117	1.37918	1.49441	1.40159	1.54815	2.67288	1.62413	1.94839	0.719357
2101	SeMNPV_Til_2101	1.54469	1.56606	1.50959	1.54012	1.54773	1.55086	1.64098	1.57986	0.974846
2161	SeMNPV_Til_2161	1.62617	1.51301	1.55043	1.5632	1.53696	1.5899	1.56963	1.5655	0.998536
2221	SeMNPV_Til_2221	1.45819	1.46299	1.41138	1.44419	1.66474	2.30327	1.45985	1.80929	0.798207
2281	SeMNPV_Til_2281	1.5129	1.50849	1.46283	1.49474	1.51349	1.48725	1.53027	1.51034	0.989673
2341	SeMNPV_Til_2341	1.41524	1.51659	1.68426	1.5387	1.87196	2.56144	1.43351	1.95564	0.7868
2401	SeMNPV_Til_2401	1.64772	1.71765	1.64296	1.66944	1.78541	1.74572	2.04668	1.85927	0.897902
2461	SeMNPV_Til_2461	1.55067	1.55872	1.50455	1.53798	2.24449	1.52961	1.58874	1.78762	0.860352
2521	SeMNPV_Til_2521	1.40251	1.40731	1.46248	1.4241	1.3891	1.46891	1.41384	1.42395	1.00011
2581	SeMNPV_Til_2581	1.87891	1.46668	1.95524	1.76694	1.71128	1.503	1.55563	1.58997	1.1113
2641	SeMNPV_Til_2641	1.43529	1.4249	1.41354	1.42458	1.55719	2.34672	2.29064	2.06485	0.689918
2701	SeMNPV_Til_2701	1.51099	1.57382	1.54914	1.54465	1.48067	1.65514	1.61562	1.58381	0.975279
2761	SeMNPV_Til_2761	1.46576	1.46936	1.41819	1.4511	1.44864	1.46457	1.47023	1.46115	0.993127
2821	SeMNPV_Til_2821	3.25627	2.9111	2.64403	2.93714	2.76695	2.50545	2.11584	2.46275	1.19263
2881	SeMNPV_Til_2881	1.43284	1.45416	1.39073	1.42591	1.42683	1.43805	1.48184	1.4489	0.984128
2941	SeMNPV_Til_2941	1.59052	1.53566	1.52879	1.55166	2.59441	1.56089	2.13963	2.09831	0.739478
3001	SeMNPV_Til_3001	2.14396	1.53578	2.14078	1.94017	1.71838	1.53542	1.55103	1.60161	1.21139
3061	SeMNPV_Til_3061	1.44956	1.40795	1.43058	1.42936	1.58275	1.41081	2.76695	1.92017	0.744395
3121	SeMNPV_Til_3121	1.6213	1.70054	1.61161	1.64449	1.50368	1.73733	1.62898	1.62333	1.01303
3181	SeMNPV_Til_3181	4.35657	3.73969	3.22028	3.77218	3.95687	4.57822	3.98448	4.17319	0.903908
3241	SeMNPV_Til_3241	1.52979	1.59352	1.52342	1.54891	1.45906	1.59033	1.52453	1.52464	1.01592
3301	SeMNPV_Til_3301	1.47176	1.41385	1.4346	1.44007	1.50342	1.36816	1.3853	1.41896	1.01487
3361	SeMNPV_Til_3361	7.27672	7.28302	8.06682	7.54219	7.91346	7.975	7.7111	7.86652	0.958771
3421	SeMNPV_Til_3421	1.7959	2.00013	1.89218	1.89607	1.50336	2.10373	1.40962	1.67224	1.13385
3481	SeMNPV_Til_3481	1.5804	1.66623	1.59862	1.61508	1.54742	1.75293	1.66378	1.65471	0.976049
3541	SeMNPV_Til_3541	4.62195	5.68458	4.73605	5.01419	4.95054	4.83218	4.70422	4.82898	1.03835
3601	SeMNPV_Til_3601	1.4791	1.35371	1.4975	1.44344	1.51865	1.35347	1.34209	1.40474	1.02755
3661	SeMNPV_Til_3661	1.83739	1.61559	1.6386	1.69719	1.63276	1.62151	1.69116	1.64848	1.02955
3721	SeMNPV_Til_3721	1.48776	1.50931	1.45457	1.48388	1.48975	1.5059	1.61559	1.53708	0.96539
3781	SeMNPV_Til_3781	1.89782	1.63331	1.9356	1.82224	1.66753	1.65982	1.56047	1.62927	1.11844
3841	SeMNPV_Til_3841	3.37643	2.46973	3.5043	3.11682	3.86392	4.56077	3.27181	3.89883	0.799425
3901	SeMNPV_Til_3901	1.60892	1.64161	1.6002	1.61691	1.55503	2.27142	3.30591	2.37745	0.680101
3961	SeMNPV_Til_3961	1.76416	1.55248	1.61219	1.64294	1.60135	1.59364	1.74613	1.64704	0.997513
4021	SeMNPV_Til_4021	1.47335	1.52099	1.4445	1.47961	1.43227	1.49938	1.4668	1.46615	1.00918
4081	SeMNPV_Til_4081	1.44621	1.46046	1.40342	1.43669	1.43509	1.44854	1.48208	1.45524	0.987257
4141	SeMNPV_Til_4141	5.23993	3.64163	4.49021	4.45726	4.89783	8.39709	4.63635	5.97709	0.745723
4201	SeMNPV_Til_4201	2.27994	1.65689	1.75003	1.89562	3.57644	4.5191	3.09637	3.73064	0.508122
4261	SeMNPV_Til_4261	12.4882	13.4536	14.6528	13.5315	14.3755	14.3805	14.3004	14.3521	0.942824
4321	SeMNPV_Til_4321	1.45422	1.41938	1.43578	1.43646	1.48577	1.42416	1.41462	1.44151	0.996496
4381	SeMNPV_Til_4381	1.56506	1.47968	1.56802	1.53759	1.58488	1.50294	1.48129	1.52304	1.00955
4441	SeMNPV_Til_4441	2.19748	2.77123	1.48639	2.1517	3.13944	2.30011	2.35033	2.59663	0.828651
4501	SeMNPV_Til_4501	5.13372	4.75242	4.59485	4.827	5.16955	6.11044	4.99812	5.42603	0.889599
4561	SeMNPV_Til_4561	1.51035	1.4842	1.48101	1.49185	1.52518	1.39648	1.39227	1.43798	1.03747
4621	SeMNPV_Til_4621	1.43512	1.39678	1.41122	1.41437	1.47351	1.36691	1.38945	1.40996	1.00313
4681	SeMNPV_Til_4681	1.47698	1.4694	1.42961	1.45866	1.4945	1.43529	1.45355	1.46112	0.998321
4741	SeMNPV_Til_4741	1.54491	1.55743	1.53718	1.54651	1.54351	1.53845	1.50867	1.53021	1.01065
4801	SeMNPV_Til_4801	1.43798	1.42095	2.90289	1.92061	1.46624	1.41813	1.41573	1.43337	1.33993
4861	SeMNPV_Til_4861	1.80977	1.85966	1.69253	1.78732	1.63092	1.81703	1.76516	1.7377	1.02855
4921	SeMNPV_Til_4921	1.43718	1.39954	1.40887	1.4152	3.43225	1.36583	1.39056	2.06288	0.686031
4981	SeMNPV_Til_4981	1.61771	1.6548	1.68154	1.65135	1.44445	1.99117	1.98898	1.8082	0.913257
5041	SeMNPV_Til_5041	1.63426	1.68798	1.67591	1.66605	1.46282	1.96367	1.47314	1.63321	1.0201
5101	SeMNPV_Til_5101	1.42869	1.41106	1.39239	1.41071	1.45862	1.37981	1.40872	1.41572	0.996464
5161	SeMNPV_Til_5161	1.56584	1.66088	1.63242	1.61971	1.49098	1.85247	1.62799	1.65715	0.977411
5221	SeMNPV_Til_5221	1.60877	1.6622	1.64041	1.63713	1.46346	1.85966	1.49842	1.60718	1.01863
5281	SeMNPV_Til_5281	1.31921	1.32393	1.53245	1.39186	1.3053	1.46918	2.08661	1.62036	0.858982
5341	SeMNPV_Til_5341	1.39883	1.43679	1.40021	1.41195	1.41487	1.43703	1.52102	1.45764	0.968653
5401	SeMNPV_Til_5401	1.39446	1.96981	1.34884	1.57104	1.38189	1.41725	1.72317	1.50743	1.04219
5461	SeMNPV_Til_5461	2.33192	1.32409	2.40943	2.02181	2.7865	1.46734	1.34463	1.86616	1.08341
5521	SeMNPV_Til_5521	3.24804	2.88237	3.4188	3.18307	3.02745	2.36345	4.22642	3.20577	0.992919
5581	SeMNPV_Til_5581	1.78605	1.68888	1.63979	1.70491	1.6377	1.67288	1.72143	1.67733	1.01644
5641	SeMNPV_Til_5641	1.41447	1.44913	2.35805	1.74055	1.42553	2.33651	1.53065	1.76423	0.986577
5701	SeMNPV_Til_5701	1.49169	1.54721	1.46644	1.50178	1.44104	1.51902	1.48296	1.48101	1.01403
5761	SeMNPV_Til_5761	1.49633	1.45514	1.45826	1.46991	1.52348	1.38309	1.3917	1.43275	1.02593
5821	SeMNPV_Til_5821	1.43787	1.39596	1.41152	1.41512	1.47605	1.3619	1.69446	1.5108	0.936668
5881	SeMNPV_Til_5881	1.52583	1.50809	1.48131	1.50508	1.50157	1.51779	1.55807	1.52581	0.986411
5941	SeMNPV_Til_5941	1.37569	1.42389	1.28355	1.36104	1.37704	1.39603	1.43825	1.40377	0.96956
6001	SeMNPV_Til_6001	1.42289	1.45949	1.50269	1.46169	1.39227	1.54576	1.43456	1.45753	1.00286
6061	SeMNPV_Til_6061	1.47392	1.43773	1.4611	1.45758	1.50674	2.82363	2.26682	2.19906	0.66282
6121	SeMNPV_Til_6121	2.51923	3.6191	3.66571	3.26801	3.81686	3.1697	3.83203	3.6062	0.906221
6181	SeMNPV_Til_6181	2.38118	1.78589	1.85795	2.00834	1.57148	1.914	1.46527	1.65025	1.21699
6241	SeMNPV_Til_6241	13.1338	13.1877	13.125	13.1488	12.8754	13.323	12.8602	13.0195	1.00993
6301	SeMNPV_Til_6301	1.47086	1.47771	1.452	1.46686	1.47953	1.54379	2.68255	1.90196	0.771236
6361	SeMNPV_Til_6361	1.69172	1.41447	1.37257	1.49292	1.8654	1.39178	1.41475	1.55731	0.958653
6421	SeMNPV_Til_6421	1.64098	1.71848	1.63387	1.66445	1.52247	1.7537	1.4832	1.58646	1.04916
6481	SeMNPV_Til_6481	1.51777	1.56947	1.51318	1.53347	1.45394	1.56439	1.52696	1.5151	1.01213
6541	SeMNPV_Til_6541	2.34086	1.64391	1.42071	1.80183	3.67259	1.47744	2.22154	2.45719	0.733287
6601	SeMNPV_Til_6601	1.54694	1.83798	1.48973	1.62489	1.42311	1.67122	1.43439	1.50957	1.07639
6661	SeMNPV_Til_6661	1.4913	1.47178	1.6563	1.53979	1.33239	1.86559	1.39864	1.53221	1.00495
6721	SeMNPV_Til_6721	4.97003	4.96287	5.27201	5.0683	5.24062	5.16617	5.01063	5.13914	0.986216
6781	SeMNPV_Til_6781	1.34788	1.38638	1.45133	1.3952	1.34952	1.45768	1.38601	1.39773	0.998187
6841	SeMNPV_Til_6841	1.60188	1.64147	1.66001	1.63445	1.44651	1.93017	1.47698	1.61789	1.01024
6901	SeMNPV_Til_6901	1.45324	1.46061	1.40789	1.44058	1.44156	1.4481	1.45911	1.44959	0.993785
6961	SeMNPV_Til_6961	1.50269	1.49329	1.45464	1.48354	1.47609	1.49898	1.51283	1.49596	0.991696
7021	SeMNPV_Til_7021	1.40231	1.43492	1.42751	1.42158	1.4167	1.46833	1.50482	1.46328	0.971498
7081	SeMNPV_Til_7081	1.52333	1.58934	1.51322	1.54196	1.45647	1.56835	1.5175	1.51411	1.0184
7141	SeMNPV_Til_7141	1.63359	1.62021	1.6384	1.63073	1.58471	1.61633	1.54236	1.58113	1.03137
7201	SeMNPV_Til_7201	1.68946	2.56309	1.83904	2.03053	2.12284	1.41629	2.31837	1.9525	1.03996
7261	SeMNPV_Til_7261	1.53232	1.53756	1.48695	1.51894	1.53391	1.50483	1.5568	1.53185	0.991578
7321	SeMNPV_Til_7321	1.55162	1.41266	1.56516	1.50982	1.58476	1.46303	1.41452	1.48744	1.01505
7381	SeMNPV_Til_7381	1.72218	1.68901	1.61996	1.67705	1.62348	5.66392	1.71231	2.9999	0.559035
7441	SeMNPV_Til_7441	1.32908	1.35296	1.494	1.39201	1.32272	1.4465	1.33688	1.3687	1.01703
7501	SeMNPV_Til_7501	3.55851	1.42326	1.25812	2.07996	1.37149	3.40213	2.16715	2.31359	0.899021
7561	SeMNPV_Til_7561	4.03217	4.71157	4.39462	4.37946	3.71302	2.84187	3.30061	3.28517	1.3331
7621	SeMNPV_Til_7621	1.415	1.44798	1.46836	1.44378	1.40842	1.51068	1.46258	1.46056	0.98851
7681	SeMNPV_Til_7681	1.46381	1.46881	1.41597	1.44953	1.45412	1.45655	1.46691	1.45919	0.993377
7741	SeMNPV_Til_7741	1.60427	1.50466	1.61817	1.5757	1.60588	1.52488	1.52492	1.55189	1.01534
7801	SeMNPV_Til_7801	4.48194	4.10049	4.42542	4.33595	3.94684	5.02578	4.5747	4.51577	0.960178
7861	SeMNPV_Til_7861	1.43572	1.63171	1.41205	1.49316	1.4171	1.52771	1.49753	1.48078	1.00836
7921	SeMNPV_Til_7921	1.60978	2.12324	1.5119	1.74831	3.21567	3.00048	4.00281	3.40632	0.513254
7981	SeMNPV_Til_7981	5.2554	4.74314	5.02942	5.00932	5.06635	5.45492	5.2589	5.26006	0.952332
8041	SeMNPV_Til_8041	2.02191	1.70072	2.02264	1.91509	1.67692	1.85821	1.44595	1.66036	1.15342
8101	SeMNPV_Til_8101	1.51376	1.4901	1.47975	1.49454	1.5326	1.41513	1.40425	1.45066	1.03025
8161	SeMNPV_Til_8161	2.66118	1.63939	2.45005	2.25021	1.95735	2.67251	2.77277	2.46754	0.911923
8221	SeMNPV_Til_8221	1.62086	1.66502	1.57399	1.61996	1.58435	1.66186	1.69136	1.64586	0.984263
8281	SeMNPV_Til_8281	1.39851	1.98069	1.37465	1.58462	1.40416	1.42401	1.50782	1.44533	1.09637
8341	SeMNPV_Til_8341	1.53406	1.56891	1.52499	1.54265	1.51262	1.54248	1.49333	1.51614	1.01749
8401	SeMNPV_Til_8401	1.53857	1.53815	1.49834	1.52502	1.532	1.53242	1.61849	1.56097	0.976968
8461	SeMNPV_Til_8461	1.58717	1.65415	1.58437	1.60857	1.47377	1.7162	1.51647	1.56881	1.02534
8521	SeMNPV_Til_8521	3.4092	1.62837	1.28456	2.10738	1.3777	2.2462	3.48489	2.3696	0.889339
8581	SeMNPV_Til_8581	1.44842	2.0556	2.74448	2.08284	1.40684	1.51767	1.65664	1.52705	1.36396
8641	SeMNPV_Til_8641	1.47689	2.1656	2.4613	2.0346	1.47504	1.49295	1.5995	1.5225	1.33636
8701	SeMNPV_Til_8701	1.52664	1.54056	1.49581	1.521	1.53303	1.46103	1.47499	1.48968	1.02103
8761	SeMNPV_Til_8761	1.44259	1.47926	1.42727	1.44971	1.425	1.47187	1.51429	1.47039	0.985936
8821	SeMNPV_Til_8821	1.45729	1.34753	1.46184	1.42222	1.4918	1.32985	1.3288	1.38348	1.028
8881	SeMNPV_Til_8881	9.782	9.41259	8.83627	9.34362	9.67343	9.88515	9.15079	9.56979	0.976366
8941	SeMNPV_Til_8941	1.54541	1.52981	1.49876	1.52466	1.51342	1.53355	1.55896	1.53531	0.993061
9001	SeMNPV_Til_9001	1.46936	1.4117	1.43239	1.43782	1.50119	1.36587	1.99276	1.61994	0.887576
9061	SeMNPV_Til_9061	1.45887	1.47929	1.46798	1.46871	2.94029	1.49921	1.50431	1.98127	0.741299
9121	SeMNPV_Til_9121	3.42249	1.43501	1.39843	2.08531	1.46	1.41273	1.43141	1.43472	1.45347
9181	SeMNPV_Til_9181	1.52337	1.51392	1.518	1.51843	1.53663	1.51199	1.49235	1.51366	1.00315
9241	SeMNPV_Til_9241	1.71649	1.36967	1.86484	1.65033	1.69283	2.6732	1.69317	2.01973	0.817105
9301	SeMNPV_Til_9301	2.57767	2.16112	1.38366	2.04082	2.55022	1.47518	2.93603	2.32048	0.879481
9361	SeMNPV_Til_9361	1.44673	1.46845	1.40713	1.44077	1.44061	1.4559	1.53061	1.4757	0.976327
9421	SeMNPV_Til_9421	1.58651	1.60972	1.68441	1.62688	1.41672	1.99989	1.44688	1.62116	1.00353
9481	SeMNPV_Til_9481	1.63946	1.47392	1.72494	1.61277	1.92421	1.41573	1.92228	1.75408	0.919443
9541	SeMNPV_Til_9541	1.48033	1.47173	1.46635	1.4728	1.50038	1.47099	1.45216	1.47451	0.998843
9601	SeMNPV_Til_9601	1.62642	1.49228	1.64977	1.58949	1.6244	1.51958	1.90614	1.68337	0.944227
9661	SeMNPV_Til_9661	1.39574	1.38298	1.55292	1.44388	1.60147	1.52777	1.93891	1.68938	0.854678
9721	SeMNPV_Til_9721	1.33141	1.36008	1.48374	1.39174	1.32899	1.44495	1.34814	1.37403	1.01289
9781	SeMNPV_Til_9781	1.38887	1.43619	1.33885	1.38797	1.39644	1.41385	1.48724	1.43251	0.968909
9841	SeMNPV_Til_9841	1.56111	1.52168	1.51153	1.53144	1.51459	1.54668	1.55287	1.53805	0.995703
9901	SeMNPV_Til_9901	1.40009	1.44392	1.37895	1.40766	1.41413	2.21297	1.52901	1.71871	0.819021
9961	SeMNPV_Til_9961	3.18649	2.59231	1.55281	2.44387	2.63624	1.51627	2.63624	2.26292	1.07996
10021	SeMNPV_Til_10021	1.63686	1.52954	2.27994	1.81545	1.55462	1.58965	1.59218	1.57882	1.14988
10081	SeMNPV_Til_10081	1.59799	1.38249	1.64672	1.5424	1.61753	1.43016	1.39488	1.48086	1.04156
10141	SeMNPV_Til_10141	1.53928	1.45193	1.54553	1.51225	1.76393	1.48159	1.44703	1.56418	0.966797
10201	SeMNPV_Til_10201	1.58578	1.53764	2.45246	1.85863	2.23281	2.5426	1.58285	2.11942	0.876951
10261	SeMNPV_Til_10261	2.46198	2.32143	2.37546	2.38629	2.64192	2.40656	2.31173	2.45341	0.972645
10321	SeMNPV_Til_10321	1.50655	1.55755	1.49021	1.5181	1.74557	1.52618	1.46729	1.57968	0.961019
10381	SeMNPV_Til_10381	1.37738	1.42037	1.41299	1.40358	1.37927	4.79087	1.42727	2.53247	0.554232
10441	SeMNPV_Til_10441	1.39239	1.44045	1.4132	1.41535	1.40392	2.40589	1.51249	1.7741	0.797784
10501	SeMNPV_Til_10501	1.45303	1.71937	1.46793	1.54678	2.39354	1.29999	1.28855	1.66069	0.931406
10561	SeMNPV_Til_10561	1.50383	1.494	1.45534	1.48439	2.45225	1.49947	1.51372	1.82181	0.814784
10621	SeMNPV_Til_10621	1.40293	1.4375	1.40182	1.41408	1.41266	1.43636	1.51073	1.45325	0.973046
10681	SeMNPV_Til_10681	1.51532	1.49703	1.47578	1.49604	1.5379	1.43263	1.42755	1.46603	1.02047
10741	SeMNPV_Til_10741	2.58917	1.47133	3.03732	2.36594	1.84633	1.9186	2.18344	1.98279	1.19324
10801	SeMNPV_Til_10801	1.51842	1.54932	1.49474	1.52082	1.50979	1.45507	1.47654	1.48047	1.02726
10861	SeMNPV_Til_10861	1.62116	1.65443	1.69653	1.65737	2.36104	2.66337	1.45432	2.15958	0.767452
10921	SeMNPV_Til_10921	1.45344	1.46133	1.48895	1.4679	1.42493	1.50535	1.46479	1.46503	1.00197
10981	SeMNPV_Til_10981	1.47448	1.47001	1.42671	1.45707	2.46511	1.4383	1.45913	1.78752	0.815135
11041	SeMNPV_Til_11041	2.21169	1.44736	1.4375	1.69885	1.47788	1.44138	1.43547	1.45158	1.17035
11101	SeMNPV_Til_11101	1.58706	1.54784	1.52736	1.55408	1.55211	1.55922	1.61035	1.57389	0.987412
11161	SeMNPV_Til_11161	1.57603	1.54872	1.57143	1.56539	1.57124	1.54327	1.52922	1.54791	1.01129
11221	SeMNPV_Til_11221	1.55793	1.65427	1.64449	1.6189	1.46635	1.89609	1.60972	1.65739	0.976776
11281	SeMNPV_Til_11281	1.43394	1.44176	1.38945	1.42172	1.44308	1.5228	1.44107	1.46898	0.967825
11341	SeMNPV_Til_11341	1.7928	1.72597	1.8428	1.78719	1.59899	1.78445	1.51708	1.63351	1.09408
11401	SeMNPV_Til_11401	1.46318	1.45059	1.53869	1.48415	1.40408	1.54811	2.37717	1.77645	0.835458
11461	SeMNPV_Til_11461	1.3917	1.42478	1.41492	1.41047	1.40834	1.44404	1.4858	1.44606	0.975387
11521	SeMNPV_Til_11521	1.36463	2.03969	1.40749	1.60394	1.79207	1.38229	1.71276	1.62904	0.98459
11581	SeMNPV_Til_11581	1.48812	1.53394	1.51608	1.51271	1.47539	1.58096	1.61219	1.55618	0.972068
11641	SeMNPV_Til_11641	1.41361	1.42968	1.35908	1.40079	1.41748	1.41236	1.4319	1.42058	0.986071
11701	SeMNPV_Til_11701	1.47878	1.40324	1.45209	1.4447	1.50025	1.32908	1.3472	1.39218	1.03773
11761	SeMNPV_Til_11761	1.44302	1.45363	1.39802	1.43155	1.43608	1.43825	1.45137	1.4419	0.992826
11821	SeMNPV_Til_11821	1.43589	1.46934	1.40477	1.43667	1.44054	1.45593	1.55611	1.48419	0.96798
11881	SeMNPV_Til_11881	8.57797	8.07556	8.70074	8.45142	8.65431	9.44965	8.48007	8.86134	0.953741
11941	SeMNPV_Til_11941	1.46061	1.42596	1.41867	1.43508	1.49088	1.38747	1.40688	1.42841	1.00467
12001	SeMNPV_Til_12001	1.44461	1.49272	1.41398	1.45044	1.41687	1.46818	2.14936	1.67814	0.864314
12061	SeMNPV_Til_12061	1.51156	1.49892	1.46558	1.49202	2.88538	1.45207	1.46441	1.93395	0.771489
12121	SeMNPV_Til_12121	1.62719	1.65958	2.41455	1.90044	3.50399	3.47916	2.79911	3.26075	0.582822
12181	SeMNPV_Til_12181	1.88459	1.36816	2.00762	1.75346	1.7257	1.36881	1.45923	1.51791	1.15518
12241	SeMNPV_Til_12241	5.69641	5.83661	6.62179	6.0516	6.31174	6.59883	6.29536	6.40197	0.945271
12301	SeMNPV_Til_12301	1.62191	1.67798	1.61394	1.63794	1.54304	1.67417	1.49978	1.57233	1.04173
12361	SeMNPV_Til_12361	1.53751	1.51389	1.49264	1.51468	1.50401	1.52807	1.54177	1.52462	0.993484
12421	SeMNPV_Til_12421	3.39812	1.5018	1.55395	2.15129	1.53202	3.82397	3.92888	3.09496	0.695095
12481	SeMNPV_Til_12481	2.78146	2.94766	2.70845	2.81252	3.40749	4.50781	4.18841	4.03457	0.697106
12541	SeMNPV_Til_12541	3.74784	3.5091	2.85705	3.37133	3.19432	3.87206	2.24725	3.10454	1.08593
12601	SeMNPV_Til_12601	1.40381	1.43795	1.40297	1.41491	1.41282	1.43685	1.50968	1.45311	0.973709
12661	SeMNPV_Til_12661	1.5445	1.5767	1.50614	1.54245	1.53504	1.51054	1.58618	1.54392	0.999046
12721	SeMNPV_Til_12721	1.63124	1.66687	1.55307	1.61706	5.18693	1.59048	1.62854	2.80198	0.577113
12781	SeMNPV_Til_12781	1.62171	1.51318	1.54852	1.56114	1.72648	1.59044	1.68563	1.66751	0.936206
12841	SeMNPV_Til_12841	1.38917	1.54668	1.79731	1.57772	1.39799	3.52574	1.49996	2.14123	0.736831
12901	SeMNPV_Til_12901	1.6916	1.60763	1.71445	1.67123	1.6243	1.61546	1.56078	1.60018	1.0444
12961	SeMNPV_Til_12961	1.45071	1.48991	1.50556	1.48206	1.43389	1.5568	1.52678	1.50582	0.984218
13021	SeMNPV_Til_13021	1.33941	1.37578	1.46072	1.39197	1.72267	3.25001	1.37137	2.11469	0.65824
13081	SeMNPV_Til_13081	1.43683	1.44831	1.39195	1.4257	1.43854	1.42957	1.44603	1.43805	0.991411
13141	SeMNPV_Til_13141	1.40482	2.43618	1.35878	1.73326	1.42704	1.39144	1.41674	1.41174	1.22775
13201	SeMNPV_Til_13201	1.74494	1.62965	2.39602	1.92354	1.5476	1.61442	2.68612	1.94938	0.986741
13261	SeMNPV_Til_13261	1.50019	1.53273	5.74417	2.9257	1.44753	1.54347	1.52838	1.50646	1.9421
13321	SeMNPV_Til_13321	4.71897	2.58444	4.53511	3.94617	3.50969	2.83027	2.65131	2.99709	1.31667
13381	SeMNPV_Til_13381	1.51619	1.4035	1.52665	1.48212	1.56108	1.43731	1.40154	1.46664	1.01055
13441	SeMNPV_Til_13441	1.53367	1.60812	1.51886	1.55355	1.46548	1.57535	1.48746	1.50943	1.02923
13501	SeMNPV_Til_13501	1.48484	1.34185	1.50968	1.44546	2.77487	1.34611	2.04516	2.05538	0.703255
13561	SeMNPV_Til_13561	1.52846	1.56164	1.55007	1.54673	1.45129	1.6276	1.52253	1.5338	1.00842
13621	SeMNPV_Til_13621	1.45311	1.45422	1.40742	1.43825	1.46145	1.4286	1.44876	1.44627	0.994454
13681	SeMNPV_Til_13681	1.3782	1.43744	1.56057	1.45874	1.37108	3.32198	1.44541	2.04616	0.712916
13741	SeMNPV_Til_13741	1.78886	2.88707	3.04089	2.57227	2.38642	2.73273	1.42707	2.18207	1.17882
13801	SeMNPV_Til_13801	1.54488	1.51604	1.49892	1.51995	1.51326	1.52996	1.56471	1.53598	0.989563
13861	SeMNPV_Til_13861	1.44351	1.37172	1.42493	1.41339	1.47589	1.32029	1.34116	1.37911	1.02485
13921	SeMNPV_Til_13921	1.40937	2.10191	1.48497	1.66541	1.53988	1.39159	1.41902	1.45017	1.14843
13981	SeMNPV_Til_13981	1.4331	1.47278	1.50987	1.47192	1.40516	1.55946	1.45089	1.47184	1.00005
14041	SeMNPV_Til_14041	1.33103	2.32667	1.52829	1.72866	2.06444	1.47409	1.32219	1.62024	1.06692
14101	SeMNPV_Til_14101	1.67282	1.75215	1.73833	1.7211	1.53172	1.82057	1.4756	1.6093	1.06947
14161	SeMNPV_Til_14161	5.90236	1.50728	1.43441	2.94801	1.43138	1.48602	1.45012	1.45584	2.02495
14221	SeMNPV_Til_14221	1.45384	1.4012	1.43801	1.43102	1.4931	1.40115	1.39754	1.4306	1.00029
14281	SeMNPV_Til_14281	1.52004	1.51608	1.47171	1.50261	3.05313	1.50368	1.54311	2.03331	0.738997
14341	SeMNPV_Til_14341	1.40374	1.43643	1.51411	1.45142	1.35428	1.55791	1.39408	1.43542	1.01115
14401	SeMNPV_Til_14401	1.60383	1.53012	1.53747	1.55714	2.52977	1.57382	2.32015	2.14125	0.727212
14461	SeMNPV_Til_14461	1.45826	1.5017	1.42897	1.46297	1.43072	1.4806	1.44732	1.45288	1.00695
14521	SeMNPV_Til_14521	1.42111	2.20012	1.37362	1.66495	1.4384	1.40366	1.42651	1.42286	1.17014
14581	SeMNPV_Til_14581	1.47357	1.47266	1.52908	1.49177	1.42299	1.54581	1.45185	1.47355	1.01237
14641	SeMNPV_Til_14641	1.56057	1.58846	1.52182	1.55695	1.55577	1.56833	1.65155	1.59188	0.978056
14701	SeMNPV_Til_14701	1.47479	1.47619	1.42846	1.45981	1.4536	1.47635	1.49337	1.47444	0.99008
14761	SeMNPV_Til_14761	1.43499	1.47072	1.40759	1.43777	1.44168	1.45941	1.56521	1.48877	0.965744
14821	SeMNPV_Til_14821	1.47607	1.47707	1.43035	1.46116	1.45487	1.47797	1.49915	1.47733	0.989056
14881	SeMNPV_Til_14881	1.5014	1.47328	1.45981	1.47816	1.52858	1.41631	1.40965	1.45151	1.01836
14941	SeMNPV_Til_14941	1.44141	1.38811	1.41592	1.41514	1.47965	1.35173	1.37505	1.40214	1.00927
15001	SeMNPV_Til_15001	1.52826	1.50909	1.48306	1.5068	1.49834	1.52074	1.53571	1.51826	0.992452
15061	SeMNPV_Til_15061	2.07235	1.88272	1.75997	1.90501	1.6562	1.73046	1.84259	1.74308	1.0929
15121	SeMNPV_Til_15121	1.92475	1.69116	1.948	1.85463	1.63359	1.76089	1.52346	1.63931	1.13135
15181	SeMNPV_Til_15181	13.153	12.8537	12.7271	12.9113	12.7388	13.0536	12.9337	12.9087	1.0002
15241	SeMNPV_Til_15241	1.45823	1.45732	1.41174	1.44243	1.46776	1.43048	1.45055	1.4496	0.995056
15301	SeMNPV_Til_15301	10.0778	10.0235	10.0228	10.0414	9.85325	9.97914	9.965	9.93246	1.01097
15361	SeMNPV_Til_15361	1.47524	1.41036	1.44138	1.44233	1.50513	2.29815	1.37436	1.72588	0.835705
15421	SeMNPV_Til_15421	1.49753	1.49517	1.44857	1.48042	1.4871	1.48681	1.51396	1.49595	0.989617
15481	SeMNPV_Til_15481	1.44501	1.38138	1.42972	1.4187	1.48602	2.48823	1.37226	1.78217	0.796055
15541	SeMNPV_Til_15541	4.18499	4.34966	5.06843	4.53436	4.29958	3.90487	4.14693	4.11713	1.10134
15601	SeMNPV_Til_15601	1.4728	1.52024	1.5737	1.52225	1.3866	1.71191	1.43072	1.50974	1.00828
15661	SeMNPV_Til_15661	1.51554	1.54412	1.48826	1.51597	1.52032	1.53344	1.6334	1.56239	0.970293
15721	SeMNPV_Til_15721	1.49597	1.53696	1.4869	1.50661	1.44554	1.53022	1.52484	1.5002	1.00427
15781	SeMNPV_Til_15781	1.69395	1.85247	1.70571	1.75071	1.56978	1.94819	1.71016	1.74271	1.00459
15841	SeMNPV_Til_15841	7.97894	8.14408	8.08698	8.07	7.74628	7.89365	7.79963	7.81319	1.03287
15901	SeMNPV_Til_15901	1.43164	1.40354	2.00181	1.61233	1.46763	4.21516	4.24068	3.30783	0.48743
15961	SeMNPV_Til_15961	1.97969	1.8373	1.71511	1.84404	1.66894	1.72903	1.80198	1.73332	1.06388
16021	SeMNPV_Til_16021	3.9502	4.00648	3.47724	3.81131	3.87677	4.28679	3.37478	3.84611	0.990951
16081	SeMNPV_Til_16081	1.41984	1.45025	1.37573	1.41528	1.42	1.43009	1.50469	1.45159	0.974984
16141	SeMNPV_Til_16141	1.63208	1.58947	1.55491	1.59215	1.57614	1.59631	1.64036	1.60427	0.992449
16201	SeMNPV_Til_16201	2.10807	1.82932	1.73733	1.89157	1.67598	1.67713	1.83818	1.73043	1.09312
16261	SeMNPV_Til_16261	1.51593	1.51469	1.58349	1.53803	1.4249	1.66272	1.46359	1.51707	1.01382
16321	SeMNPV_Til_16321	1.53077	1.59149	1.52685	1.5497	1.53489	1.60217	1.65081	1.59596	0.971019
16381	SeMNPV_Til_16381	1.27506	1.26972	1.55709	1.36729	2.29245	1.47036	2.90259	2.2218	0.615398
16441	SeMNPV_Til_16441	1.47694	1.45952	1.43189	1.45611	1.50147	1.42169	1.43212	1.45176	1.003
16501	SeMNPV_Til_16501	2.73658	1.86205	1.73372	2.11078	1.66614	1.74536	1.81589	1.74246	1.21138
16561	SeMNPV_Til_16561	1.63725	1.62831	1.56431	1.60996	2.31253	1.62277	1.67292	1.86941	0.861213
16621	SeMNPV_Til_16621	1.3905	2.08935	1.43647	1.63877	1.70769	1.4727	1.97023	1.71687	0.954512
16681	SeMNPV_Til_16681	2.67474	2.15654	1.40126	2.07752	1.44379	1.42255	1.42738	1.43124	1.45155
16741	SeMNPV_Til_16741	1.42065	1.41384	1.38987	1.40812	1.44705	1.39887	1.41309	1.41967	0.991863
16801	SeMNPV_Til_16801	1.86426	1.69712	1.65995	1.74044	1.65332	1.67076	1.73759	1.68722	1.03154
16861	SeMNPV_Til_16861	1.62424	1.63378	1.56033	1.60611	1.58534	1.62565	1.67685	1.62928	0.985781
16921	SeMNPV_Til_16921	2.25227	2.56482	2.69548	2.50419	3.24284	1.56195	3.27241	2.6924	0.930097
16981	SeMNPV_Til_16981	5.81259	1.52109	1.52651	2.9534	1.54598	1.51906	3.86643	2.31049	1.27825
17041	SeMNPV_Til_17041	1.69582	1.59631	1.58864	1.62692	1.93185	1.61698	1.65219	1.73367	0.938426
17101	SeMNPV_Til_17101	1.4691	1.47418	1.42336	1.45555	1.45045	1.4722	1.50405	1.47556	0.986436
17161	SeMNPV_Til_17161	1.65463	1.69253	1.65285	1.66667	1.56043	1.69725	1.51083	1.58951	1.04854
17221	SeMNPV_Til_17221	1.53355	1.5624	1.50502	1.53366	1.54075	1.54796	1.64126	1.57666	0.972727
17281	SeMNPV_Til_17281	1.29542	1.33025	2.60373	1.74313	1.29884	1.45474	1.27743	1.34367	1.29729
17341	SeMNPV_Til_17341	1.56109	1.60682	1.5473	1.57174	1.52492	1.57643	1.50028	1.53388	1.02468
17401	SeMNPV_Til_17401	1.60991	1.69053	1.60067	1.6337	1.56833	1.73759	1.68753	1.66448	0.981508
17461	SeMNPV_Til_17461	1.49107	1.49661	1.47823	1.48863	1.49742	1.49098	1.46658	1.48499	1.00245
17521	SeMNPV_Til_17521	1.47829	1.52592	1.4513	1.48517	1.43877	1.64557	1.45857	1.5143	0.98076
17581	SeMNPV_Til_17581	1.39304	1.42377	1.32588	1.3809	1.39446	1.40354	1.42782	1.40861	0.980329
17641	SeMNPV_Til_17641	1.41509	1.46335	2.5069	1.79511	1.39768	1.43225	4.68529	2.50507	0.71659
17701	SeMNPV_Til_17701	1.42939	3.59356	1.41227	2.14507	1.41841	1.45528	2.12178	1.66516	1.28821
17761	SeMNPV_Til_17761	4.58016	4.33793	4.76591	4.56133	4.1192	4.63859	3.95687	4.23822	1.07624
17821	SeMNPV_Til_17821	1.60741	1.66708	1.62928	1.63459	1.46882	1.82523	1.50415	1.5994	1.022
17881	SeMNPV_Til_17881	1.46184	1.42115	1.51512	1.46604	2.00298	1.51196	1.41221	1.64238	0.892628
17941	SeMNPV_Til_17941	1.4125	1.40501	1.4891	1.43554	1.38213	1.48404	1.40584	1.424	1.0081
18001	SeMNPV_Til_18001	1.49015	1.48902	1.4412	1.47346	1.48748	1.47459	1.50132	1.4878	0.990362
18061	SeMNPV_Til_18061	1.43792	1.39265	1.41674	1.41577	1.47818	1.36611	1.3851	1.4098	1.00424
18121	SeMNPV_Til_18121	4.19153	3.63576	4.0661	3.96446	3.86577	4.02155	4.04205	3.97646	0.996984
18181	SeMNPV_Til_18181	1.46344	1.49288	1.4559	1.47074	1.43465	1.49698	3.56954	2.16706	0.678681
18241	SeMNPV_Til_18241	6.38076	6.16102	6.15431	6.23203	6.0756	6.85408	6.06775	6.33248	0.984137
18301	SeMNPV_Til_18301	1.45397	1.49247	1.49554	1.48066	1.44231	1.5452	1.55064	1.51272	0.978808
18361	SeMNPV_Til_18361	1.51409	1.50997	1.46424	1.4961	1.51199	1.49141	1.73989	1.5811	0.946243
18421	SeMNPV_Til_18421	1.36683	1.42391	1.23942	1.34339	1.36925	1.38923	1.4378	1.39876	0.960414
18481	SeMNPV_Til_18481	1.39053	1.42104	1.41785	1.40981	1.40584	1.44472	1.47418	1.44158	0.977958
18541	SeMNPV_Til_18541	1.50807	2.00275	1.48852	1.66645	1.45337	1.53462	1.47245	1.48681	1.12082
18601	SeMNPV_Til_18601	1.64425	1.64442	1.5713	1.61999	1.59392	2.37352	2.21867	2.06204	0.785625
18661	SeMNPV_Til_18661	1.4682	1.39467	2.47967	1.78085	1.51109	3.24775	1.38923	2.04936	0.868978
18721	SeMNPV_Til_18721	1.41384	1.45528	1.39137	1.42016	1.40887	1.78321	1.50502	1.5657	0.907045
18781	SeMNPV_Til_18781	2.2034	2.3978	1.41056	2.00392	1.47863	1.3683	1.39279	1.41324	1.41796
18841	SeMNPV_Til_18841	1.72409	1.80085	1.76724	1.76406	1.92125	2.02441	1.44569	1.79711	0.981606
18901	SeMNPV_Til_18901	2.63242	3.64032	3.60689	3.29321	2.92003	3.49409	3.59265	3.33559	0.987295
18961	SeMNPV_Til_18961	1.54885	1.62345	1.56009	1.57746	1.53358	1.67147	1.6534	1.61948	0.974053
19021	SeMNPV_Til_19021	1.72049	1.56099	2.22485	1.83544	2.08905	2.71391	2.20477	2.33591	0.785752
19081	SeMNPV_Til_19081	4.37925	1.33833	1.43456	2.38404	1.72122	2.17221	1.92527	1.93957	1.22916
19141	SeMNPV_Til_19141	1.40458	3.4518	2.34638	2.40092	1.63119	2.21542	2.46559	2.10406	1.14109
19201	SeMNPV_Til_19201	1.81042	1.39451	1.93765	1.71419	2.07212	1.43441	1.4748	1.66044	1.03237
19261	SeMNPV_Til_19261	1.37565	1.43496	1.30376	1.37146	1.36701	1.40416	1.42864	1.39994	0.979656
19321	SeMNPV_Til_19321	1.63932	1.53138	1.55655	1.57575	1.55608	1.59027	1.59464	1.58033	0.997103
19381	SeMNPV_Til_19381	1.49033	1.53197	1.46881	1.49704	1.45756	1.50982	1.46055	1.47598	1.01427
19441	SeMNPV_Til_19441	1.36373	2.46511	1.20895	1.67926	1.36683	2.78369	2.01597	2.0555	0.816961
19501	SeMNPV_Til_19501	1.38493	3.01024	2.21867	2.20462	2.05275	2.16604	1.41785	1.87888	1.17337
19561	SeMNPV_Til_19561	2.59379	1.49622	1.45655	1.84885	1.48112	1.50008	1.51541	1.49887	1.2335
19621	SeMNPV_Til_19621	2.8875	3.26818	2.82713	2.99427	2.89382	2.64366	3.53033	3.0226	0.990626
19681	SeMNPV_Til_19681	1.49052	1.48523	2.24309	1.73962	1.50231	1.45694	1.4799	1.47972	1.17564
19741	SeMNPV_Til_19741	1.42123	1.44974	1.37607	1.41568	1.41961	1.43003	1.49479	1.44814	0.977584
19801	SeMNPV_Til_19801	1.55146	1.39774	1.57069	1.50663	2.80872	1.44224	1.40009	1.88368	0.799832
19861	SeMNPV_Til_19861	1.60872	1.51984	1.54143	1.55667	1.52809	1.58767	1.56786	1.56121	0.997091
19921	SeMNPV_Til_19921	1.42414	2.11232	1.41141	1.64929	1.41762	1.44951	1.51052	1.45922	1.13026
19981	SeMNPV_Til_19981	1.55035	1.6034	1.53721	1.56365	1.50919	1.56967	1.49199	1.52361	1.02628
20041	SeMNPV_Til_20041	2.00013	1.36521	2.0955	1.82028	1.75115	1.35164	1.49307	1.53195	1.18821
20101	SeMNPV_Til_20101	1.38382	1.4361	1.33551	1.38514	1.39137	1.438	1.98966	1.60634	0.862295
20161	SeMNPV_Til_20161	1.53109	3.34091	2.48823	2.45341	1.57087	1.40887	1.37551	1.45175	1.68996
20221	SeMNPV_Til_20221	1.41043	1.45246	1.37279	1.41189	1.40206	1.42408	2.38177	1.73597	0.813316
20281	SeMNPV_Til_20281	2.57982	1.47313	1.38549	1.81281	1.64641	1.43935	1.4464	1.51072	1.19997
20341	SeMNPV_Til_20341	1.47552	1.3531	1.49228	1.4403	1.51369	1.34943	1.34039	1.40117	1.02792
20401	SeMNPV_Til_20401	1.51237	1.50285	1.46633	1.49385	1.49192	1.50827	1.55916	1.51978	0.982937
20461	SeMNPV_Til_20461	1.51105	1.49873	1.46419	1.49133	1.8284	1.50643	1.54088	1.62524	0.917605
20521	SeMNPV_Til_20521	1.47744	1.47826	1.43043	1.46204	1.91457	1.47584	1.48204	1.62415	0.900188
20581	SeMNPV_Til_20581	1.32029	2.07813	1.50259	1.63367	2.90138	4.16184	1.30899	2.79074	0.58539
20641	SeMNPV_Til_20641	1.59273	1.66642	1.58162	1.61359	1.48119	1.70721	1.50853	1.56565	1.03062
20701	SeMNPV_Til_20701	1.39754	1.38195	1.57479	1.45143	1.32642	1.55842	1.36623	1.41702	1.02428
20761	SeMNPV_Til_20761	1.38195	1.42082	1.30225	1.36834	1.38398	1.39625	1.42637	1.4022	0.975855
20821	SeMNPV_Til_20821	1.37975	1.42074	4.53645	2.44565	1.38173	3.41565	2.71914	2.50551	0.976108
20881	SeMNPV_Til_20881	1.42272	1.44792	1.37711	1.41592	1.41881	1.42988	1.477	1.4419	0.981982
20941	SeMNPV_Til_20941	1.77752	1.51255	1.8654	1.71849	1.68638	1.54031	1.5661	1.5976	1.07567
21001	SeMNPV_Til_21001	1.54047	1.57937	1.50571	1.54185	1.52898	1.50771	1.58578	1.54082	1.00067
21061	SeMNPV_Til_21061	1.8209	1.88723	1.71368	1.80727	1.62535	1.85421	1.7682	1.74926	1.03317
21121	SeMNPV_Til_21121	1.43728	1.39483	1.41589	1.416	1.47728	1.36835	1.38753	1.41105	1.00351
21181	SeMNPV_Til_21181	1.41134	2.37194	1.52901	1.77076	1.4054	1.43085	3.05609	1.96411	0.90156
21241	SeMNPV_Til_21241	1.44326	4.41345	1.42262	2.42644	2.79185	1.389	2.49861	2.22649	1.0898
21301	SeMNPV_Til_21301	1.79785	1.66001	1.85748	1.77178	1.63409	2.20875	1.55337	1.79874	0.985012
21361	SeMNPV_Til_21361	4.40163	3.5007	4.42448	4.10894	3.9991	4.92443	4.3761	4.43321	0.926854
21421	SeMNPV_Til_21421	1.36214	1.40311	1.43772	1.40099	1.37729	1.45339	1.41464	1.41511	0.990023
21481	SeMNPV_Til_21481	3.46771	2.83148	2.86424	3.05448	3.25512	2.8753	1.68517	2.6052	1.17246
21541	SeMNPV_Til_21541	1.43409	1.47338	1.46496	1.45748	1.43625	1.51311	1.54287	1.49741	0.973335
21601	SeMNPV_Til_21601	2.53791	1.46997	1.41929	1.80906	1.76829	3.04298	2.90739	2.57288	0.703125
21661	SeMNPV_Til_21661	1.32919	1.37307	1.46698	1.38975	1.32701	1.46884	1.35593	1.38393	1.0042
21721	SeMNPV_Til_21721	1.41385	1.44112	1.36308	1.40602	1.40962	1.4221	1.47155	1.43442	0.980198
21781	SeMNPV_Til_21781	2.33067	1.52406	2.56771	2.14081	3.08976	3.1269	2.32174	2.84613	0.752184
21841	SeMNPV_Til_21841	1.34091	1.30845	3.47182	2.04039	1.99238	1.49472	2.68858	2.05856	0.991175
21901	SeMNPV_Til_21901	1.62007	1.63686	1.55962	1.60552	1.58424	1.62858	1.67904	1.63062	0.984608
21961	SeMNPV_Til_21961	1.51539	1.50592	1.46687	1.49606	1.49486	1.50697	1.53145	1.5111	0.990049
22021	SeMNPV_Til_22021	3.04916	1.43606	2.60038	2.36186	1.73525	2.3419	2.9514	2.34285	1.00812
22081	SeMNPV_Til_22081	1.63738	1.63598	1.64062	1.63799	1.57813	1.63242	1.53696	1.5825	1.03507
22141	SeMNPV_Til_22141	2.71063	3.27845	4.19435	3.39448	2.68612	3.48457	3.39812	3.1896	1.06423
22201	SeMNPV_Til_22201	2.78034	1.38518	1.54294	1.90282	2.77905	1.35337	4.56077	2.89773	0.656658
22261	SeMNPV_Til_22261	1.97575	2.1256	1.35936	1.82024	1.91603	4.5261	1.50192	2.64802	0.687396
22321	SeMNPV_Til_22321	4.31079	4.215	3.16503	3.89694	4.23586	3.26026	3.98583	3.82732	1.01819
22381	SeMNPV_Til_22381	1.59612	1.66732	1.57813	1.61386	1.50892	2.78844	1.48939	1.92892	0.836664
22441	SeMNPV_Til_22441	1.42795	1.40277	1.54603	1.45892	1.35649	1.53375	1.38913	1.42645	1.02276
22501	SeMNPV_Til_22501	1.433	1.47765	1.56159	1.49075	2.3259	3.89655	3.0472	3.08988	0.482461
22561	SeMNPV_Til_22561	1.53248	1.55791	1.56895	1.55311	1.44537	2.2958	1.50845	1.74987	0.887557
22621	SeMNPV_Til_22621	1.52724	1.55551	1.55565	1.54613	1.44831	1.63304	1.51649	1.53261	1.00882
22681	SeMNPV_Til_22681	1.35913	1.36764	1.55847	1.42841	1.32113	1.52266	1.96008	1.60129	0.892038
22741	SeMNPV_Til_22741	1.45622	1.37095	1.43866	1.42194	2.89751	1.28571	2.49676	2.22666	0.638599
22801	SeMNPV_Til_22801	2.19131	2.70108	1.36955	2.08731	1.40789	1.41879	4.26572	2.36413	0.882908
22861	SeMNPV_Til_22861	1.52211	1.52257	1.51797	1.52089	1.53024	1.51682	1.49398	1.51368	1.00476
22921	SeMNPV_Til_22921	1.78754	1.55142	1.49895	1.61263	1.51333	1.54984	1.88498	1.64938	0.97772
22981	SeMNPV_Til_22981	1.4012	2.37427	1.3605	1.71199	1.38913	1.42016	2.71291	1.84073	0.93006
23041	SeMNPV_Til_23041	1.46424	1.44515	1.41864	1.44268	1.48869	2.65112	1.42422	1.85468	0.77786
23101	SeMNPV_Til_23101	1.50582	1.5148	1.48724	1.50262	1.49424	1.41021	1.40652	1.43699	1.04567
23161	SeMNPV_Til_23161	1.54917	1.6057	1.55153	1.5688	1.46198	1.64462	1.71252	1.60637	0.976608
23221	SeMNPV_Til_23221	2.31691	1.43353	1.89368	1.88137	1.36737	1.40297	1.8671	1.54581	1.21708
23281	SeMNPV_Til_23281	1.76384	1.72477	1.80856	1.76572	1.59286	1.77646	1.51805	1.62912	1.08385
23341	SeMNPV_Til_23341	1.49525	1.51352	1.48137	1.49671	1.48764	1.50325	1.46943	1.48677	1.00669
23401	SeMNPV_Til_23401	8.3789	8.25689	8.60746	8.41442	8.0729	8.88907	8.16035	8.37411	1.00481
23461	SeMNPV_Til_23461	1.4144	1.46266	1.3775	1.41819	1.39592	1.4312	3.47874	2.10195	0.674702
23521	SeMNPV_Til_23521	1.42019	1.41241	1.38747	1.40669	1.44762	1.39117	1.41195	1.41692	0.992783
23581	SeMNPV_Til_23581	1.78848	1.63691	1.63008	1.68516	1.62958	1.64062	1.69172	1.65397	1.01886
23641	SeMNPV_Til_23641	1.63142	1.61091	1.63725	1.62653	1.58819	1.60676	1.54481	1.57992	1.0295
23701	SeMNPV_Til_23701	1.47417	1.42551	1.46281	1.45416	2.10226	2.08174	2.26903	2.15101	0.676037
23761	SeMNPV_Til_23761	1.4129	1.39304	1.54027	1.44874	1.34943	1.51986	2.80133	1.89021	0.766442
23821	SeMNPV_Til_23821	4.24868	3.92101	3.55851	3.9094	3.91025	4.10107	3.91749	3.97627	0.983182
23881	SeMNPV_Til_23881	2.81221	1.4493	1.36722	1.87624	1.39718	3.1687	1.61798	2.06129	0.910229
23941	SeMNPV_Til_23941	1.44769	1.45871	1.40392	1.43677	1.43492	1.44769	2.02614	1.63625	0.878089
24001	SeMNPV_Til_24001	1.81399	2.27464	1.3917	1.82678	3.77646	1.40968	1.90318	2.3631	0.77304
24061	SeMNPV_Til_24061	2.85305	3.81644	2.53007	3.06652	1.39387	1.39795	1.80166	1.53116	2.00274
24121	SeMNPV_Til_24121	1.44163	1.46405	1.4012	1.43563	1.43636	1.44842	1.51893	1.4679	0.97801
24181	SeMNPV_Til_24181	1.59179	1.6249	1.66056	1.62575	2.25772	1.93057	1.47069	1.88633	0.861858
24241	SeMNPV_Til_24241	1.48786	1.3816	1.49787	1.45578	1.53798	1.39515	1.37808	1.43707	1.01302
24301	SeMNPV_Til_24301	1.59119	1.66491	1.57218	1.60943	1.50093	1.6594	1.48891	1.54974	1.03851
24361	SeMNPV_Til_24361	1.44762	1.41056	1.41069	1.42296	1.47999	1.37578	1.39942	1.4184	1.00322
24421	SeMNPV_Til_24421	1.49224	1.4954	1.4482	1.47861	1.47668	1.49458	1.56018	1.51048	0.978904
24481	SeMNPV_Til_24481	1.83251	1.43873	1.93403	1.73509	1.70448	1.48676	1.53693	1.57606	1.10091
24541	SeMNPV_Til_24541	1.3182	1.32296	1.58354	1.40823	1.28898	1.53848	1.30573	1.37773	1.02214
24601	SeMNPV_Til_24601	1.71445	1.66636	1.60983	1.66355	1.61845	1.65796	1.69712	1.65784	1.00344
24661	SeMNPV_Til_24661	1.80239	1.46043	1.42661	1.56314	1.43456	1.47539	1.55361	1.48785	1.0506
24721	SeMNPV_Til_24721	3.59135	3.6418	4.09508	3.77608	3.56954	4.65352	4.2651	4.16272	0.907118
24781	SeMNPV_Til_24781	1.34587	1.37249	1.48106	1.39981	1.34001	1.45425	1.36615	1.38681	1.00938
24841	SeMNPV_Til_24841	1.40621	1.44775	1.37732	1.41043	1.41757	1.42947	1.53318	1.46007	0.965996
24901	SeMNPV_Til_24901	1.5618	1.60991	1.54771	1.57314	1.52263	1.57958	1.49908	1.53376	1.02567
24961	SeMNPV_Til_24961	1.68031	1.38655	1.78365	1.61684	1.67147	1.43446	1.41635	1.50742	1.07258
25021	SeMNPV_Til_25021	1.52603	1.52256	1.48344	1.51068	1.54208	1.47595	1.51358	1.51054	1.00009
25081	SeMNPV_Til_25081	1.49041	1.47626	1.44367	1.47011	1.51111	1.43539	1.86929	1.60527	0.915806
25141	SeMNPV_Til_25141	1.46187	1.40498	1.42662	1.43116	1.49522	1.35988	1.38052	1.41187	1.01366
25201	SeMNPV_Til_25201	5.00921	5.19671	4.84078	5.01557	4.73932	5.71197	4.98147	5.14425	0.974985
25261	SeMNPV_Til_25261	1.40952	1.43153	1.56354	1.4682	1.42305	1.41374	1.42297	1.41992	1.034
25321	SeMNPV_Til_25321	1.43227	1.47861	1.39561	1.43549	1.46212	1.67956	1.4086	1.51676	0.946421
25381	SeMNPV_Til_25381	1.36292	2.43901	1.37369	1.72521	1.36395	2.27392	1.71035	1.78274	0.967728
25441	SeMNPV_Til_25441	1.49657	1.49347	1.44803	1.47935	1.48207	1.4892	1.51049	1.49392	0.990252
25501	SeMNPV_Til_25501	2.93951	1.56668	1.50332	2.00317	2.72908	2.61902	1.96932	2.43914	0.821261
25561	SeMNPV_Til_25561	1.36835	1.42166	3.41593	2.06864	1.37046	1.38783	2.23138	1.66323	1.24375
25621	SeMNPV_Til_25621	1.41179	1.42549	1.43688	1.42472	1.40882	1.45923	1.46033	1.44279	0.987474
25681	SeMNPV_Til_25681	1.35432	1.36136	1.58728	1.43432	1.30461	1.56262	2.28101	1.71608	0.835812
25741	SeMNPV_Til_25741	2.77339	2.74722	3.68735	3.06932	1.38843	2.12702	2.64966	2.05504	1.49356
25801	SeMNPV_Til_25801	1.43072	1.60264	1.4274	1.48692	1.42212	2.66721	2.41272	2.16735	0.686054
25861	SeMNPV_Til_25861	1.59718	1.95364	1.62917	1.72666	2.99639	1.47272	1.43086	1.96666	0.877969
25921	SeMNPV_Til_25921	1.3596	1.40189	1.44271	1.4014	1.36511	1.46381	2.13311	1.65401	0.847274
25981	SeMNPV_Til_25981	1.66708	1.53772	1.56969	1.5915	1.5666	1.59582	1.61182	1.59141	1.00005
26041	SeMNPV_Til_26041	1.38763	2.43281	1.33191	1.71745	1.39344	1.41189	1.47673	1.42735	1.20324
26101	SeMNPV_Til_26101	3.52682	3.68697	3.8485	3.68743	3.64856	3.40863	4.55872	3.87197	0.952341
26161	SeMNPV_Til_26161	1.35996	1.39633	1.44678	1.40103	1.36242	1.45189	1.40246	1.40559	0.996752
26221	SeMNPV_Til_26221	1.45837	1.41313	1.41848	1.42999	1.49058	1.3756	1.39648	1.42089	1.00641
26281	SeMNPV_Til_26281	1.78119	1.81461	1.86067	1.81882	1.51996	2.06516	1.42516	1.67009	1.08906
26341	SeMNPV_Til_26341	1.85421	1.86815	1.70471	1.80903	1.6414	1.81031	1.77828	1.74333	1.03768
26401	SeMNPV_Til_26401	1.52648	1.56195	1.50364	1.53069	1.53527	1.55005	1.64308	1.57613	0.971165
26461	SeMNPV_Til_26461	3.74178	4.75009	6.28883	4.9269	3.87206	3.73277	3.89909	3.83464	1.28484
26521	SeMNPV_Til_26521	1.47562	1.39659	1.45222	1.44148	1.49389	1.31797	1.33047	1.38078	1.04396
26581	SeMNPV_Til_26581	1.38633	1.42262	4.50868	2.43921	1.89218	1.39782	1.4171	1.56903	1.5546
26641	SeMNPV_Til_26641	1.41374	2.47249	4.34117	2.74247	1.41472	1.44606	1.49768	1.45282	1.88768
26701	SeMNPV_Til_26701	1.68329	2.79966	1.58115	2.02137	1.59264	1.61573	1.65006	1.61948	1.24816
26761	SeMNPV_Til_26761	1.4974	1.49412	1.448	1.47984	1.50385	1.47108	1.50328	1.49274	0.99136
26821	SeMNPV_Til_26821	1.3886	1.42272	1.42054	1.41062	1.40662	1.45319	1.47888	1.44623	0.975379
26881	SeMNPV_Til_26881	1.35885	1.36675	1.56366	1.42975	2.13811	1.52849	1.35089	1.6725	0.85486
26941	SeMNPV_Til_26941	3.43779	2.43388	2.63495	2.83554	2.62723	1.65657	2.06938	2.11772	1.33896
27001	SeMNPV_Til_27001	4.25593	4.3756	4.26365	4.29839	4.53404	4.55143	4.21777	4.43441	0.969325
27061	SeMNPV_Til_27061	2.84536	1.49806	2.65793	2.33378	2.22362	3.21871	3.18947	2.87727	0.81111
27121	SeMNPV_Til_27121	1.44752	1.38421	1.42108	1.4176	4.51691	1.33737	1.36275	2.40568	0.589272
27181	SeMNPV_Til_27181	1.60008	1.67292	1.58371	1.6189	1.51099	1.66652	1.48951	1.55567	1.04064
27241	SeMNPV_Til_27241	1.46671	1.48642	1.53502	1.49605	2.91834	2.55002	2.74822	2.73886	0.546232
27301	SeMNPV_Til_27301	1.68082	1.75037	1.67923	1.70348	2.32384	1.80977	1.47981	1.87114	0.910397
27361	SeMNPV_Til_27361	1.82192	1.62702	1.87513	1.77469	1.6577	1.64785	1.56849	1.62468	1.09233
27421	SeMNPV_Til_27421	1.57417	1.64013	1.56014	1.59148	1.55863	1.65988	1.67327	1.63059	0.976013
27481	SeMNPV_Til_27481	1.36691	1.40656	1.43446	1.40264	1.43038	1.45554	1.42838	1.4381	0.975344
27541	SeMNPV_Til_27541	1.47403	1.44971	1.62374	1.51583	1.34256	1.71046	1.39896	1.48399	1.02145
27601	SeMNPV_Til_27601	2.80446	2.28472	2.05225	2.38048	1.64576	1.74893	2.83366	2.07612	1.1466
27661	SeMNPV_Til_27661	1.52563	1.58785	1.51352	1.54233	1.48021	1.54924	1.47479	1.50141	1.02725
27721	SeMNPV_Til_27721	2.29717	1.55533	1.52302	1.79184	1.91874	1.5968	2.56014	2.02523	0.884761
27781	SeMNPV_Til_27781	1.73197	1.64331	1.61292	1.66273	1.61954	1.64472	1.68763	1.65063	1.00733
27841	SeMNPV_Til_27841	1.41129	3.5918	1.36816	2.12375	1.38603	2.82536	2.47853	2.22997	0.952364
27901	SeMNPV_Til_27901	1.4106	1.43083	1.3877	1.40971	1.42514	2.4315	1.42287	1.75984	0.801046
27961	SeMNPV_Til_27961	1.36041	1.40456	1.44971	1.40489	1.36253	1.47635	1.40779	1.41556	0.992466
28021	SeMNPV_Til_28021	2.35308	1.42208	1.35873	1.7113	1.41984	1.40129	1.41881	1.41332	1.21084
28081	SeMNPV_Til_28081	3.67418	1.36754	1.46448	2.16874	1.33036	1.44726	1.35759	1.3784	1.57337
28141	SeMNPV_Til_28141	1.50244	1.54615	1.48637	1.51165	1.48242	1.4391	2.39229	1.77127	0.85343
28201	SeMNPV_Til_28201	1.73329	1.80882	1.7649	1.769	1.53394	1.9711	1.4519	1.65232	1.07062
28261	SeMNPV_Til_28261	1.4636	1.38386	1.44003	1.42916	1.48732	1.3137	1.33043	1.37715	1.03777
28321	SeMNPV_Til_28321	2.62098	1.497	2.49252	2.2035	2.43198	1.4547	2.54786	2.14485	1.02735
28381	SeMNPV_Til_28381	1.45246	2.00463	1.53411	1.66373	1.89782	1.37663	1.4042	1.55955	1.0668
28441	SeMNPV_Til_28441	1.63612	1.5329	1.55537	1.5748	1.55584	1.58898	1.59453	1.57978	0.996844
28501	SeMNPV_Til_28501	1.3623	1.4086	1.48938	1.42009	1.77752	1.51862	1.38742	1.56119	0.909625
28561	SeMNPV_Til_28561	2.8114	2.2825	1.31094	2.13494	1.36933	1.40752	1.79024	1.52236	1.40239
28621	SeMNPV_Til_28621	1.503	1.57594	1.63426	1.57107	1.62321	3.23728	2.10373	2.32141	0.676774
28681	SeMNPV_Til_28681	3.14259	2.41255	2.23167	2.5956	1.42572	1.39161	1.41942	1.41225	1.83792
28741	SeMNPV_Til_28741	1.53999	1.5558	1.49796	1.53125	1.54324	1.50261	1.56109	1.53565	0.997135
28801	SeMNPV_Til_28801	1.52861	1.60241	1.51409	1.54837	1.46194	1.56802	1.48981	1.50659	1.02773
28861	SeMNPV_Til_28861	1.37744	1.41694	2.95528	1.91655	1.38848	1.38557	2.29133	1.68846	1.13509
28921	SeMNPV_Til_28921	1.59033	1.6243	1.6568	1.62381	1.43947	1.91719	1.47369	1.61012	1.0085
28981	SeMNPV_Til_28981	1.36008	1.39242	1.45529	1.4026	1.36002	1.45457	1.39561	1.4034	0.999427
29041	SeMNPV_Til_29041	1.677	1.74236	1.71922	1.71286	1.48045	2.02614	1.4554	1.654	1.03559
29101	SeMNPV_Til_29101	1.42132	1.43565	1.37058	1.40918	1.42026	1.41988	1.43785	1.426	0.988209
29161	SeMNPV_Til_29161	1.5216	1.50936	1.47423	1.50173	1.49788	1.51342	1.53545	1.51558	0.99086
29221	SeMNPV_Til_29221	1.48996	1.48754	1.44176	1.47309	1.47349	1.48341	1.49975	1.48555	0.991613
29281	SeMNPV_Til_29281	2.48444	1.80116	1.65826	1.98129	1.62892	1.76352	1.74647	1.71297	1.15664
29341	SeMNPV_Til_29341	2.05021	1.31261	1.47189	1.61157	2.85053	1.29329	1.39233	1.84538	0.873298
29401	SeMNPV_Til_29401	1.41444	2.84594	1.43422	1.8982	1.42476	1.47888	1.52733	1.47699	1.28518
29461	SeMNPV_Til_29461	1.37097	1.42201	1.26238	1.35179	1.37235	1.50483	1.43439	1.43719	0.940575
29521	SeMNPV_Til_29521	1.34866	1.36737	2.40701	1.70768	1.33417	1.468	1.35847	1.38688	1.23131
29581	SeMNPV_Til_29581	1.6287	1.37569	1.69707	1.56715	1.63787	2.16975	1.39507	1.73423	0.903656
29641	SeMNPV_Til_29641	1.69375	1.77025	1.73235	1.73212	1.51651	2.3696	1.45165	1.77925	0.973508
29701	SeMNPV_Til_29701	1.4457	1.39078	1.42828	1.42159	1.82555	1.37189	1.38426	1.52723	0.930824
29761	SeMNPV_Til_29761	1.43636	1.43667	1.39325	1.42209	1.4521	2.59297	1.43581	1.82696	0.778392
29821	SeMNPV_Til_29821	1.45223	1.3683	1.43509	1.41854	1.47259	1.28813	1.30606	1.35559	1.04644
29881	SeMNPV_Til_29881	1.53578	1.53574	1.48964	1.52039	1.52299	1.51845	1.56287	1.53477	0.990629
29941	SeMNPV_Til_29941	1.70539	1.76922	1.76633	1.74698	1.48628	2.06141	1.44038	1.66269	1.0507
30001	SeMNPV_Til_30001	1.43029	1.4481	1.38547	1.42129	1.42236	1.43335	1.45756	1.43776	0.988543
30061	SeMNPV_Til_30061	1.71974	1.77275	1.80005	1.76418	1.48513	2.08123	1.43239	1.66625	1.05877
30121	SeMNPV_Til_30121	1.48552	1.52449	1.49381	1.50128	1.48546	1.54623	1.62171	1.55114	0.967855
30181	SeMNPV_Til_30181	1.51432	1.55165	1.49561	1.52053	1.51975	1.54408	1.63866	1.56749	0.970036
30241	SeMNPV_Til_30241	1.55377	1.62681	1.53603	1.5722	1.48287	1.6034	1.48368	1.52332	1.03209
30301	SeMNPV_Til_30301	1.41056	1.44864	1.40495	1.42138	1.42435	1.44696	1.54181	1.47104	0.966244
30361	SeMNPV_Til_30361	6.17412	5.49631	5.70001	5.79015	5.86445	5.96434	6.03809	5.95563	0.972214
30421	SeMNPV_Til_30421	1.50573	1.54589	1.50559	1.51907	1.4496	1.54878	1.52913	1.50917	1.00656
30481	SeMNPV_Til_30481	1.54467	1.61841	1.52936	1.56415	1.4662	1.60597	1.50587	1.52601	1.02499
30541	SeMNPV_Til_30541	1.54608	1.61681	1.52983	1.56424	1.48355	1.58455	1.48077	1.51629	1.03163
30601	SeMNPV_Til_30601	1.48285	1.51537	1.46691	1.48838	1.48891	1.51911	1.62286	1.54363	0.964209
30661	SeMNPV_Til_30661	2.70078	1.47912	1.4072	1.86237	1.41988	2.11149	3.26979	2.26705	0.821492
30721	SeMNPV_Til_30721	1.44527	1.36571	1.4371	1.41603	1.55506	2.60483	2.38362	2.18117	0.649206
30781	SeMNPV_Til_30781	1.45732	1.43092	1.55757	1.48194	1.37369	1.56699	1.40601	1.44889	1.0228
30841	SeMNPV_Til_30841	1.66165	1.59097	1.56935	1.60732	1.58431	1.60711	1.64258	1.61133	0.997511
30901	SeMNPV_Til_30901	1.75767	1.81898	1.82119	1.79928	1.52932	2.02825	1.44139	1.66632	1.07979
30961	SeMNPV_Til_30961	1.59499	1.67363	1.58106	1.61656	1.48659	1.6975	1.50125	1.56178	1.03508
31021	SeMNPV_Til_31021	1.76187	1.90366	1.73989	1.8018	1.58736	1.94578	1.74045	1.75786	1.025
31081	SeMNPV_Til_31081	1.9534	1.6719	1.9711	1.86547	1.64849	1.73101	1.5304	1.63663	1.13982
31141	SeMNPV_Til_31141	2.57449	3.44323	2.56482	2.86084	1.58184	4.60039	4.05742	3.41322	0.838166
31201	SeMNPV_Til_31201	1.47028	1.40868	1.43517	1.43805	1.50154	1.3603	1.3787	1.41351	1.01736
31261	SeMNPV_Til_31261	1.52027	1.5016	1.5181	1.51332	1.54509	1.50499	1.48593	1.512	1.00087
31321	SeMNPV_Til_31321	1.65293	1.68524	1.59248	1.64355	1.59858	1.67754	1.70231	1.65948	0.990402
31381	SeMNPV_Til_31381	1.40589	1.45679	1.36341	1.4087	1.38763	1.42371	1.46122	1.42418	0.989125
31441	SeMNPV_Til_31441	1.32132	1.32358	2.8719	1.83893	1.29542	1.51133	1.30249	1.36975	1.34254
31501	SeMNPV_Til_31501	3.09769	3.77915	3.25589	3.37758	4.4771	4.20938	3.69542	4.1273	0.81835
31561	SeMNPV_Til_31561	1.34195	1.3733	1.47141	1.39555	1.34039	2.11002	1.36722	1.60588	0.869028
31621	SeMNPV_Til_31621	1.53326	1.5173	1.52959	1.52672	1.55086	1.51727	5.40059	2.82291	0.540832
31681	SeMNPV_Til_31681	1.67011	2.6011	1.66732	1.97951	1.5597	1.72828	2.58406	1.95735	1.01132
31741	SeMNPV_Til_31741	1.38987	1.42858	1.52678	1.44841	1.33638	1.58275	1.37578	1.43164	1.01171
31801	SeMNPV_Til_31801	1.56933	1.56003	3.21381	2.11439	1.50831	3.04089	1.60799	2.0524	1.0302
31861	SeMNPV_Til_31861	2.02507	1.73197	1.69745	1.81816	1.6766	1.66161	1.78654	1.70825	1.06434
31921	SeMNPV_Til_31921	2.64569	1.47654	2.29496	2.13906	1.44769	1.47119	1.58491	1.50126	1.42484
31981	SeMNPV_Til_31981	1.50175	1.46381	1.46629	1.47728	1.52632	1.38282	1.38982	1.43299	1.03091
32041	SeMNPV_Til_32041	1.31499	1.31637	1.56294	1.3981	1.29304	1.50344	1.29276	1.36308	1.02569
32101	SeMNPV_Til_32101	1.99085	1.38823	2.06845	1.81584	1.74344	1.41095	1.52442	1.5596	1.1643
32161	SeMNPV_Til_32161	2.18545	1.70429	1.6622	1.85065	1.65467	1.67523	1.74142	1.69044	1.09477
32221	SeMNPV_Til_32221	1.48486	1.51156	1.45756	1.48466	1.48945	1.50979	1.61975	1.53966	0.964275
32281	SeMNPV_Til_32281	1.51768	1.51079	1.47086	1.49978	1.53371	1.47309	1.50802	1.50494	0.996571
32341	SeMNPV_Til_32341	1.38217	1.43735	1.32813	1.38255	1.38402	1.40986	2.04794	1.61394	0.856629
32401	SeMNPV_Til_32401	1.56283	1.63638	1.54355	1.58092	1.48176	1.62337	1.49018	1.53177	1.03209
32461	SeMNPV_Til_32461	1.4335	1.47797	1.40688	1.43945	1.42078	1.4525	1.43716	1.43681	1.00184
32521	SeMNPV_Til_32521	1.61528	1.64869	1.68689	1.65029	1.43996	2.00414	1.45957	1.63456	1.00962
32581	SeMNPV_Til_32581	9.3205	10.5319	11.684	10.5121	11.1955	11.4976	11.1764	11.2898	0.931119
32641	SeMNPV_Til_32641	1.44086	1.47203	1.43735	1.45008	1.4263	1.47536	1.5118	1.47115	0.985677
32701	SeMNPV_Til_32701	1.78023	1.58508	1.85265	1.73932	1.66776	1.6022	1.57748	1.61581	1.07644
32761	SeMNPV_Til_32761	1.40941	1.44417	1.41938	1.42432	1.42301	1.4632	1.53077	1.47233	0.967394
32821	SeMNPV_Til_32821	1.4676	1.49321	1.43471	1.46517	1.46741	1.48722	1.59631	1.51698	0.965848
32881	SeMNPV_Til_32881	1.4863	1.41986	1.45334	1.45317	1.51089	1.35793	1.36967	1.41283	1.02855
32941	SeMNPV_Til_32941	1.30053	2.42468	1.58145	1.76889	1.52525	1.52809	1.91646	1.6566	1.06778
33001	SeMNPV_Til_33001	4.11431	3.57561	3.71898	3.80297	3.79327	4.35393	3.83173	3.99298	0.952414
33061	SeMNPV_Til_33061	2.78717	1.42168	1.53737	1.9154	2.83491	2.9819	2.47336	2.76339	0.693136
33121	SeMNPV_Til_33121	3.52114	4.24823	3.54409	3.77115	4.3732	4.77669	4.83996	4.66328	0.808691
33181	SeMNPV_Til_33181	2.78224	1.41465	1.42532	1.87407	1.40042	3.27082	3.01388	2.56171	0.731572
33241	SeMNPV_Til_33241	1.46879	1.50744	1.44673	1.47432	1.43362	1.49695	1.51293	1.48116	0.995379
33301	SeMNPV_Til_33301	1.58212	1.63496	1.55223	1.58977	1.56606	1.63811	1.67645	1.62688	0.977192
33361	SeMNPV_Til_33361	3.04271	2.17354	1.68864	2.30163	2.08499	2.44903	1.41175	1.98192	1.16131
33421	SeMNPV_Til_33421	2.95984	1.69571	3.21267	2.62274	2.07556	2.11654	1.41111	1.86774	1.40423
33481	SeMNPV_Til_33481	1.42768	1.4516	1.43656	1.43862	1.42043	1.46658	1.49206	1.45969	0.985563
33541	SeMNPV_Til_33541	1.54084	1.56528	1.5022	1.5361	1.54074	1.50017	1.56246	1.53446	1.00107
33601	SeMNPV_Til_33601	1.62928	1.68497	1.66642	1.66022	1.4651	3.81373	1.47996	2.25293	0.736918
33661	SeMNPV_Til_33661	1.41902	1.45671	3.49253	2.12276	1.42727	1.43809	1.54387	1.46975	1.4443
33721	SeMNPV_Til_33721	1.90888	1.73815	1.677	1.77468	1.66286	1.68818	1.76024	1.70376	1.04162
33781	SeMNPV_Til_33781	1.40103	1.97969	2.5756	1.98544	1.88887	1.42172	3.67395	2.32818	0.852787
33841	SeMNPV_Til_33841	2.44809	2.68649	2.03935	2.39131	1.71765	2.80399	1.57633	2.03266	1.17645
33901	SeMNPV_Til_33901	1.58686	1.33885	1.65346	1.52639	1.64013	1.36737	2.54621	1.85124	0.824525
33961	SeMNPV_Til_33961	1.31739	1.34529	1.47711	1.37993	2.25536	1.43879	1.32542	1.67319	0.82473
34021	SeMNPV_Til_34021	1.3301	1.3689	1.46354	1.38751	1.33062	1.44948	1.35866	1.37959	1.00575
34081	SeMNPV_Til_34081	1.41352	1.41529	1.36825	1.39902	1.43622	1.38965	1.4159	1.41393	0.98946
34141	SeMNPV_Til_34141	1.37297	1.40019	1.45009	1.40775	1.375	1.45616	1.40834	1.41316	0.996169
34201	SeMNPV_Til_34201	1.49201	3.17623	2.65112	2.43978	1.78242	1.44459	1.4617	1.5629	1.56106
34261	SeMNPV_Til_34261	1.49072	1.46445	1.44681	1.46733	1.51716	1.41643	1.41338	1.44899	1.01266
34321	SeMNPV_Til_34321	1.50936	1.58455	1.60116	1.56502	1.43235	1.78605	1.52752	1.58197	0.989285
34381	SeMNPV_Til_34381	1.87071	1.39609	1.98007	1.74896	1.72049	1.43268	1.50269	1.55195	1.12694
34441	SeMNPV_Til_34441	1.29857	2.49316	1.51178	1.76784	2.6339	1.43231	1.27316	1.77979	0.993283
34501	SeMNPV_Til_34501	1.61809	1.43954	2.35758	1.80507	1.49573	3.06075	2.59931	2.38526	0.756759
34561	SeMNPV_Til_34561	1.41276	1.45142	1.37644	1.41354	1.40902	1.42443	1.42704	1.42016	0.995339
34621	SeMNPV_Til_34621	1.52829	1.52706	1.48142	1.51225	1.5216	1.50924	1.55387	1.52824	0.989543
34681	SeMNPV_Til_34681	2.56847	3.05823	2.37454	2.66708	2.03388	3.15259	3.34505	2.84384	0.937845
34741	SeMNPV_Til_34741	1.44642	1.47315	1.44723	1.4556	1.42841	1.48291	1.50833	1.47322	0.988043
34801	SeMNPV_Til_34801	1.48947	1.52047	1.47047	1.49347	1.46703	3.29704	2.57105	2.44504	0.610817
34861	SeMNPV_Til_34861	1.57657	1.47023	1.58578	1.5442	1.5955	1.49928	1.47353	1.52277	1.01407
34921	SeMNPV_Til_34921	1.54513	1.55144	1.49873	1.53176	1.53284	1.5229	1.58202	1.54592	0.990843
34981	SeMNPV_Til_34981	1.42306	1.40624	1.51557	1.44829	1.37565	1.50496	1.3999	1.42684	1.01504
35041	SeMNPV_Til_35041	1.4496	1.37421	1.44028	1.42137	5.09902	1.35327	1.36292	2.60507	0.545615
35101	SeMNPV_Til_35101	1.46738	1.50914	2.22077	1.73243	1.43805	2.33464	1.45049	1.74106	0.995043
35161	SeMNPV_Til_35161	1.49589	2.08615	1.47582	1.68595	1.50263	2.80085	3.31364	2.53904	0.664012
35221	SeMNPV_Til_35221	7.61637	7.17607	7.55992	7.45079	7.15433	7.82798	7.10767	7.36333	1.01188
35281	SeMNPV_Til_35281	1.57758	1.60539	1.65694	1.6133	1.43005	1.91313	1.46548	1.60288	1.0065
35341	SeMNPV_Til_35341	1.56917	1.52974	1.51738	1.53876	1.51842	1.55672	1.5605	1.54521	0.995826
35401	SeMNPV_Til_35401	1.57657	1.54496	1.52191	1.54781	1.54897	1.55261	1.6096	1.57039	0.985623
35461	SeMNPV_Til_35461	1.72533	1.61987	1.60563	1.65028	1.61251	1.62998	1.67308	1.63852	1.00717
35521	SeMNPV_Til_35521	5.64195	5.71247	5.60623	5.65355	5.51953	5.84799	5.26305	5.54352	1.01985
35581	SeMNPV_Til_35581	1.78036	1.70981	1.64376	1.71131	1.6384	1.68646	1.73015	1.685	1.01561
35641	SeMNPV_Til_35641	1.37226	1.42493	1.29905	1.36541	1.37908	1.39478	3.66325	2.1457	0.636348
35701	SeMNPV_Til_35701	1.3946	1.39585	1.49736	1.42927	1.36184	3.10869	1.39195	1.95416	0.731399
35761	SeMNPV_Til_35761	1.43696	1.48573	2.46745	1.79672	1.41279	1.46175	1.47601	1.45018	1.23896
35821	SeMNPV_Til_35821	1.87759	1.43431	1.96138	1.75776	1.71511	1.48188	1.54208	1.57969	1.11272
35881	SeMNPV_Til_35881	1.62508	1.41881	1.42042	1.48811	1.40433	1.44921	1.47163	1.44172	1.03217
35941	SeMNPV_Til_35941	1.4668	1.50761	1.41894	1.46445	2.19594	1.46295	2.93847	2.19912	0.665924
36001	SeMNPV_Til_36001	1.39275	2.61318	1.34799	1.78464	1.38703	2.54125	1.42356	1.78395	1.00039
36061	SeMNPV_Til_36061	1.53029	2.47414	2.78224	2.26222	3.03132	2.90259	2.56361	2.8325	0.798666
36121	SeMNPV_Til_36121	1.50512	1.49254	1.62068	1.53945	1.37518	1.72854	1.42448	1.5094	1.01991
36181	SeMNPV_Til_36181	1.61435	1.61258	1.54921	1.59204	2.62098	1.60353	1.70892	1.97781	0.804953
36241	SeMNPV_Til_36241	7.7515	7.82114	7.74497	7.77254	7.51229	7.70507	7.56659	7.59465	1.02342
36301	SeMNPV_Til_36301	1.42456	1.46184	1.39494	1.42711	1.43295	1.44405	1.55039	1.4758	0.967012
36361	SeMNPV_Til_36361	6.99935	6.88296	5.61214	6.49815	6.18003	6.20321	5.72588	6.03637	1.0765
36421	SeMNPV_Til_36421	1.37952	1.42015	2.92941	1.9097	1.33129	1.58358	1.81963	1.57817	1.21007
36481	SeMNPV_Til_36481	1.45901	1.47516	1.43723	1.45713	1.46175	1.46374	3.04787	1.99112	0.731816
36541	SeMNPV_Til_36541	2.79966	1.95444	3.274	2.67603	3.22719	2.40456	2.73346	2.7884	0.959701
36601	SeMNPV_Til_36601	2.6853	1.88254	1.75502	2.10762	2.42592	2.00656	2.61622	2.34956	0.897027
36661	SeMNPV_Til_36661	1.36787	1.42259	1.27596	1.35547	1.37453	1.38774	1.41733	1.3932	0.972921
36721	SeMNPV_Til_36721	2.17092	1.37156	1.42484	1.65577	1.68008	1.32499	1.34667	1.45058	1.14145
36781	SeMNPV_Til_36781	1.46919	1.44688	2.8753	1.93046	1.77309	2.77427	1.44478	1.99738	0.966496
36841	SeMNPV_Til_36841	3.48019	3.59659	3.21755	3.43144	3.76481	1.42324	2.9904	2.72615	1.25871
36901	SeMNPV_Til_36901	2.70108	1.36998	2.76549	2.27885	1.4703	2.80446	2.11617	2.13031	1.06973
36961	SeMNPV_Til_36961	1.44895	1.45627	1.40311	1.43611	1.44794	1.43618	1.45316	1.44576	0.993327
37021	SeMNPV_Til_37021	1.54024	1.55484	1.49693	1.53067	1.54226	1.50549	1.56516	1.53764	0.995467
37081	SeMNPV_Til_37081	7.78088	6.87194	7.5573	7.40337	6.98285	8.4132	7.36883	7.58829	0.97563
37141	SeMNPV_Til_37141	3.38192	3.48573	3.10367	3.32377	3.38408	3.09879	3.39504	3.29263	1.00946
37201	SeMNPV_Til_37201	1.60337	1.67342	1.5879	1.62157	1.51586	2.33247	1.7908	1.87971	0.862667
37261	SeMNPV_Til_37261	1.38666	1.4376	1.34336	1.3892	1.39583	1.41443	1.4947	1.43499	0.968096
37321	SeMNPV_Til_37321	1.54149	1.61729	1.52557	1.56145	1.4691	1.59338	1.49116	1.51788	1.0287
37381	SeMNPV_Til_37381	1.43467	1.47559	1.40931	1.43986	1.42616	1.45119	1.43743	1.43826	1.00111
37441	SeMNPV_Til_37441	1.41273	1.46072	1.37341	1.41562	1.3926	1.42911	1.43118	1.41763	0.998581
37501	SeMNPV_Til_37501	1.62877	1.65543	1.73036	1.67152	2.15031	2.08242	1.43619	1.88964	0.884569
37561	SeMNPV_Til_37561	1.49456	1.49162	1.44588	1.47735	1.7631	1.48671	1.50684	1.58555	0.931763
37621	SeMNPV_Til_37621	1.656	1.72551	1.68466	1.68873	1.47931	1.96325	1.46934	1.6373	1.03141
37681	SeMNPV_Til_37681	2.19025	2.59999	1.42389	2.07137	1.45286	2.65318	1.96638	2.02414	1.02334
37741	SeMNPV_Til_37741	1.42098	1.45823	1.52218	1.46713	1.36072	1.57877	1.40386	1.44778	1.01336
37801	SeMNPV_Til_37801	6.63916	8.07	8.53177	7.74698	7.59252	8.07379	8.44107	8.03579	0.964059
37861	SeMNPV_Til_37861	1.99146	2.70149	2.21453	2.3025	1.95364	3.54885	2.46198	2.65482	0.867287
37921	SeMNPV_Til_37921	1.46875	3.92148	2.93431	2.77485	4.2479	3.28269	1.45129	2.99396	0.926816
37981	SeMNPV_Til_37981	1.96174	1.36368	2.07171	1.79904	1.74434	1.35213	1.92915	1.67521	1.07392
38041	SeMNPV_Til_38041	1.41443	1.42853	2.74045	1.86114	1.4317	2.79268	1.90388	2.04275	0.911091
38101	SeMNPV_Til_38101	3.96775	1.33804	1.60208	2.30262	2.25301	2.53308	2.77443	2.52017	0.913677
38161	SeMNPV_Til_38161	1.66294	2.00349	1.6548	1.77374	1.84183	1.6002	1.62575	1.68926	1.05001
38221	SeMNPV_Til_38221	1.49864	1.5461	1.4622	1.50231	1.49809	1.51083	1.61623	1.54172	0.974441
38281	SeMNPV_Til_38281	1.51925	3.48959	1.47108	2.15997	1.51447	1.49964	1.54239	1.51883	1.42213
38341	SeMNPV_Til_38341	1.43804	3.65886	2.56189	2.55293	2.88614	1.35873	2.76195	2.33561	1.09305
38401	SeMNPV_Til_38401	1.41299	1.41498	1.36809	1.39869	1.88498	1.38938	1.41552	1.5633	0.894704
38461	SeMNPV_Til_38461	1.47542	1.49124	1.4566	1.47442	1.47434	1.48218	1.45795	1.47149	1.00199
38521	SeMNPV_Til_38521	1.65731	1.83209	1.71741	1.7356	2.54621	1.99523	1.67537	2.07227	0.837536
38581	SeMNPV_Til_38581	3.63971	1.49095	1.52131	2.21732	1.55153	1.49876	1.47869	1.50966	1.46876
38641	SeMNPV_Til_38641	2.60912	2.35504	3.43485	2.79967	3.79479	1.36858	1.3822	2.18186	1.28316
38701	SeMNPV_Til_38701	1.49119	1.43177	1.458	1.46032	1.51432	1.36289	1.37441	1.4172	1.03042
38761	SeMNPV_Til_38761	1.75168	1.63067	1.80462	1.72899	1.63619	1.64634	1.5629	1.61514	1.07049
38821	SeMNPV_Til_38821	1.51111	1.48509	1.48011	1.49211	1.52775	1.40303	1.39494	1.44191	1.03481
38881	SeMNPV_Til_38881	1.73046	1.64785	1.76295	1.71375	1.62088	1.66025	1.55468	1.61194	1.06316
38941	SeMNPV_Til_38941	2.10867	2.11378	2.07892	2.10046	1.69042	1.63105	1.53825	1.6199	1.29665
39001	SeMNPV_Til_39001	1.58388	1.6495	1.5661	1.59983	1.50989	1.63431	1.49026	1.54482	1.03561
39061	SeMNPV_Til_39061	1.69653	1.76302	1.70166	1.7204	1.55108	1.83142	1.47637	1.61962	1.06222
39121	SeMNPV_Til_39121	1.46455	1.50353	1.44192	1.47	1.43148	1.4919	1.51103	1.47814	0.994494
39181	SeMNPV_Til_39181	1.42231	1.41799	2.46168	1.76733	1.44446	1.3946	1.41864	1.41923	1.24527
39241	SeMNPV_Til_39241	1.93612	1.91951	2.46339	2.10634	1.70539	1.9852	1.72597	1.80552	1.16661
39301	SeMNPV_Til_39301	1.40834	1.38809	1.63003	1.47549	2.15939	1.71405	1.95135	1.9416	0.759934
39361	SeMNPV_Til_39361	1.50673	1.50501	1.56838	1.52671	1.42586	1.63286	1.46299	1.50724	1.01292
39421	SeMNPV_Til_39421	4.16845	3.68121	3.95813	3.93593	4.1571	4.17118	3.39873	3.909	1.00689
39481	SeMNPV_Til_39481	2.79671	1.51482	1.44885	1.92013	1.44405	1.69172	1.88423	1.67333	1.14749
39541	SeMNPV_Til_39541	1.55392	2.56102	1.39275	1.8359	3.5293	1.37975	1.40754	2.10553	0.871939
39601	SeMNPV_Til_39601	1.43602	1.87196	1.39633	1.5681	1.43233	1.4433	1.50584	1.46049	1.07368
39661	SeMNPV_Til_39661	1.84947	1.83633	1.68658	1.79079	1.6481	1.76756	1.76979	1.72848	1.03605
39721	SeMNPV_Til_39721	1.47023	2.19025	1.64912	1.76986	1.5917	3.37884	1.39248	2.12101	0.834445
39781	SeMNPV_Til_39781	3.40604	1.50206	1.46162	2.12324	2.90358	3.92055	3.50597	3.44337	0.616617
39841	SeMNPV_Til_39841	1.40652	1.43901	1.42633	1.42396	1.41976	1.46853	1.51615	1.46815	0.969899
39901	SeMNPV_Til_39901	2.70006	1.82057	1.83812	2.11958	1.55021	1.99046	1.44525	1.66197	1.27534
39961	SeMNPV_Til_39961	1.50255	1.37864	1.51889	1.46669	1.55178	1.4014	1.37589	1.44302	1.0164
40021	SeMNPV_Til_40021	1.40903	1.44893	3.5116	2.12318	1.41806	1.42899	1.53135	1.45947	1.45476
40081	SeMNPV_Til_40081	1.63477	1.54165	1.55459	1.577	1.55909	1.58733	1.60266	1.58303	0.996195
40141	SeMNPV_Til_40141	3.56784	3.15217	3.77679	3.49894	3.40986	4.18582	2.40424	3.33331	1.04969
40201	SeMNPV_Til_40201	1.63249	1.38482	1.69529	1.57087	1.64154	2.23879	1.4059	1.76208	0.891486
40261	SeMNPV_Til_40261	1.41703	1.45562	1.53686	1.46984	1.53443	1.43687	1.54211	1.50447	0.976983
40321	SeMNPV_Til_40321	1.51083	2.45005	2.92048	2.29379	3.40511	2.14192	2.03782	2.52828	0.907251
40381	SeMNPV_Til_40381	1.48732	1.4858	1.43868	1.4706	1.49199	1.46461	2.18113	1.71257	0.858709
40441	SeMNPV_Til_40441	2.51239	1.48964	1.45681	1.81961	1.4762	1.48101	1.4578	1.47167	1.23643
40501	SeMNPV_Til_40501	1.4667	1.47078	1.42037	1.45261	1.44755	1.46815	1.47959	1.4651	0.991479
40561	SeMNPV_Til_40561	1.41608	1.44789	1.37103	1.41167	1.41682	1.42694	1.50062	1.44813	0.974824
40621	SeMNPV_Til_40621	2.61073	3.60391	1.32499	2.51321	1.38452	1.40903	2.43281	1.74212	1.44261
40681	SeMNPV_Til_40681	1.35321	1.36089	1.56392	1.42601	1.31412	1.52477	1.34271	1.39387	1.02306
40741	SeMNPV_Til_40741	8.1427	8.99	9.6615	8.9314	9.15455	9.34187	9.11308	9.20317	0.97047
40801	SeMNPV_Til_40801	2.4149	1.55932	1.50787	1.82736	1.51548	2.6606	1.63957	1.93855	0.942644
40861	SeMNPV_Til_40861	1.39429	1.38246	1.54747	1.44141	1.33804	1.52128	1.36998	1.40977	1.02244
40921	SeMNPV_Til_40921	1.43575	1.41331	1.52872	1.45926	1.38071	1.5227	1.40444	1.43595	1.01623
40981	SeMNPV_Til_40981	1.46224	1.50813	1.43305	1.46781	1.42897	1.48611	1.45176	1.45561	1.00838
41041	SeMNPV_Til_41041	2.18758	1.67122	3.74702	2.53527	1.64503	1.65753	1.72013	1.67423	1.51429
41101	SeMNPV_Til_41101	1.43765	1.44755	1.39279	1.42599	1.44253	1.42689	1.44523	1.43821	0.991503
41161	SeMNPV_Til_41161	5.63266	5.51473	5.66326	5.60355	5.19904	5.86133	5.29878	5.45305	1.0276
41221	SeMNPV_Til_41221	3.29825	1.47264	1.39208	2.05432	1.4042	1.44168	1.43575	1.42721	1.4394
41281	SeMNPV_Til_41281	1.50921	1.50346	1.46	1.49089	1.49422	1.49894	1.52764	1.50693	0.989354
41341	SeMNPV_Til_41341	1.66581	1.75209	1.67321	1.69704	1.5032	1.8963	1.47214	1.62388	1.04505
41401	SeMNPV_Til_41401	1.58762	1.64665	1.5612	1.59849	1.56675	1.65701	1.67972	1.6345	0.977972
41461	SeMNPV_Til_41461	1.42691	1.46359	1.39947	1.42999	1.42509	1.43795	1.43376	1.43227	0.998408
41521	SeMNPV_Til_41521	1.61427	1.58876	1.54463	1.58255	1.57045	1.58473	1.64112	1.59877	0.98986
41581	SeMNPV_Til_41581	1.46407	1.39312	1.43551	1.4309	1.49295	1.33167	1.35557	1.3934	1.02691
41641	SeMNPV_Til_41641	1.37602	1.46224	1.28262	1.37363	1.37755	1.39386	1.43112	1.40084	0.980572
41701	SeMNPV_Til_41701	1.70481	1.58446	1.5916	1.62696	1.59471	1.61377	1.64654	1.61834	1.00532
41761	SeMNPV_Til_41761	1.58695	1.53385	1.52866	1.54982	1.5815	1.57702	1.57505	1.57786	0.98223
41821	SeMNPV_Til_41821	1.48577	1.41025	1.60991	1.50198	1.53213	1.43215	1.40757	1.45728	1.03067
41881	SeMNPV_Til_41881	1.30175	1.3288	1.47894	1.36983	1.30325	1.43875	1.29149	1.3445	1.01884
41941	SeMNPV_Til_41941	1.63265	1.54383	1.55353	1.57667	1.55988	1.58605	1.60534	1.58376	0.995525
42001	SeMNPV_Til_42001	1.52795	1.5808	1.51857	1.54244	1.53587	1.5781	1.64912	1.5877	0.971496
42061	SeMNPV_Til_42061	1.49941	1.48433	1.62592	1.53655	1.3608	1.74191	1.41396	1.50556	1.02059
42121	SeMNPV_Til_42121	1.51627	1.49935	1.47714	1.49758	1.53869	1.43421	1.43079	1.4679	1.02022
42181	SeMNPV_Til_42181	2.11126	1.46033	1.36764	1.64641	1.3862	1.42702	4.58181	2.46501	0.667912
42241	SeMNPV_Til_42241	1.57378	1.52553	1.51937	1.53956	1.5322	1.55076	1.57467	1.55254	0.991636
42301	SeMNPV_Til_42301	1.44348	1.41381	1.42675	1.42802	1.48389	1.35605	1.37167	1.40387	1.0172
42361	SeMNPV_Til_42361	1.63466	1.62449	1.63854	1.63257	1.58324	1.62	1.54134	1.58153	1.03227
42421	SeMNPV_Til_42421	2.56235	2.4464	2.8609	2.62322	3.43585	1.52471	1.60067	2.18708	1.19942
42481	SeMNPV_Til_42481	1.41071	1.45507	1.38126	1.41568	1.40297	1.4298	1.93633	1.5897	0.890533
42541	SeMNPV_Til_42541	1.621	1.5007	1.64022	1.58731	1.61781	1.52449	1.52706	1.55645	1.01983
42601	SeMNPV_Til_42601	1.57314	1.61954	1.54041	1.5777	1.56236	1.61586	1.67122	1.61648	0.976009
42661	SeMNPV_Til_42661	1.51904	1.51326	1.62027	1.55086	1.39932	1.74425	1.44323	1.52893	1.01434
42721	SeMNPV_Til_42721	2.323	2.33192	1.39805	2.01766	2.03186	1.37706	1.40534	1.60475	1.2573
42781	SeMNPV_Til_42781	2.71754	2.52152	2.70531	2.64812	1.89733	3.06954	1.39272	2.11986	1.2492
42841	SeMNPV_Til_42841	1.67292	1.75892	1.67537	1.70241	1.51135	1.88101	1.47061	1.62099	1.05023
42901	SeMNPV_Til_42901	2.00762	2.08767	2.03417	2.04316	1.72044	1.52082	1.5751	1.60545	1.27264
42961	SeMNPV_Til_42961	1.42928	1.44676	1.44775	1.44126	1.41958	1.4736	1.47488	1.45602	0.989863
43021	SeMNPV_Til_43021	1.54383	1.61472	2.62478	1.92778	2.70845	1.61087	1.539	1.95277	0.987199
43081	SeMNPV_Til_43081	1.56009	1.54885	1.51116	1.54003	1.5237	1.54834	1.58428	1.5521	0.992223
43141	SeMNPV_Til_43141	1.48695	2.96636	2.99997	2.48443	1.61987	1.4625	1.48791	1.52343	1.63082
43201	SeMNPV_Til_43201	1.62498	1.54239	1.6377	1.60169	1.60887	1.55074	1.54445	1.56802	1.02147
43261	SeMNPV_Til_43261	2.30993	1.35605	1.43431	1.7001	4.96065	3.04611	2.7189	3.57522	0.475522
43321	SeMNPV_Til_43321	1.40392	1.45496	1.36138	1.40675	1.38542	1.42259	1.43009	1.4127	0.995792
43381	SeMNPV_Til_43381	1.56043	1.59017	1.54924	1.56661	1.54246	1.56177	1.51133	1.53852	1.01826
43441	SeMNPV_Til_43441	1.66019	1.44711	1.7084	1.60523	1.65346	1.4945	1.48276	1.54357	1.03995
43501	SeMNPV_Til_43501	1.48723	5.0248	1.47999	2.66401	1.52351	1.45851	1.43639	1.4728	1.8088
43561	SeMNPV_Til_43561	3.54667	3.32922	1.55807	2.81132	3.27695	3.98825	3.59483	3.62001	0.776605
43621	SeMNPV_Til_43621	1.61368	1.55586	3.50131	2.22362	2.25694	3.98054	3.6418	3.29309	0.675237
43681	SeMNPV_Til_43681	1.4421	1.45355	1.3977	1.43111	1.50182	1.43952	1.45245	1.4646	0.977138
43741	SeMNPV_Til_43741	1.46158	1.46966	1.41638	1.44921	1.44478	1.46501	1.49622	1.46867	0.986746
43801	SeMNPV_Til_43801	2.10373	1.87428	2.33948	2.10583	1.65259	1.70231	1.85289	1.73593	1.21309
43861	SeMNPV_Til_43861	1.39494	1.43952	1.35054	1.395	1.40277	1.41684	3.27932	2.03298	0.686187
43921	SeMNPV_Til_43921	1.43509	1.42394	1.39491	1.41798	1.45978	1.39915	1.41762	1.42552	0.994715
43981	SeMNPV_Til_43981	1.43038	4.34169	1.40368	2.39192	1.46517	1.37776	1.40148	1.41481	1.69063
44041	SeMNPV_Til_44041	1.50535	1.30655	1.51295	1.44162	1.46227	2.48933	2.62723	2.19294	0.657389
44101	SeMNPV_Til_44101	1.4385	1.33917	1.43904	1.40557	4.66945	1.29818	2.72352	2.89705	0.485173
44161	SeMNPV_Til_44161	2.81593	3.61776	2.235	2.88957	1.58202	2.47183	2.76285	2.27223	1.27169
44221	SeMNPV_Til_44221	2.08584	1.87604	1.75936	1.90708	1.65783	1.71848	1.84581	1.74071	1.09558
44281	SeMNPV_Til_44281	1.62301	1.55608	1.63535	1.60481	1.41751	1.81648	1.45859	1.56419	1.02597
44341	SeMNPV_Til_44341	1.56138	1.61399	1.57189	1.58242	1.46124	1.68042	1.52475	1.55547	1.01733
44401	SeMNPV_Til_44401	1.41111	1.44317	1.44098	1.43175	1.4192	2.68708	1.50458	1.87029	0.765526
44461	SeMNPV_Til_44461	1.48992	1.48812	2.09689	1.69165	1.49247	1.46886	1.49707	1.48614	1.13828
44521	SeMNPV_Til_44521	1.72175	1.71445	1.74122	1.72581	1.58394	2.76665	1.51975	1.95678	0.881963
44581	SeMNPV_Til_44581	7.1869	6.98485	6.8407	7.00415	6.82694	7.10576	6.63314	6.85528	1.02172
44641	SeMNPV_Til_44641	2.62641	1.45149	1.36061	1.81284	2.72626	2.27055	2.55772	2.51818	0.7199
44701	SeMNPV_Til_44701	1.48316	1.40786	1.45761	1.44954	1.8056	1.33043	1.34691	1.49431	0.97004
44761	SeMNPV_Til_44761	3.51369	2.76637	2.54861	2.94289	3.16468	4.45445	3.97032	3.86315	0.761785
44821	SeMNPV_Til_44821	1.55834	1.52857	1.50975	1.53222	1.53228	1.53884	1.59227	1.55446	0.985692
44881	SeMNPV_Til_44881	1.43949	1.45171	1.39504	1.42875	1.43638	1.43467	1.98576	1.61894	0.882521
44941	SeMNPV_Til_44941	2.72411	1.46003	1.41955	1.86789	1.4802	4.54125	1.43852	2.48666	0.751167
45001	SeMNPV_Til_45001	1.4871	3.04472	1.55115	2.02765	2.53722	1.49437	2.43216	2.15458	0.941089
45061	SeMNPV_Til_45061	3.80302	1.7342	2.56446	2.70056	1.4593	2.12358	2.25621	1.94637	1.38749
45121	SeMNPV_Til_45121	1.44094	1.37858	1.42303	1.41418	2.53249	1.34285	1.36383	1.74639	0.809775
45181	SeMNPV_Til_45181	1.36539	1.42356	1.25749	1.34881	1.36866	1.38706	1.42026	1.39199	0.968982
45241	SeMNPV_Til_45241	4.12744	1.5031	1.524	2.38485	1.55047	1.54441	1.49057	1.52849	1.56027
45301	SeMNPV_Til_45301	1.49929	1.48291	1.63171	1.53797	1.35715	1.75997	1.412	1.50971	1.01872
45361	SeMNPV_Til_45361	1.81238	1.6313	1.86883	1.77084	1.6528	1.65271	1.56567	1.62373	1.0906
45421	SeMNPV_Til_45421	1.48539	1.48527	1.47163	1.48076	1.49782	1.48203	1.46093	1.48026	1.00034
45481	SeMNPV_Til_45481	1.32713	1.33076	3.50576	2.05455	1.29857	1.51935	1.31261	1.37684	1.49222
45541	SeMNPV_Til_45541	1.57341	1.64576	1.55411	1.59109	1.49398	1.63082	1.48702	1.53727	1.03501
45601	SeMNPV_Til_45601	1.65929	1.73519	1.65646	1.68365	1.53355	1.78404	1.48081	1.59947	1.05263
45661	SeMNPV_Til_45661	1.62935	1.7067	1.60892	1.64832	1.58007	1.74039	1.69745	1.67264	0.985464
45721	SeMNPV_Til_45721	1.51767	1.51066	1.46902	1.49912	1.50289	1.50576	1.53752	1.51539	0.989261
45781	SeMNPV_Til_45781	1.37755	1.43542	1.30899	1.37399	1.37534	1.40548	1.45359	1.41147	0.973445
45841	SeMNPV_Til_45841	1.36754	1.42072	1.23581	1.34136	1.37008	1.38629	1.43048	1.39562	0.961121
45901	SeMNPV_Til_45901	1.44029	2.60986	1.42095	1.8237	3.0244	2.11834	3.87972	3.00749	0.606387
45961	SeMNPV_Til_45961	7.8759	7.46752	7.54679	7.63007	7.29222	7.9459	7.30872	7.51561	1.01523
46021	SeMNPV_Til_46021	1.5008	1.47552	1.45749	1.47793	1.52777	1.42192	1.89806	1.61592	0.914612
46081	SeMNPV_Til_46081	1.49973	1.53362	1.4819	1.50508	1.50505	1.53055	1.63067	1.55542	0.967637
46141	SeMNPV_Til_46141	1.40947	1.4326	1.42004	1.4207	1.41227	2.52152	1.48521	1.80633	0.786514
46201	SeMNPV_Til_46201	1.59479	1.55265	1.53169	1.55971	1.83077	1.56403	1.61567	1.67016	0.93387
46261	SeMNPV_Til_46261	3.81339	2.40035	1.69899	2.63758	3.16427	3.81292	3.19213	3.38977	0.778098
46321	SeMNPV_Til_46321	3.89748	4.18499	3.7406	3.94103	4.4582	4.59081	3.57644	4.20848	0.936448
46381	SeMNPV_Til_46381	1.90143	1.76372	1.68008	1.78174	1.66118	1.70519	1.76352	1.70997	1.04197
46441	SeMNPV_Til_46441	1.49967	1.45772	1.47559	1.47766	1.50987	1.35891	1.36809	1.41229	1.04629
46501	SeMNPV_Til_46501	1.80532	1.79257	1.85821	1.8187	1.56941	1.92421	1.46203	1.65188	1.10098
46561	SeMNPV_Til_46561	2.31324	1.35691	1.47065	1.7136	2.07448	1.45419	2.46627	1.99831	0.857525
46621	SeMNPV_Til_46621	4.4558	4.15391	4.63831	4.41601	3.95937	5.20619	4.47009	4.54521	0.971573
46681	SeMNPV_Til_46681	1.55439	1.56957	1.50834	1.5441	1.53581	1.53135	1.59615	1.55444	0.993349
46741	SeMNPV_Til_46741	2.07418	1.63027	2.05124	1.91856	1.67292	1.67942	1.52365	1.62533	1.18041
46801	SeMNPV_Til_46801	1.39137	1.44059	1.36163	1.39786	1.40031	1.41858	1.50556	1.44148	0.969739
46861	SeMNPV_Til_46861	1.43172	1.41464	1.39334	1.41323	1.45941	1.38352	1.4115	1.41814	0.996537
46921	SeMNPV_Til_46921	1.45753	1.42627	1.43921	1.441	1.48759	1.42965	1.75479	1.55735	0.925294
46981	SeMNPV_Til_46981	1.44075	4.33462	1.42019	2.39852	2.10433	2.34708	4.23999	2.89713	0.827894
47041	SeMNPV_Til_47041	1.57832	1.62508	1.56441	1.58927	1.53531	1.60427	1.50466	1.54808	1.02661
47101	SeMNPV_Til_47101	1.75405	1.78196	1.78541	1.77381	1.56201	1.88459	1.47039	1.639	1.08225
47161	SeMNPV_Til_47161	1.43806	1.39014	1.4148	1.41433	1.47782	1.35781	1.3802	1.40527	1.00645
47221	SeMNPV_Til_47221	1.44219	1.45286	1.41879	1.43794	1.45496	2.52249	1.4362	1.80455	0.796843
47281	SeMNPV_Til_47281	1.43889	1.47735	1.41362	1.44329	1.43189	2.36694	1.43921	1.74602	0.826618
47341	SeMNPV_Til_47341	1.41765	1.4664	1.38274	1.42226	1.39829	1.43439	1.47311	1.43526	0.990942
47401	SeMNPV_Til_47401	1.51205	1.50553	1.46677	1.49478	1.4947	1.50892	1.57591	1.52651	0.979213
47461	SeMNPV_Til_47461	2.01004	2.69508	2.02091	2.24201	1.70014	1.57187	1.57556	1.61585	1.38751
47521	SeMNPV_Til_47521	1.71838	1.38593	1.8551	1.65314	1.68658	1.43109	1.43315	1.51694	1.08978
47581	SeMNPV_Til_47581	1.48238	1.47497	1.43512	1.46416	1.49912	1.44094	1.46062	1.46689	0.998134
47641	SeMNPV_Til_47641	1.70166	1.53281	1.58703	1.60717	1.88784	1.59318	1.62301	1.70134	0.944648
47701	SeMNPV_Til_47701	1.43541	1.47417	1.41777	1.44245	1.44524	1.47181	1.58349	1.50018	0.961519
47761	SeMNPV_Til_47761	1.59804	1.99371	1.55687	1.71621	1.57427	1.6386	2.22362	1.81216	0.947047
47821	SeMNPV_Til_47821	1.82506	1.83904	1.68329	1.78246	1.64217	1.78014	1.76556	1.72929	1.03075
47881	SeMNPV_Til_47881	1.56888	1.55162	1.51782	1.54611	1.52285	1.5603	1.58882	1.55732	0.992799
47941	SeMNPV_Til_47941	1.41621	1.45071	1.4095	1.42547	1.41544	1.44323	1.50859	1.45575	0.979199
48001	SeMNPV_Til_48001	1.67705	1.75754	1.67645	1.70368	1.53295	2.59056	1.47399	1.86583	0.913093
48061	SeMNPV_Til_48061	1.45929	1.49121	1.44753	1.46601	1.43281	1.49067	1.51886	1.48078	0.990026
48121	SeMNPV_Til_48121	1.54445	1.57484	1.53475	1.55135	1.52736	2.72387	1.50147	1.91756	0.80902
48181	SeMNPV_Til_48181	3.37729	1.39151	1.41749	2.0621	1.48326	1.3492	1.37362	1.40203	1.4708
48241	SeMNPV_Til_48241	1.63246	2.42592	3.02799	2.36212	2.64608	4.1902	3.18841	3.34156	0.706891
48301	SeMNPV_Til_48301	1.47173	1.47317	1.42297	1.45595	1.47298	1.45109	1.47119	1.46509	0.993765
48361	SeMNPV_Til_48361	2.59523	1.71416	3.22302	2.5108	1.70296	1.46859	1.4585	1.54335	1.62685
48421	SeMNPV_Til_48421	4.13918	3.65044	3.81886	3.86949	4.0963	4.66673	4.20312	4.32205	0.895291
48481	SeMNPV_Til_48481	2.36345	1.50476	2.30173	2.05665	2.7353	2.7459	2.43632	2.63917	0.779276
48541	SeMNPV_Til_48541	1.39659	1.9534	1.35563	1.56854	1.78873	1.41855	1.57401	1.59376	0.984173
48601	SeMNPV_Til_48601	1.47371	1.51973	1.44595	1.4798	1.43271	1.5013	1.48505	1.47302	1.0046
48661	SeMNPV_Til_48661	4.07325	3.74007	4.18333	3.99889	4.11399	4.44465	4.32631	4.29498	0.931061
48721	SeMNPV_Til_48721	1.42509	1.45585	1.38514	1.42203	1.42635	1.43605	1.51977	1.46072	0.973511
48781	SeMNPV_Til_48781	1.39385	1.42661	1.45437	1.42494	2.0386	1.4926	1.44501	1.65873	0.859055
48841	SeMNPV_Til_48841	4.51691	4.10022	4.54523	4.38745	4.16911	3.62168	3.4188	3.73653	1.1742
48901	SeMNPV_Til_48901	1.43356	1.46767	1.42694	1.44272	1.50192	1.46615	1.51151	1.49319	0.966199
48961	SeMNPV_Til_48961	1.46292	1.38493	1.43827	1.42871	1.48859	1.31908	1.33587	1.38118	1.03441
49021	SeMNPV_Til_49021	1.49112	1.53344	1.49915	1.5079	1.49112	1.55255	1.62493	1.5562	0.968966
49081	SeMNPV_Til_49081	1.57406	1.33291	1.52784	1.47827	1.9465	1.46863	1.31329	1.57614	0.937904
49141	SeMNPV_Til_49141	1.43024	1.46955	2.39081	1.76353	1.44138	1.51361	1.87582	1.61027	1.09518
49201	SeMNPV_Til_49201	1.41288	1.41638	1.45025	1.4265	1.73329	2.80027	1.44188	1.99182	0.716182
49261	SeMNPV_Til_49261	1.45559	1.48003	1.41755	1.45105	1.45233	1.47094	1.56922	1.4975	0.968987
49321	SeMNPV_Til_49321	3.23356	1.41652	1.42712	2.02573	1.4035	1.44828	1.45952	1.4371	1.4096
49381	SeMNPV_Til_49381	1.48673	3.45334	1.483	2.14102	1.4429	1.52296	1.52597	1.49728	1.42995
49441	SeMNPV_Til_49441	1.48124	1.51862	1.48728	1.49572	1.48235	1.53815	1.62007	1.54686	0.966936
49501	SeMNPV_Til_49501	1.54141	1.55678	1.49845	1.53221	1.5422	1.50719	1.56957	1.53965	0.995168
49561	SeMNPV_Til_49561	1.74018	1.69034	3.18233	2.20429	2.50062	2.29101	1.40846	2.06669	1.06658
49621	SeMNPV_Til_49621	2.33247	2.90984	1.4041	2.21547	2.76911	2.80173	2.99639	2.85574	0.775793
49681	SeMNPV_Til_49681	3.65546	3.34402	1.86448	2.95465	1.67912	1.40498	1.42677	1.50362	1.96502
49741	SeMNPV_Til_49741	1.50687	1.49634	1.45882	1.48734	1.48124	1.50255	2.12516	1.70298	0.873376
49801	SeMNPV_Til_49801	1.49938	2.43888	1.47797	1.80541	1.45344	2.55078	1.46457	1.82293	0.990389
49861	SeMNPV_Til_49861	1.63212	1.70301	1.62498	1.65337	1.52873	1.72022	1.92767	1.72554	0.958176
49921	SeMNPV_Til_49921	2.75857	1.80418	1.87958	2.14744	1.71909	3.81721	3.36865	2.96831	0.723455
49981	SeMNPV_Til_49981	1.55327	1.62795	1.53671	1.57264	1.4712	2.53132	1.50134	1.83462	0.857202
50041	SeMNPV_Til_50041	1.41705	1.44554	1.36979	1.41079	1.41481	1.42594	1.48154	1.44076	0.979201
50101	SeMNPV_Til_50101	1.51107	1.56655	1.49798	1.5252	1.45057	1.5475	1.51659	1.50489	1.0135
50161	SeMNPV_Til_50161	1.57886	1.63008	1.5488	1.58591	1.7431	2.65995	1.67469	2.02591	0.782813
50221	SeMNPV_Til_50221	1.44067	1.38454	1.41733	1.41418	1.47947	1.34764	1.37114	1.39942	1.01055
50281	SeMNPV_Til_50281	1.47143	1.4736	1.96899	1.63801	1.45114	1.54514	1.48501	1.49376	1.09657
50341	SeMNPV_Til_50341	1.70513	1.59033	1.63466	1.64337	1.66687	2.6963	1.47501	1.94606	0.844461
50401	SeMNPV_Til_50401	1.45858	1.4547	1.43881	1.45069	1.47552	1.44638	3.00712	1.97634	0.734032
50461	SeMNPV_Til_50461	1.42518	1.45154	2.21542	1.69738	1.77828	1.46266	1.49579	1.57891	1.07503
50521	SeMNPV_Til_50521	1.58728	1.53581	1.52932	1.5508	1.99828	1.58174	1.58158	1.72054	0.901349
50581	SeMNPV_Til_50581	2.4222	1.36163	1.47448	1.75277	1.51634	1.44351	1.35054	1.4368	1.21991
50641	SeMNPV_Til_50641	1.51239	1.40099	1.40633	1.43991	1.46961	1.37274	1.39589	1.41275	1.01922
50701	SeMNPV_Til_50701	2.96519	1.57337	1.49307	2.01054	1.48831	1.48811	2.65709	1.87783	1.07067
50761	SeMNPV_Til_50761	1.45294	2.78938	2.40137	2.21456	1.55565	1.46124	1.56699	1.52796	1.44936
50821	SeMNPV_Til_50821	1.67668	1.67055	1.68052	1.67592	1.58437	1.91177	1.53457	1.6769	0.999412
50881	SeMNPV_Til_50881	1.60435	1.52794	1.53794	1.55674	1.54034	1.57603	1.57482	1.56373	0.995533
50941	SeMNPV_Til_50941	1.77668	2.25536	2.95564	2.32923	1.55854	1.66904	1.51527	1.58095	1.47331
51001	SeMNPV_Til_51001	3.41381	2.92421	2.94405	3.09402	3.21593	3.49151	4.30625	3.67123	0.842776
51061	SeMNPV_Til_51061	1.46791	1.47135	1.41937	1.45288	1.46419	1.45413	1.47008	1.4628	0.993216
51121	SeMNPV_Til_51121	2.90901	3.34938	2.48642	2.91494	2.28974	1.44819	3.29952	2.34582	1.24261
51181	SeMNPV_Til_51181	2.22675	2.14817	2.48154	2.28549	2.42468	1.62746	2.52592	2.19269	1.04232
51241	SeMNPV_Til_51241	1.60604	1.67897	2.37749	1.8875	2.98979	3.66018	3.55109	3.40035	0.55509
51301	SeMNPV_Til_51301	1.51401	1.53637	1.50515	1.51851	1.50172	1.51928	1.48122	1.50074	1.01184
51361	SeMNPV_Til_51361	1.60856	1.5376	1.53967	1.56194	1.55138	1.57275	1.59155	1.5719	0.993667
51421	SeMNPV_Til_51421	1.35188	1.36171	1.60289	1.43883	1.31159	1.60682	1.74033	1.55291	0.926534
51481	SeMNPV_Til_51481	2.26997	3.23396	3.7447	3.08288	3.83466	4.02838	3.65161	3.83822	0.803206
51541	SeMNPV_Til_51541	3.9226	2.4222	2.48564	2.94348	3.47208	3.00759	3.77217	3.41728	0.861351
51601	SeMNPV_Til_51601	1.45024	1.47599	1.41344	1.44656	1.44833	1.46548	1.55943	1.49108	0.97014
51661	SeMNPV_Til_51661	1.2924	2.43509	1.4887	1.73873	1.79859	1.42759	1.27223	1.49947	1.15956
51721	SeMNPV_Til_51721	1.38421	1.4162	1.42255	1.40765	1.40231	1.45137	2.93174	1.92847	0.72993
51781	SeMNPV_Til_51781	2.68708	2.78619	3.21607	2.89645	2.36016	1.43797	2.83491	2.21101	1.31001
51841	SeMNPV_Til_51841	1.39898	1.43827	1.39583	1.41103	1.41416	1.43409	1.52144	1.45656	0.968736
51901	SeMNPV_Til_51901	5.11197	5.62351	5.26692	5.33413	5.10501	5.56771	5.22093	5.29788	1.00684
51961	SeMNPV_Til_51961	1.49684	1.48447	1.44953	1.47695	1.51619	1.44299	1.45862	1.4726	1.00295
52021	SeMNPV_Til_52021	1.59113	1.5905	1.53349	1.5717	1.56494	1.57594	1.64644	1.59577	0.984916
52081	SeMNPV_Til_52081	3.50749	4.46009	3.59396	3.85385	3.48413	3.52653	3.72598	3.57888	1.07683
52141	SeMNPV_Til_52141	2.29101	1.43618	1.33917	1.68878	1.39764	1.87938	2.83082	2.03594	0.829483
52201	SeMNPV_Til_52201	1.44707	1.47181	1.40955	1.44281	1.44359	1.50405	1.5455	1.49771	0.963342
52261	SeMNPV_Til_52261	1.6563	1.74159	1.65973	1.68587	1.50433	2.31713	1.47576	1.76574	0.954769
52321	SeMNPV_Til_52321	2.74557	1.41599	3.92861	2.69672	2.18001	2.48746	2.70149	2.45632	1.09787
52381	SeMNPV_Til_52381	1.42753	3.4308	1.40901	2.08911	1.41667	1.45036	1.50749	1.45817	1.43269
52441	SeMNPV_Til_52441	1.56123	1.52153	1.51146	1.53141	1.52577	1.54141	1.57317	1.54678	0.99006
52501	SeMNPV_Til_52501	1.44356	1.38549	2.37325	1.7341	2.60235	1.36214	1.37858	1.78102	0.973655
52561	SeMNPV_Til_52561	1.54825	1.51583	1.50191	1.52199	1.51311	1.53281	1.55752	1.53448	0.991863
52621	SeMNPV_Til_52621	1.58128	1.5982	1.69427	1.62458	2.07631	5.84094	1.43529	3.11751	0.521115
52681	SeMNPV_Til_52681	1.94578	1.92741	1.76099	1.87806	1.63319	1.82874	1.80734	1.75642	1.06925
52741	SeMNPV_Til_52741	1.47684	1.50584	1.45181	1.47816	1.48174	1.50512	1.61664	1.5345	0.963287
52801	SeMNPV_Til_52801	1.40129	1.44878	1.37131	1.40713	1.39951	1.42316	1.49645	1.43971	0.977372
52861	SeMNPV_Til_52861	2.49373	1.73694	2.85915	2.36327	3.38706	3.38471	2.14914	2.97364	0.794741
52921	SeMNPV_Til_52921	1.77384	3.12792	1.94449	2.28208	1.69855	1.33755	1.40543	1.48051	1.54142
52981	SeMNPV_Til_52981	1.47246	1.47143	1.70598	1.54996	1.42292	1.54255	2.40111	1.78886	0.86645
53041	SeMNPV_Til_53041	1.39937	1.40051	1.48283	1.42757	1.37475	1.47754	1.40117	1.41782	1.00688
53101	SeMNPV_Til_53101	1.39721	1.71909	1.3644	1.49357	1.39637	1.42046	1.49091	1.43591	1.04015
53161	SeMNPV_Til_53161	1.54781	1.52343	1.50113	1.52412	1.51076	1.53657	1.55268	1.53334	0.99399
53221	SeMNPV_Til_53221	1.40575	1.45609	1.36521	1.40902	1.39023	1.42389	1.46793	1.42735	0.987157
53281	SeMNPV_Til_53281	1.46173	1.35543	1.46767	1.42828	1.80099	1.3397	1.33833	1.493	0.956647
53341	SeMNPV_Til_53341	1.45511	1.49537	1.52229	1.49092	2.7059	1.59237	1.86032	2.05286	0.726265
53401	SeMNPV_Til_53401	1.63105	1.55414	1.67928	1.62149	1.56339	1.58544	1.61573	1.58819	1.02097
53461	SeMNPV_Til_53461	6.15868	5.67849	6.15947	5.99888	5.80952	6.13061	5.94013	5.96009	1.00651
53521	SeMNPV_Til_53521	9.26588	10.1699	11.0442	10.16	10.5737	10.8046	10.6521	10.6768	0.951597
53581	SeMNPV_Til_53581	4.14269	1.34691	1.60534	2.36498	2.02915	2.77965	1.32954	2.04611	1.15584
53641	SeMNPV_Til_53641	2.89613	1.58162	4.83383	3.10386	3.03218	2.97759	3.43779	3.14919	0.985605
53701	SeMNPV_Til_53701	1.54499	1.60008	1.49912	1.54806	1.53651	1.5535	1.58234	1.55745	0.993971
53761	SeMNPV_Til_53761	1.467	1.49742	1.44412	1.46951	1.45248	1.4821	1.45145	1.46201	1.00513
53821	SeMNPV_Til_53821	1.86883	1.88423	1.71909	1.82405	1.63905	1.82119	1.78352	1.74792	1.04355
53881	SeMNPV_Til_53881	1.36648	1.41017	1.48595	1.42087	1.35296	1.51593	1.3922	1.42036	1.00035
53941	SeMNPV_Til_53941	1.60201	1.38301	1.65173	1.54558	1.62059	1.43094	1.39641	1.48264	1.04245
54001	SeMNPV_Til_54001	1.70679	1.78848	1.64857	1.71461	1.61225	1.78043	1.73446	1.70905	1.00326
54061	SeMNPV_Til_54061	1.53418	1.54037	1.48832	1.52096	1.53441	1.50673	1.5597	1.53361	0.991748
54121	SeMNPV_Til_54121	1.50643	1.50437	1.48757	1.49946	1.50423	1.40039	1.39682	1.43381	1.04578
54181	SeMNPV_Til_54181	1.33959	1.46065	1.46218	1.4208	1.34091	1.44723	1.37016	1.3861	1.02504
54241	SeMNPV_Til_54241	1.44339	1.4362	1.42074	1.43344	1.46424	1.42983	1.4289	1.44099	0.994762
54301	SeMNPV_Til_54301	1.71505	1.75101	1.7258	1.73062	2.13274	1.80717	1.4908	1.81024	0.956017
54361	SeMNPV_Til_54361	1.41597	1.41044	1.48018	1.43553	1.39224	1.48245	1.41285	1.42918	1.00444
54421	SeMNPV_Til_54421	1.47605	1.47061	1.42804	1.45823	2.13311	1.43804	1.89935	1.8235	0.799688
54481	SeMNPV_Til_54481	2.66551	1.66231	1.67518	2.001	1.66884	2.11451	1.75115	1.84483	1.08465
54541	SeMNPV_Til_54541	2.45005	1.59129	3.27281	2.43805	1.86583	1.57136	1.65369	1.69696	1.43672
54601	SeMNPV_Til_54601	1.3934	2.19785	1.41325	1.66817	1.50206	3.2001	1.6601	2.12075	0.786592
54661	SeMNPV_Til_54661	1.94711	1.69427	1.96231	1.8679	1.63155	2.89324	1.51199	2.01226	0.928258
54721	SeMNPV_Til_54721	1.64644	1.60671	1.56385	1.60567	1.58567	1.61009	1.65589	1.61722	0.992857
54781	SeMNPV_Til_54781	4.47319	4.54334	4.39835	4.47163	3.66271	5.46867	3.98805	4.37315	1.02252
54841	SeMNPV_Til_54841	1.46746	1.51021	1.54149	1.50638	1.42271	1.63624	1.48555	1.51483	0.994422
54901	SeMNPV_Til_54901	1.42159	1.46517	1.39053	1.42576	1.41138	1.43608	4.5334	2.46029	0.579511
54961	SeMNPV_Til_54961	1.44135	1.37516	1.42368	1.41339	1.47827	1.33309	1.35715	1.3895	1.01719
55021	SeMNPV_Til_55021	1.40901	2.41756	1.3853	1.73729	1.42082	1.43378	1.53898	1.46453	1.18625
55081	SeMNPV_Til_55081	1.43127	1.44564	1.3851	1.42067	1.42581	1.43052	1.44551	1.43395	0.99074
55141	SeMNPV_Til_55141	1.42727	1.45455	2.73572	1.87251	1.42068	1.46344	1.49959	1.46124	1.28146
55201	SeMNPV_Til_55201	1.53898	1.53326	1.493	1.52175	1.517	1.52555	1.56195	1.53483	0.991476
55261	SeMNPV_Til_55261	1.69927	1.60458	1.59152	1.63179	1.59961	1.62059	1.65905	1.62642	1.0033
55321	SeMNPV_Til_55321	1.4371	1.41378	1.53074	1.46054	1.38023	1.52492	1.40416	1.43643	1.01678
55381	SeMNPV_Til_55381	1.34039	2.67875	3.39709	2.47208	2.97195	3.83493	2.24309	3.01666	0.819475
55441	SeMNPV_Til_55441	1.50923	1.56849	1.4914	1.52304	1.4591	1.5333	1.46894	1.48711	1.02416
55501	SeMNPV_Til_55501	1.47275	1.47412	1.42566	1.45751	1.52875	1.47248	1.47826	1.49316	0.976122
55561	SeMNPV_Til_55561	1.43833	1.47369	1.4286	1.44687	1.42466	1.47069	1.51409	1.46981	0.984393
55621	SeMNPV_Til_55621	3.12759	1.86417	1.69457	2.22878	1.77738	1.82618	1.76317	1.78891	1.24588
55681	SeMNPV_Til_55681	1.42264	1.4657	1.55529	1.48121	1.33587	1.65761	1.37746	1.45698	1.01663
55741	SeMNPV_Til_55741	1.60258	1.69235	1.61284	1.63593	1.5586	1.77262	1.67842	1.66988	0.979666
55801	SeMNPV_Til_55801	3.87795	2.24106	2.41668	2.84523	3.83203	3.60104	4.04804	3.82704	0.743455
55861	SeMNPV_Til_55861	1.52266	1.51916	1.47643	1.50608	1.53607	1.48237	1.52685	1.51509	0.994053
55921	SeMNPV_Til_55921	1.46248	1.43645	1.41824	1.43906	1.48949	1.40641	1.41402	1.43664	1.00168
55981	SeMNPV_Til_55981	1.51829	1.54469	1.48916	1.51738	1.79765	1.53248	1.63246	1.6542	0.917292
56041	SeMNPV_Til_56041	1.50433	1.52898	1.4749	1.50273	3.08896	1.5233	2.0556	2.22262	0.676109
56101	SeMNPV_Til_56101	3.87941	4.10554	4.0491	4.01135	3.65115	3.3864	4.36111	3.79955	1.05574
56161	SeMNPV_Til_56161	1.65006	1.40144	1.71291	1.58814	1.65167	1.45985	1.42971	1.51375	1.04914
56221	SeMNPV_Til_56221	2.78802	1.44445	1.41852	1.88366	1.45901	2.47155	2.98286	2.30448	0.817393
56281	SeMNPV_Til_56281	1.4558	1.4192	1.43453	1.43651	1.48003	1.30551	1.7307	1.50541	0.95423
56341	SeMNPV_Til_56341	1.38893	1.42287	1.41808	1.40996	1.40698	1.44844	1.48026	1.44523	0.975597
56401	SeMNPV_Til_56401	1.49996	1.52766	1.48597	1.50453	1.48229	1.51152	1.46994	1.48792	1.01117
56461	SeMNPV_Til_56461	4.27864	3.10745	3.72514	3.70374	4.39738	4.33146	4.33325	4.35403	0.850647
56521	SeMNPV_Til_56521	1.68166	1.61083	1.5782	1.62356	1.58217	1.60445	1.63155	1.60606	1.0109
56581	SeMNPV_Til_56581	1.47072	3.13909	1.44676	2.01886	1.45118	2.18344	1.45924	1.69795	1.18899
56641	SeMNPV_Til_56641	1.49281	1.35122	1.51736	1.45379	1.6213	1.35853	1.34372	1.44119	1.00875
56701	SeMNPV_Til_56701	1.46955	1.48863	1.43083	1.463	1.62744	1.48235	1.58238	1.56406	0.935387
56761	SeMNPV_Til_56761	1.45568	1.46527	1.41133	1.44409	1.44025	1.45868	1.48231	1.46041	0.988826
56821	SeMNPV_Til_56821	3.56878	3.38891	2.9992	3.31896	4.05292	4.51037	3.69732	4.08687	0.812104
56881	SeMNPV_Til_56881	1.86205	2.90023	2.53078	2.43102	1.61043	1.90038	1.77621	1.76234	1.37943
56941	SeMNPV_Til_56941	1.53127	1.58552	1.52062	1.5458	1.53938	1.58253	1.65182	1.59124	0.971444
57001	SeMNPV_Til_57001	7.55106	7.21626	7.36552	7.37761	6.87018	7.59648	6.99965	7.15544	1.03105
57061	SeMNPV_Til_57061	1.63365	4.96509	1.49526	2.698	3.3004	3.43544	3.72463	3.48682	0.773771
57121	SeMNPV_Til_57121	1.55126	1.54404	2.62019	1.90516	1.52283	1.53735	1.57784	1.54601	1.23231
57181	SeMNPV_Til_57181	1.42683	1.43481	1.74957	1.53707	1.43703	2.63216	1.43618	1.83512	0.837584
57241	SeMNPV_Til_57241	1.57898	2.5767	1.5237	1.89313	1.52175	2.43578	1.56867	1.84207	1.02772
57301	SeMNPV_Til_57301	1.67394	1.46593	1.72358	1.62115	1.65796	1.50561	1.51146	1.55834	1.0403
57361	SeMNPV_Til_57361	8.05711	7.77203	7.73475	7.85463	7.50695	8.09382	7.59735	7.73271	1.01577
57421	SeMNPV_Til_57421	1.58075	1.62013	1.56678	1.58922	1.54513	1.60004	1.51111	1.55209	1.02392
57481	SeMNPV_Til_57481	1.98746	1.93091	1.77396	1.89744	1.6313	1.80418	1.82057	1.75201	1.08301
57541	SeMNPV_Til_57541	1.92393	1.57674	1.95788	1.81952	1.69136	1.60076	1.57892	1.62368	1.12061
57601	SeMNPV_Til_57601	1.756	1.38415	1.89489	1.67835	2.48154	2.93899	1.44369	2.28807	0.73352
57661	SeMNPV_Til_57661	1.95946	1.74028	1.99146	1.89707	1.58088	1.962	1.42368	1.65552	1.1459
57721	SeMNPV_Til_57721	1.39968	1.4546	4.55606	2.47011	1.37944	1.90636	2.14875	1.81152	1.36356
57781	SeMNPV_Til_57781	1.55159	1.52879	1.50558	1.52865	1.53068	1.53577	1.59755	1.55467	0.983268
57841	SeMNPV_Til_57841	1.45329	1.46052	1.40761	1.44047	1.44437	1.44507	1.45834	1.44926	0.993935
57901	SeMNPV_Til_57901	1.8246	1.7257	1.86929	1.80653	1.60557	1.79236	1.51548	1.6378	1.10302
57961	SeMNPV_Til_57961	3.35303	3.01768	3.92329	3.43134	3.575	4.13248	3.8485	3.852	0.890794
58021	SeMNPV_Til_58021	1.71574	1.67849	1.73694	1.71039	1.59877	1.69317	1.53953	1.61049	1.06203
58081	SeMNPV_Til_58081	2.22327	1.44888	1.37939	1.68385	1.42013	1.43124	1.47599	1.44245	1.16735
58141	SeMNPV_Til_58141	1.93314	1.92857	1.75947	1.87373	1.63113	1.8373	1.8038	1.75741	1.06619
58201	SeMNPV_Til_58201	2.83334	5.5649	2.81474	3.73766	3.58008	3.58885	3.64941	3.60611	1.03648
58261	SeMNPV_Til_58261	1.40299	2.04765	1.42456	1.62507	1.41777	1.46552	1.51113	1.46481	1.10941
58321	SeMNPV_Til_58321	2.57634	1.64322	1.6322	1.95059	1.63088	1.64436	1.69537	1.65687	1.17727
58381	SeMNPV_Til_58381	1.48169	1.51551	1.46024	1.48581	1.45842	2.14372	1.95605	1.85273	0.801959
58441	SeMNPV_Til_58441	1.37137	1.41152	1.47187	1.41825	1.36034	1.50458	1.40329	1.42274	0.99685
58501	SeMNPV_Til_58501	1.39286	1.44172	1.48057	1.43838	1.40117	1.42	1.5065	1.44256	0.997107
58561	SeMNPV_Til_58561	1.79319	1.4625	3.06476	2.10682	1.87657	1.46822	1.5604	1.63506	1.28852
58621	SeMNPV_Til_58621	1.6384	2.40701	1.55647	1.86729	2.6843	2.16742	1.56928	2.14033	0.872429
58681	SeMNPV_Til_58681	1.82932	1.47698	1.91836	1.74155	1.69779	1.51201	1.55517	1.58832	1.09647
58741	SeMNPV_Til_58741	1.43844	1.42976	1.39768	1.42196	1.46085	1.4061	1.42429	1.43041	0.994091
58801	SeMNPV_Til_58801	1.91993	1.47959	1.98023	1.79325	1.71432	2.77676	1.56662	2.01923	0.888084
58861	SeMNPV_Til_58861	1.42838	1.42342	1.38577	1.41252	1.44988	1.40035	1.42255	1.42426	0.991756
58921	SeMNPV_Til_58921	1.62545	1.62292	1.62727	1.62521	1.57759	1.61651	1.53798	1.57736	1.03034
58981	SeMNPV_Til_58981	1.56967	1.6601	1.61018	1.61332	1.52084	1.78827	1.64744	1.65218	0.976475
59041	SeMNPV_Til_59041	1.43367	1.40381	1.58317	1.47355	1.33976	1.59794	1.38377	1.44049	1.02295
59101	SeMNPV_Til_59101	1.67111	1.71741	1.66894	1.68582	1.55696	1.74205	1.93296	1.74399	0.966647
59161	SeMNPV_Til_59161	1.44551	1.37243	1.435	1.41765	1.48461	1.34185	1.35798	1.39481	1.01637
59221	SeMNPV_Til_59221	1.49431	1.41368	1.4959	1.46796	1.54296	1.43962	1.4106	1.4644	1.00243
59281	SeMNPV_Til_59281	1.48084	1.51283	1.46308	1.48558	1.48655	1.51556	1.62151	1.5412	0.96391
59341	SeMNPV_Til_59341	5.91889	6.42501	6.19543	6.17978	6.11469	6.41328	6.16449	6.23082	0.991809
59401	SeMNPV_Til_59401	1.46501	1.50502	1.51842	1.49615	1.44107	1.58268	1.54488	1.52288	0.982451
59461	SeMNPV_Til_59461	1.44936	1.40461	1.41427	1.42275	1.48413	1.36605	1.38941	1.4132	1.00676
59521	SeMNPV_Til_59521	1.83593	1.75627	1.87798	1.82339	1.59231	1.85265	1.48573	1.64356	1.10941
59581	SeMNPV_Til_59581	1.37108	1.41913	1.28642	1.35887	2.34558	1.3852	3.18736	2.30605	0.589265
59641	SeMNPV_Til_59641	2.86531	2.9752	2.83252	2.89101	2.49964	3.51421	3.22673	3.08019	0.938582
59701	SeMNPV_Til_59701	1.35635	1.40206	1.49326	1.41722	1.33821	1.51916	1.37602	1.41113	1.00432
59761	SeMNPV_Til_59761	1.48276	1.33511	1.50923	1.44237	1.5185	1.33941	2.60179	1.8199	0.792555
59821	SeMNPV_Til_59821	1.50841	1.56283	1.49577	1.52233	1.44982	1.54445	1.51797	1.50408	1.01214
59881	SeMNPV_Til_59881	1.28855	1.28989	1.57314	1.38386	1.27956	1.50725	1.40392	1.39691	0.990656
59941	SeMNPV_Til_59941	1.53651	2.36142	1.51143	1.80312	1.88101	2.68916	1.64738	2.07252	0.870015
60001	SeMNPV_Til_60001	1.71305	1.60329	1.59586	1.6374	1.60188	1.6213	1.65973	1.62764	1.006
60061	SeMNPV_Til_60061	1.33309	1.35928	1.49225	1.39487	1.32836	1.44924	1.34634	1.37464	1.01472
60121	SeMNPV_Til_60121	3.87206	4.2686	3.66491	3.93519	4.79344	3.02647	3.20729	3.67574	1.07059
60181	SeMNPV_Til_60181	1.56147	1.56701	1.5176	1.54869	1.50356	2.30443	2.76393	2.19064	0.70696
60241	SeMNPV_Til_60241	1.49238	1.48844	1.48166	1.48749	1.48326	1.3623	1.37682	1.40746	1.05686
60301	SeMNPV_Til_60301	1.5864	1.69582	1.66459	1.64894	1.48817	1.94096	2.09623	1.84179	0.895291
60361	SeMNPV_Til_60361	1.31976	1.35901	1.46922	1.38267	1.31908	1.44864	1.33521	1.36764	1.01098
60421	SeMNPV_Til_60421	1.64126	1.62098	1.56343	1.60856	1.58825	1.61771	1.66687	1.62428	0.990322
60481	SeMNPV_Til_60481	1.51118	1.56575	1.95103	1.67599	1.46667	1.53162	1.46889	1.48906	1.12553
60541	SeMNPV_Til_60541	2.08723	2.64569	2.06186	2.26492	3.21901	3.42532	2.6339	3.09275	0.732334
60601	SeMNPV_Til_60601	1.40902	2.82713	3.25856	2.49824	1.41965	1.43127	2.28795	1.71295	1.45844
60661	SeMNPV_Til_60661	6.61036	6.59493	6.60116	6.60215	6.52556	6.79101	6.53569	6.61742	0.997693
60721	SeMNPV_Til_60721	1.42399	1.45967	1.52542	1.46969	1.43058	1.44104	1.54322	1.47161	0.998696
60781	SeMNPV_Til_60781	1.29592	1.30482	1.58916	1.39663	1.28377	1.54914	1.28431	1.37241	1.01765
60841	SeMNPV_Til_60841	1.73002	1.75269	1.85082	1.77785	1.4684	2.11191	1.41164	1.66398	1.06843
60901	SeMNPV_Til_60901	1.81349	1.7967	1.89609	1.83543	1.51672	2.08905	1.41181	1.67252	1.0974
60961	SeMNPV_Til_60961	1.37874	1.4144	2.81437	1.86917	1.36224	1.50849	1.40649	1.42574	1.31102
61021	SeMNPV_Til_61021	3.49282	3.96162	2.76101	3.40515	3.59768	4.10788	3.83229	3.84595	0.885386
61081	SeMNPV_Til_61081	1.39908	1.43695	1.39887	1.41163	1.41365	1.43512	1.51793	1.45557	0.969816
61141	SeMNPV_Til_61141	1.54496	1.52061	1.49849	1.52135	1.8911	2.37823	2.23008	2.16647	0.702226
61201	SeMNPV_Til_61201	1.49209	2.9506	1.41053	1.95107	2.16715	1.44028	2.90138	2.1696	0.899276
61261	SeMNPV_Til_61261	1.51023	1.55988	1.50229	1.52413	1.45071	1.5497	1.52439	1.50827	1.01052
61321	SeMNPV_Til_61321	1.468	1.47483	1.42274	1.45519	1.45063	3.19905	1.51352	2.0544	0.708328
61381	SeMNPV_Til_61381	1.35605	1.40359	1.51374	1.42446	1.32713	1.54532	1.36072	1.41106	1.0095
61441	SeMNPV_Til_61441	12.5589	12.338	12.3743	12.4237	12.2973	12.7554	12.6417	12.5648	0.988772
61501	SeMNPV_Til_61501	1.55188	1.55692	1.50521	1.538	1.53176	1.53224	1.58812	1.5507	0.99181
61561	SeMNPV_Til_61561	9.51865	8.24557	8.79098	8.85173	8.56337	8.56054	9.18676	8.77022	1.00929
61621	SeMNPV_Til_61621	1.63181	1.69087	1.66589	1.66286	1.46764	1.93591	1.48018	1.62791	1.02147
61681	SeMNPV_Til_61681	1.48448	1.46145	1.45014	1.46536	1.43079	1.49744	1.53455	1.48759	0.985051
61741	SeMNPV_Til_61741	1.52208	1.54648	1.49602	1.52153	1.51923	1.45817	1.47552	1.48431	1.02508
61801	SeMNPV_Til_61801	1.39178	1.4215	1.32542	1.37957	1.68689	1.3986	1.42402	1.50317	0.917771
61861	SeMNPV_Til_61861	1.61651	1.45981	2.0359	1.70407	1.75695	1.59748	1.43896	1.5978	1.06651
61921	SeMNPV_Til_61921	1.8453	1.76724	1.88887	1.8338	1.58731	1.88254	1.47266	1.6475	1.11308
61981	SeMNPV_Til_61981	1.45441	1.47206	2.36512	1.76386	1.44492	2.4808	3.71934	2.54835	0.692159
62041	SeMNPV_Til_62041	1.48817	3.27971	1.5466	2.10483	1.59216	2.31537	1.45675	1.7881	1.17714
62101	SeMNPV_Til_62101	1.6545	2.09689	1.57031	1.7739	1.59255	1.62116	1.66741	1.62704	1.09026
62161	SeMNPV_Til_62161	1.48542	1.52367	1.44315	1.48408	1.70311	1.4074	1.40732	1.50595	0.98548
62221	SeMNPV_Til_62221	1.45876	1.37721	1.43784	1.4246	1.48115	1.30225	1.31888	1.36742	1.04181
62281	SeMNPV_Til_62281	1.42784	1.467	1.56162	1.48549	1.4385	1.46145	1.56911	1.48969	0.997179
62341	SeMNPV_Til_62341	2.77392	1.4865	2.03639	2.09894	2.00181	1.48086	1.59264	1.69177	1.24068
62401	SeMNPV_Til_62401	1.48832	1.48725	1.43972	1.47176	1.49028	1.46877	1.49573	1.48493	0.991133
62461	SeMNPV_Til_62461	1.57401	2.79556	1.55495	1.97484	1.49329	2.79847	2.0443	2.11202	0.935048
62521	SeMNPV_Til_62521	1.48949	1.54802	1.57599	1.53783	1.42102	1.72095	1.4887	1.54356	0.996293
62581	SeMNPV_Til_62581	1.62493	1.68854	1.61651	1.64333	1.53465	2.38435	2.95009	2.2897	0.717704
62641	SeMNPV_Til_62641	2.22226	1.37973	2.80514	2.13571	1.48255	1.35039	1.50157	1.44483	1.47817
62701	SeMNPV_Til_62701	1.52764	1.56144	1.49938	1.52949	1.52233	1.47793	1.53074	1.51033	1.01268
62761	SeMNPV_Til_62761	5.5076	1.39437	1.62418	2.84205	1.30899	1.68417	1.37108	1.45475	1.95364
62821	SeMNPV_Til_62821	2.98979	1.54455	1.5594	2.03125	1.56232	1.59258	1.60898	1.58796	1.27916
62881	SeMNPV_Til_62881	1.69479	2.66551	1.61642	1.99224	1.61597	1.69076	1.71649	1.67441	1.18982
62941	SeMNPV_Til_62941	1.7622	1.71341	1.80717	1.76093	1.59748	2.79185	1.52479	1.97138	0.893247
63001	SeMNPV_Til_63001	1.46402	1.50482	1.52727	1.49871	1.43183	1.60694	1.51539	1.51805	0.987254
63061	SeMNPV_Til_63061	2.9255	1.41686	1.40857	1.91698	1.44859	3.96613	1.41513	2.27662	0.842028
63121	SeMNPV_Til_63121	1.41652	1.45093	1.49293	1.45346	1.39031	2.5286	1.43257	1.78383	0.814799
63181	SeMNPV_Til_63181	7.68117	7.95247	8.04488	7.89284	7.05772	6.16791	7.76637	6.99733	1.12798
63241	SeMNPV_Til_63241	1.43645	2.2921	2.42532	2.05129	1.94763	1.37436	1.40007	1.57402	1.30322
63301	SeMNPV_Til_63301	4.13573	4.02989	3.79073	3.98545	3.97915	4.8828	4.23609	4.36601	0.912835
63361	SeMNPV_Til_63361	1.58955	1.62795	1.64503	1.62085	1.44642	1.87071	1.48704	1.60139	1.01215
63421	SeMNPV_Til_63421	1.56911	1.66801	1.6414	1.62617	1.48814	1.88036	1.62727	1.66526	0.976529
63481	SeMNPV_Til_63481	2.07707	1.48269	2.08123	1.88033	1.72745	1.51151	1.56893	1.60263	1.17328
63541	SeMNPV_Til_63541	1.6148	1.6152	1.54997	1.59332	1.57841	1.60671	1.66337	1.61616	0.985868
63601	SeMNPV_Til_63601	1.37011	1.42841	1.28008	1.35954	1.37317	1.39692	1.44953	1.40654	0.966583
63661	SeMNPV_Til_63661	1.49295	1.4484	1.36866	1.43667	1.39826	1.42221	2.26867	1.69638	0.846902
63721	SeMNPV_Til_63721	1.85396	1.6571	1.89999	1.80368	1.64707	1.68681	1.55275	1.62888	1.10732
63781	SeMNPV_Til_63781	1.45041	1.45904	1.40584	1.43843	1.43825	1.44717	1.45895	1.44812	0.993303
63841	SeMNPV_Til_63841	1.4734	2.44382	1.59311	1.83678	1.36008	1.97211	1.40802	1.58007	1.16247
63901	SeMNPV_Til_63901	1.59606	1.578	1.59368	1.58925	1.57603	1.56624	1.53607	1.55944	1.01911
63961	SeMNPV_Til_63961	1.80492	1.92793	1.75928	1.83071	1.59237	1.94063	1.7537	1.76223	1.03886
64021	SeMNPV_Til_64021	1.35173	1.38335	1.45805	1.39771	1.35064	1.45027	3.66607	2.15566	0.648391
64081	SeMNPV_Til_64081	2.84265	1.42305	2.36629	2.21066	1.39808	1.40236	1.42633	1.40892	1.56905
64141	SeMNPV_Til_64141	1.59089	1.65193	1.57396	1.60559	1.51986	2.68574	1.4943	1.89997	0.845064
64201	SeMNPV_Til_64201	1.58241	1.55909	1.52583	1.55578	1.55535	1.55948	1.62424	1.57969	0.984863
64261	SeMNPV_Til_64261	1.8175	1.92506	1.75011	1.83089	1.6016	1.92357	1.76069	1.76195	1.03912
64321	SeMNPV_Til_64321	1.47062	1.47275	1.51984	1.48774	1.42576	1.53346	1.45954	1.47292	1.01006
64381	SeMNPV_Til_64381	1.75215	2.14645	1.61235	1.83698	1.60924	2.21985	1.66112	1.83007	1.00378
64441	SeMNPV_Til_64441	5.22569	4.1682	5.27726	4.89038	4.97029	5.3205	4.8342	5.04166	0.969994
64501	SeMNPV_Til_64501	1.78519	1.53416	1.53022	1.61652	2.97004	2.78416	2.54727	2.76716	0.584182
64561	SeMNPV_Til_64561	1.46124	1.45971	1.41421	1.44505	1.47156	1.43196	1.45223	1.45192	0.99527
64621	SeMNPV_Til_64621	1.57482	1.4439	1.58929	1.536	1.59804	1.48542	1.44847	1.51064	1.01679
64681	SeMNPV_Til_64681	1.53429	1.53833	1.62962	1.56741	2.52249	1.78589	1.45272	1.92037	0.816204
64741	SeMNPV_Til_64741	2.49964	2.08584	1.67639	2.08729	2.43928	1.97322	1.41249	1.94166	1.075
64801	SeMNPV_Til_64801	1.67639	1.74594	1.70881	1.71038	1.48472	2.18001	1.45887	1.70787	1.00147
64861	SeMNPV_Til_64861	4.21734	2.0916	1.6528	2.65391	1.46914	1.69918	1.90347	1.6906	1.56981
64921	SeMNPV_Til_64921	1.49431	2.00762	1.5156	1.67251	1.44286	1.52162	1.47848	1.48098	1.12933
64981	SeMNPV_Til_64981	1.42255	1.43769	1.44312	1.43445	1.41608	1.46739	2.2672	1.71689	0.835495
65041	SeMNPV_Til_65041	1.46038	1.37944	1.43931	1.42637	1.48296	1.30482	1.32099	1.36959	1.04146
65101	SeMNPV_Til_65101	1.46739	1.51424	1.4383	1.47331	1.43064	1.75115	1.45627	1.54602	0.95297
65161	SeMNPV_Til_65161	1.52615	1.53494	1.49469	1.51859	1.53478	1.45703	1.46693	1.48625	1.02176
65221	SeMNPV_Til_65221	1.46727	1.50499	1.48251	1.48492	1.46435	1.53292	1.60247	1.53324	0.968484
65281	SeMNPV_Til_65281	1.61292	2.85273	2.79476	2.42014	2.37352	2.58227	2.38587	2.44722	0.988933
65341	SeMNPV_Til_65341	1.72989	1.83001	1.68175	1.74722	1.76372	2.53459	2.30877	2.20236	0.793338
65401	SeMNPV_Til_65401	1.34463	1.35337	1.56408	1.42069	1.30932	1.52072	1.33347	1.38783	1.02368
65461	SeMNPV_Til_65461	1.5257	1.50608	1.48016	1.50398	1.49537	1.51836	1.53375	1.51583	0.992186
65521	SeMNPV_Til_65521	1.77773	1.37744	1.92411	1.69309	1.69909	1.411	1.44125	1.51711	1.116
65581	SeMNPV_Til_65581	2.15191	1.52445	2.1455	1.94062	1.70881	1.55586	2.57843	1.9477	0.996365
65641	SeMNPV_Til_65641	1.35901	1.38864	1.46118	1.40294	1.35776	1.45606	1.39078	1.40153	1.00101
65701	SeMNPV_Til_65701	1.49067	1.51725	1.49515	1.50102	1.44404	1.53058	1.52556	1.50006	1.00064
65761	SeMNPV_Til_65761	1.43009	1.4321	1.40656	1.42292	2.67746	2.16928	1.63946	2.16207	0.658128
65821	SeMNPV_Til_65821	1.50706	1.50323	1.45727	1.48919	1.4991	1.49245	1.52701	1.50619	0.988713
65881	SeMNPV_Til_65881	1.67645	1.75003	1.63017	1.68555	1.60082	1.75709	1.72198	1.69329	0.995427
65941	SeMNPV_Til_65941	3.31791	3.04959	2.46534	2.94428	3.11863	3.44997	2.02264	2.86375	1.02812
66001	SeMNPV_Til_66001	1.29948	1.30053	1.53311	1.37771	1.56385	1.45149	1.2682	1.42785	0.964885
66061	SeMNPV_Til_66061	1.39411	1.4298	1.41451	1.41281	1.41313	1.448	1.50202	1.45439	0.971412
66121	SeMNPV_Til_66121	1.3619	2.63853	1.4441	1.81484	1.66459	1.47006	1.41292	1.51586	1.19724
66181	SeMNPV_Til_66181	5.80032	5.36589	5.53073	5.56565	5.23342	5.79539	5.64536	5.55806	1.00137
66241	SeMNPV_Til_66241	4.50827	3.46573	3.56878	3.8476	3.5881	3.66847	3.91067	3.72241	1.03363
66301	SeMNPV_Til_66301	2.26102	1.43974	1.45204	1.7176	1.4973	3.86218	1.43156	2.26368	0.758766
66361	SeMNPV_Til_66361	1.56716	2.29034	1.51991	1.79247	2.82363	1.56933	1.61009	2.00102	0.895778
66421	SeMNPV_Til_66421	4.01824	3.02561	2.26481	3.10289	1.98638	4.1531	2.40839	2.84929	1.089
66481	SeMNPV_Til_66481	1.47523	1.42034	1.43757	1.44438	1.50635	1.37211	1.38783	1.4221	1.01567
66541	SeMNPV_Til_66541	1.6469	1.4682	1.68266	1.59925	1.64274	1.50605	1.50224	1.55034	1.03155
66601	SeMNPV_Til_66601	1.52895	1.52386	1.48231	1.5117	1.51405	1.51432	1.82831	1.61889	0.933788
66661	SeMNPV_Til_66661	1.35353	1.39614	1.45946	1.40305	1.64022	1.48109	1.38876	1.50336	0.933275
66721	SeMNPV_Til_66721	2.5976	1.44439	1.38332	1.80844	1.40747	1.42798	2.15111	1.66219	1.08799
66781	SeMNPV_Til_66781	1.61233	1.56844	1.61745	1.59941	1.89523	1.56385	1.5426	1.66723	0.959322
66841	SeMNPV_Til_66841	1.44651	1.36554	2.36306	1.72504	1.4845	2.77938	1.34884	1.87091	0.922033
66901	SeMNPV_Til_66901	2.93174	1.96818	1.4554	2.11844	2.90984	1.49675	1.87995	2.09551	1.01094
66961	SeMNPV_Til_66961	1.4187	1.46522	2.20737	1.6971	1.81664	1.43655	1.53713	1.59677	1.06283
67021	SeMNPV_Til_67021	1.53457	1.45956	1.53928	1.51114	1.56851	1.48427	1.45294	1.5019	1.00615
67081	SeMNPV_Til_67081	1.46125	1.47651	1.4185	1.45209	1.45064	2.13903	1.53906	1.70958	0.849384
67141	SeMNPV_Til_67141	1.90491	1.34237	1.4321	1.55979	1.92591	3.12715	2.75677	2.60328	0.599166
67201	SeMNPV_Til_67201	1.59713	1.62229	1.69359	1.63767	1.42022	2.03051	1.44521	1.63198	1.00349
67261	SeMNPV_Til_67261	1.59105	1.65783	1.58947	1.61278	1.47444	1.7282	1.51551	1.57271	1.02548
67321	SeMNPV_Til_67321	1.37131	1.43235	2.74175	1.84847	1.36504	1.40014	4.30678	2.35732	0.784141
67381	SeMNPV_Til_67381	1.45724	1.46387	1.41106	1.44406	1.44564	1.45143	1.46142	1.45283	0.993961
67441	SeMNPV_Til_67441	2.31436	1.87001	1.45918	1.88118	1.40371	2.98656	1.45642	1.9489	0.965254
67501	SeMNPV_Til_67501	1.49274	1.5473	1.46859	1.50287	1.44703	1.51673	1.46349	1.47575	1.01838
67561	SeMNPV_Til_67561	4.20906	3.63704	3.84887	3.89833	4.22822	4.61086	3.80173	4.21361	0.925176
67621	SeMNPV_Til_67621	1.44224	1.40812	1.62236	1.49091	2.3939	1.68529	2.11834	2.06584	0.721693
67681	SeMNPV_Til_67681	1.6297	2.41221	1.55186	1.86459	1.565	1.58511	1.61939	1.58983	1.17282
67741	SeMNPV_Til_67741	1.66001	1.40994	2.62667	1.89887	2.40003	1.37768	1.87211	1.88328	1.00828
67801	SeMNPV_Til_67801	1.35543	1.63915	1.44606	1.48021	1.35908	1.45462	1.39741	1.40371	1.0545
67861	SeMNPV_Til_67861	1.5	1.55854	1.47752	1.51202	1.66704	1.52826	1.48729	1.56086	0.968708
67921	SeMNPV_Til_67921	3.63878	1.59424	2.48138	2.57147	3.08804	2.98089	3.3458	3.13824	0.819397
67981	SeMNPV_Til_67981	1.48447	1.43	1.47786	1.46411	1.52517	1.4448	1.42308	1.46435	0.999836
68041	SeMNPV_Til_68041	1.47686	1.52453	1.44917	1.48352	1.43409	1.50435	1.48152	1.47332	1.00692
68101	SeMNPV_Til_68101	1.41687	1.39178	1.61504	1.47456	1.44556	1.65379	1.74065	1.61333	0.913985
68161	SeMNPV_Til_68161	1.40088	1.45559	4.16272	2.33973	1.38026	1.42143	2.86489	1.88886	1.2387
68221	SeMNPV_Til_68221	1.49393	1.48907	1.44603	1.47634	1.47234	1.4901	1.50247	1.4883	0.991963
68281	SeMNPV_Til_68281	1.51149	1.48542	1.47707	1.49133	1.53187	1.41202	2.13939	1.69442	0.880137
68341	SeMNPV_Til_68341	1.44499	1.47096	1.40817	1.44137	2.1605	1.45866	2.06768	1.89561	0.760372
68401	SeMNPV_Til_68401	1.81407	1.54618	1.52706	1.6291	1.53346	1.52989	1.52257	1.52864	1.06572
68461	SeMNPV_Til_68461	1.66186	1.73132	1.69	1.69439	1.48167	1.97239	1.46651	1.64019	1.03305
68521	SeMNPV_Til_68521	2.41995	1.48693	1.46006	1.78898	1.52989	1.4362	1.4418	1.4693	1.21758
68581	SeMNPV_Til_68581	1.43643	3.4117	1.69947	2.18253	1.80512	1.47932	2.20433	1.82959	1.19291
68641	SeMNPV_Til_68641	1.92421	1.82972	1.69779	1.81724	1.66231	1.73864	1.7842	1.72838	1.05141
68701	SeMNPV_Til_68701	2.31837	1.57901	1.78827	1.89522	1.65369	1.5944	1.57218	1.60676	1.17953
68761	SeMNPV_Til_68761	1.49957	1.49738	1.44992	1.48229	1.49605	1.48304	1.51631	1.49847	0.989204
68821	SeMNPV_Til_68821	1.43674	2.2958	3.34474	2.35909	2.06845	1.46936	2.97637	2.1714	1.08644
68881	SeMNPV_Til_68881	1.59868	1.64654	1.63738	1.62753	1.4577	1.85114	1.49845	1.60243	1.01566
68941	SeMNPV_Til_68941	1.32737	1.36714	1.46455	1.38635	1.32786	1.45369	1.35428	1.37861	1.00562
69001	SeMNPV_Til_69001	1.64992	1.63873	1.56584	1.61816	2.1953	1.63062	1.67979	1.83524	0.881721
69061	SeMNPV_Til_69061	1.4127	4.96535	1.37808	2.58538	1.42238	1.41757	1.42493	1.42163	1.8186
69121	SeMNPV_Til_69121	1.6274	1.70598	1.61926	1.65088	1.51146	1.73833	1.48532	1.57837	1.04594
69181	SeMNPV_Til_69181	2.7583	1.6329	1.60016	1.99712	1.61195	3.17727	1.6787	2.15597	0.926319
69241	SeMNPV_Til_69241	1.47732	1.48067	1.52469	1.49423	1.42899	1.54363	1.46557	1.4794	1.01002
69301	SeMNPV_Til_69301	1.50466	2.02191	2.58917	2.03858	1.50606	1.37653	1.75805	1.54688	1.31786
69361	SeMNPV_Til_69361	1.8806	1.73372	1.91646	1.84359	2.29613	1.82726	1.49526	1.87289	0.98436
69421	SeMNPV_Til_69421	1.7438	1.53279	1.82314	1.69991	1.67212	1.55621	1.56766	1.59866	1.06333
69481	SeMNPV_Til_69481	1.44744	1.48539	1.42806	1.45363	1.8238	3.14003	2.08974	2.35119	0.618252
69541	SeMNPV_Til_69541	1.53315	1.58231	1.54003	1.55183	1.45763	1.61759	1.53007	1.5351	1.0109
69601	SeMNPV_Til_69601	1.4245	1.42137	2.76228	1.86938	1.55439	1.51059	1.42146	1.49548	1.25002
69661	SeMNPV_Til_69661	1.43668	3.05355	1.39214	1.96079	1.43544	1.43189	1.44726	1.43819	1.36337
69721	SeMNPV_Til_69721	1.42392	1.39875	1.55506	1.45924	1.34884	1.54276	1.38352	1.42504	1.024
69781	SeMNPV_Til_69781	1.45718	1.42274	1.59612	1.49201	1.34691	1.63463	1.39425	1.45859	1.02291
69841	SeMNPV_Til_69841	2.2626	1.43814	1.35103	1.68392	1.40303	1.41712	1.47562	1.43192	1.17599
69901	SeMNPV_Til_69901	1.50416	1.49734	2.38792	1.79647	1.50204	1.38052	1.38917	1.42391	1.26164
69961	SeMNPV_Til_69961	1.82618	1.78302	1.87071	1.82664	1.57535	1.91874	1.46295	1.65235	1.10548
70021	SeMNPV_Til_70021	1.57855	4.48629	3.33792	3.13425	2.9656	1.50862	3.19005	2.55476	1.22683
70081	SeMNPV_Til_70081	2.3758	1.47719	1.46048	1.77115	1.4803	1.31116	1.4317	1.40772	1.25817
70141	SeMNPV_Til_70141	1.56534	1.61926	1.57433	1.58631	1.46266	1.68784	1.52454	1.55835	1.01794
70201	SeMNPV_Til_70201	1.5233	1.58465	1.51063	1.53953	1.47572	1.54728	1.47355	1.49885	1.02714
70261	SeMNPV_Til_70261	1.99857	1.67171	1.99747	1.88925	1.64723	1.74335	1.51577	1.63545	1.15519
70321	SeMNPV_Til_70321	1.49144	1.53705	1.47349	1.50066	1.44276	1.52257	1.517	1.49411	1.00438
70381	SeMNPV_Til_70381	1.52472	1.5629	1.51604	1.53455	1.50151	1.53568	1.48431	1.50717	1.01817
70441	SeMNPV_Til_70441	1.46772	1.49389	1.43572	1.46578	1.46818	1.48859	1.5982	1.51832	0.965394
70501	SeMNPV_Til_70501	1.41487	1.46407	1.3782	1.41905	1.3955	1.43172	3.06476	1.96399	0.722532
70561	SeMNPV_Til_70561	1.38048	1.4253	1.30053	1.36877	1.38101	1.40076	1.44176	1.40784	0.972246
70621	SeMNPV_Til_70621	1.42981	1.48028	1.39779	1.43596	1.40313	1.44963	1.4608	1.43786	0.998682
70681	SeMNPV_Til_70681	1.37332	1.41755	1.28936	1.36008	1.38459	1.38426	1.41686	1.39524	0.974799
70741	SeMNPV_Til_70741	1.79765	1.52696	1.87582	1.73348	1.68681	1.55301	1.57461	1.60481	1.08018
70801	SeMNPV_Til_70801	1.51153	1.51694	1.49035	1.50628	1.50817	1.41961	1.41133	1.44637	1.04142
70861	SeMNPV_Til_70861	3.36587	1.68818	5.29967	3.45124	2.58227	1.72775	1.53976	1.94992	1.76994
70921	SeMNPV_Til_70921	1.58194	1.61715	1.64576	1.61495	1.44098	1.8703	1.48103	1.59744	1.01096
70981	SeMNPV_Til_70981	1.5125	1.49585	1.50839	1.50558	1.53482	4.38846	1.47681	2.4667	0.610363
71041	SeMNPV_Til_71041	2.37049	2.59341	1.31352	2.09247	1.87798	2.89305	1.45772	2.07625	1.00781
71101	SeMNPV_Til_71101	1.50959	1.49842	1.48725	1.49842	1.51297	1.39986	1.39478	1.43587	1.04356
71161	SeMNPV_Til_71161	3.13222	4.2935	1.47939	2.96837	3.19129	2.20973	3.08743	2.82948	1.04909
71221	SeMNPV_Til_71221	1.45855	1.49098	1.43667	1.46207	1.46272	1.49041	1.60264	1.51859	0.962779
71281	SeMNPV_Til_71281	1.50987	1.57281	1.49054	1.5244	1.45312	1.5372	1.91069	1.63367	0.933114
71341	SeMNPV_Til_71341	1.47298	1.49885	1.47382	1.48189	1.66378	1.51071	1.52018	1.56489	0.946959
71401	SeMNPV_Til_71401	1.50529	1.49474	1.45718	1.48574	1.47834	1.50151	1.51522	1.49836	0.991578
71461	SeMNPV_Til_71461	1.41208	1.43116	1.35578	1.39968	1.40786	1.41483	1.43503	1.41924	0.986215
71521	SeMNPV_Til_71521	1.62746	2.6973	1.55074	1.9585	1.55099	1.58642	1.58585	1.57442	1.24395
71581	SeMNPV_Til_71581	2.20073	1.43883	1.3913	1.67695	3.40863	3.49253	1.42723	2.77613	0.60406
71641	SeMNPV_Til_71641	1.5951	1.53334	1.53162	1.55336	1.54555	1.56516	1.58526	1.56532	0.992355
71701	SeMNPV_Til_71701	1.43809	1.48707	1.4098	1.44499	1.41311	1.46282	1.47414	1.45002	0.996526
71761	SeMNPV_Til_71761	1.51242	1.59303	1.62409	1.57651	1.41502	2.15144	1.48695	1.68447	0.935908
71821	SeMNPV_Til_71821	1.56497	1.55896	1.51488	1.54627	1.5262	1.55429	1.59387	1.55812	0.992395
71881	SeMNPV_Til_71881	1.38282	1.41601	1.44365	1.41416	1.39268	1.47838	1.44412	1.43839	0.983152
71941	SeMNPV_Til_71941	1.49506	1.53879	1.50009	1.51131	1.49622	1.55365	1.62773	1.5592	0.969288
72001	SeMNPV_Til_72001	1.57148	1.64672	1.55327	1.59049	1.47924	1.6481	1.50052	1.54262	1.03103
72061	SeMNPV_Til_72061	1.446	2.10226	1.4173	1.65518	1.48279	1.34873	1.37341	1.40164	1.18089
72121	SeMNPV_Til_72121	1.43364	1.40658	1.40092	1.41371	4.28447	1.37523	1.40115	2.35362	0.600656
72181	SeMNPV_Til_72181	1.40892	1.60727	1.37037	1.46219	1.41623	1.42665	1.52463	1.45584	1.00436
72241	SeMNPV_Til_72241	1.46641	1.47033	1.41931	1.45202	1.44977	1.4652	1.47075	1.46191	0.993235
72301	SeMNPV_Til_72301	1.35878	1.40148	1.44854	1.40293	1.36138	1.47234	1.4054	1.41304	0.992847
72361	SeMNPV_Til_72361	1.7282	1.46244	1.8309	1.67385	1.68434	1.50411	1.52888	1.57244	1.06449
72421	SeMNPV_Til_72421	3.08925	1.57348	1.6249	2.09588	1.61698	1.59991	1.66832	1.6284	1.28707
72481	SeMNPV_Til_72481	4.17063	4.38939	3.85284	4.13762	4.44549	4.27173	3.50106	4.07276	1.01592
72541	SeMNPV_Til_72541	1.5153	2.63152	1.46739	1.8714	1.48986	1.5088	1.52618	1.50828	1.24075
72601	SeMNPV_Til_72601	1.47512	1.35798	1.48983	1.44098	1.51466	1.35419	1.34653	1.40513	1.02551
72661	SeMNPV_Til_72661	1.64217	1.67692	1.63964	1.65291	1.56023	1.6748	1.51554	1.58352	1.04382
72721	SeMNPV_Til_72721	1.41974	1.4557	1.38949	1.42164	3.03016	1.43026	1.43024	1.96355	0.724015
72781	SeMNPV_Til_72781	1.63824	1.72965	1.62503	1.66431	1.57901	1.77752	1.69965	1.68539	0.987488
72841	SeMNPV_Til_72841	1.43647	1.34163	1.43134	1.40314	1.46061	1.71445	1.28503	1.4867	0.943801
72901	SeMNPV_Til_72901	5.75348	5.55889	5.51859	5.61032	5.5063	6.29265	6.04246	5.94714	0.943365
72961	SeMNPV_Til_72961	1.46649	2.17598	2.57027	2.07092	1.48322	4.19105	1.69551	2.45659	0.843003
73021	SeMNPV_Til_73021	1.41694	3.2287	1.36775	2.00446	1.43307	1.40392	1.42715	1.42138	1.41022
73081	SeMNPV_Til_73081	1.40584	1.4277	1.42332	1.41895	1.40968	1.44771	1.47412	1.44383	0.982768
73141	SeMNPV_Til_73141	1.84722	1.80166	1.89696	1.84861	1.56532	4.21253	1.54278	2.44021	0.757563
73201	SeMNPV_Til_73201	1.52194	1.60711	1.6213	1.58345	1.43666	1.83633	1.5429	1.6053	0.986391
73261	SeMNPV_Til_73261	1.83001	1.90193	1.72541	1.81912	1.62162	1.87323	1.77025	1.75504	1.03651
73321	SeMNPV_Til_73321	1.47084	1.51562	1.44283	1.47643	1.43118	1.49731	1.48932	1.4726	1.0026
73381	SeMNPV_Til_73381	1.3764	1.42046	1.28337	1.36008	1.37852	1.39279	1.87815	1.54982	0.877574
73441	SeMNPV_Til_73441	1.39688	1.44361	2.62978	1.82342	1.4041	2.32384	2.81565	2.1812	0.835974
73501	SeMNPV_Til_73501	1.43924	2.7503	1.41942	1.86965	1.56159	1.35785	1.89131	1.60359	1.16592
73561	SeMNPV_Til_73561	1.45271	1.40863	1.41495	1.42543	1.48605	1.3709	1.39352	1.41682	1.00607
73621	SeMNPV_Til_73621	1.4049	1.44328	1.4016	1.41659	1.42031	3.2113	1.68042	2.10401	0.673283
73681	SeMNPV_Til_73681	1.54296	1.5676	1.53397	1.54818	1.53166	1.54465	1.50312	1.52647	1.01422
73741	SeMNPV_Til_73741	1.42996	1.47953	1.39929	1.43626	1.40649	1.44942	1.43926	1.43172	1.00317
73801	SeMNPV_Til_73801	1.7257	1.54143	2.47881	1.91531	1.58799	2.86899	1.6328	2.02993	0.943538
73861	SeMNPV_Til_73861	1.69049	2.48669	1.94238	2.03985	1.59033	2.67981	1.64296	1.97103	1.03492
73921	SeMNPV_Til_73921	3.19533	3.75059	3.34319	3.4297	2.88172	3.9906	3.73411	3.53548	0.970082
73981	SeMNPV_Til_73981	1.47676	1.51057	1.46513	1.48415	1.4822	1.51753	1.61991	1.53988	0.963811
74041	SeMNPV_Til_74041	1.61579	1.69283	1.61087	1.63983	1.48938	1.76247	1.49814	1.58333	1.03569
74101	SeMNPV_Til_74101	3.4124	1.95605	1.29211	2.22019	1.69155	1.3999	2.45283	1.84809	1.20134
74161	SeMNPV_Til_74161	3.64434	3.52474	2.93109	3.36672	3.29532	3.4543	2.78342	3.17768	1.05949
74221	SeMNPV_Til_74221	2.1829	3.19839	2.71291	2.69806	2.39422	1.42156	2.35843	2.05807	1.31097
74281	SeMNPV_Til_74281	1.39476	1.42031	1.42231	1.41246	1.40538	1.44583	1.4676	1.43961	0.981143
74341	SeMNPV_Til_74341	1.46453	1.48308	1.42412	1.45724	1.45795	1.47575	1.56314	1.49895	0.972177
74401	SeMNPV_Til_74401	1.5371	1.61245	1.52199	1.55718	1.46731	1.58145	1.48856	1.51244	1.02958
74461	SeMNPV_Til_74461	1.72345	1.38052	1.86516	1.65638	1.68888	1.42051	1.42589	1.51176	1.09566
74521	SeMNPV_Til_74521	1.99185	1.69927	1.99714	1.89609	1.62337	1.81685	1.47297	1.63773	1.15775
74581	SeMNPV_Til_74581	4.31175	3.70528	3.78688	3.93464	3.8231	4.08049	4.12744	4.01034	0.981123
74641	SeMNPV_Til_74641	1.4398	1.35793	1.43325	1.41033	1.47301	1.31512	1.32627	1.37147	1.02833
74701	SeMNPV_Til_74701	1.52346	1.58234	1.49762	1.53447	1.48922	2.68673	1.60403	1.92666	0.796441
74761	SeMNPV_Til_74761	2.53676	3.3626	3.05218	2.98385	1.57542	1.44346	2.97979	1.99956	1.49225
74821	SeMNPV_Til_74821	8.55087	9.09117	9.87971	9.17392	9.73154	9.53611	9.34877	9.53881	0.961747
74881	SeMNPV_Til_74881	1.84238	1.43797	2.45682	1.91239	1.70797	1.4858	1.53857	1.57745	1.21233
74941	SeMNPV_Til_74941	3.05704	2.18872	2.45719	2.56765	1.62837	1.4224	2.57027	1.87368	1.37038
75001	SeMNPV_Til_75001	1.42429	1.46739	1.40307	1.43159	1.41378	1.44514	1.50353	1.45415	0.984484
75061	SeMNPV_Til_75061	1.46741	2.00555	1.43763	1.63687	1.89342	1.49262	1.46276	1.61626	1.01275
75121	SeMNPV_Til_75121	1.41329	2.03266	1.40313	1.61636	1.89618	2.96845	1.51007	2.1249	0.760677
75181	SeMNPV_Til_75181	1.52637	1.52294	1.47914	1.50948	1.51649	1.50934	1.55123	1.52568	0.98938
75241	SeMNPV_Til_75241	2.22836	1.52174	1.54657	1.76556	1.54997	2.07664	1.57594	1.73418	1.01809
75301	SeMNPV_Til_75301	1.68373	1.45068	1.74932	1.62791	1.66732	1.49672	1.49961	1.55455	1.04719
75361	SeMNPV_Til_75361	1.54283	1.60543	1.52888	1.55905	2.64403	1.56938	1.48218	1.89853	0.821187
75421	SeMNPV_Til_75421	1.68466	1.5152	1.57758	1.59248	1.56557	1.58397	1.60719	1.58558	1.00435
75481	SeMNPV_Til_75481	2.40999	1.73759	2.44301	2.19686	2.68225	2.81806	3.04695	2.84909	0.771076
75541	SeMNPV_Til_75541	3.15359	1.49128	1.51208	2.05232	1.5419	2.62723	2.50128	2.22347	0.923025
75601	SeMNPV_Til_75601	1.52244	2.67406	3.38852	2.52834	2.69117	3.38816	3.86279	3.31404	0.762918
75661	SeMNPV_Til_75661	1.41792	1.45614	1.41399	1.42935	1.43141	1.46206	1.55175	1.48174	0.964641
75721	SeMNPV_Til_75721	1.79837	1.65472	1.63566	1.69625	1.63473	1.65131	1.70403	1.66335	1.01978
75781	SeMNPV_Til_75781	2.06705	1.46611	1.4465	1.65989	1.43512	1.49486	1.54747	1.49248	1.11216
75841	SeMNPV_Til_75841	1.46964	1.47217	1.42243	1.45475	1.45028	1.46943	1.47518	1.46496	0.993026
75901	SeMNPV_Til_75901	1.61284	1.68282	1.59185	1.62917	1.57289	1.71128	1.68983	1.658	0.982611
75961	SeMNPV_Til_75961	1.86353	1.79099	1.93296	1.86249	1.54796	2.06186	1.41231	1.67404	1.11257
76021	SeMNPV_Til_76021	1.4721	1.51369	1.44618	1.47733	1.44195	1.49362	1.45234	1.46264	1.01004
76081	SeMNPV_Til_76081	1.31056	1.3773	1.47962	1.38916	1.30736	1.47212	1.31288	1.36412	1.01836
76141	SeMNPV_Til_76141	1.41504	1.45204	1.41781	1.4283	1.42828	1.46471	1.65855	1.51718	0.941415
76201	SeMNPV_Til_76201	3.30406	2.63405	2.75708	2.8984	3.321	3.21532	3.48371	3.34001	0.86778
76261	SeMNPV_Til_76261	1.50729	1.49525	1.46022	1.48759	1.48011	1.50366	1.52196	1.50191	0.990463
76321	SeMNPV_Til_76321	1.40798	1.44854	1.37505	1.41052	1.41794	1.42906	2.85305	1.90002	0.742375
76381	SeMNPV_Til_76381	5.62501	5.59877	5.36255	5.52878	5.19964	6.06703	5.54711	5.60459	0.986472
76441	SeMNPV_Til_76441	1.33788	1.34552	1.5522	1.41187	1.31094	1.50448	1.32737	1.38093	1.0224
76501	SeMNPV_Til_76501	1.53906	1.56955	1.50359	1.5374	1.53552	1.49915	1.56442	1.53303	1.00285
76561	SeMNPV_Til_76561	1.50689	1.49235	1.46085	1.4867	1.52974	1.44437	1.45523	1.47645	1.00694
76621	SeMNPV_Til_76621	1.5605	1.59218	1.61555	1.58941	1.44221	1.76837	1.49499	1.56852	1.01331
76681	SeMNPV_Til_76681	1.51411	1.5	1.46723	1.49378	1.48835	1.50859	1.54084	1.51259	0.987562
76741	SeMNPV_Til_76741	1.63915	1.37611	1.71432	1.57653	1.64481	1.42057	1.44628	1.50389	1.0483
76801	SeMNPV_Til_76801	1.42163	1.41663	1.37813	1.40547	1.4441	1.39318	1.4174	1.41822	0.991005
76861	SeMNPV_Til_76861	1.52542	1.51007	1.47916	1.50489	1.49876	1.51744	1.53637	1.51752	0.991673
76921	SeMNPV_Til_76921	2.47183	1.62409	1.64051	1.91214	1.86815	1.62733	1.69427	1.72992	1.10534
76981	SeMNPV_Til_76981	1.81119	1.63233	2.05935	1.83429	1.63208	1.63451	1.69326	1.65328	1.10948
77041	SeMNPV_Til_77041	1.44828	1.46258	1.40557	1.43881	1.43668	1.45176	1.49147	1.45997	0.985506
77101	SeMNPV_Til_77101	1.52736	1.52484	1.48054	1.51091	1.51877	1.50939	1.5524	1.52685	0.989559
77161	SeMNPV_Til_77161	1.68681	1.8302	1.6719	1.72963	2.48564	1.86969	1.72022	2.02518	0.854064
77221	SeMNPV_Til_77221	1.47053	1.47631	1.42538	1.45741	1.45245	1.47392	1.51584	1.48074	0.984244
77281	SeMNPV_Til_77281	1.6187	1.69537	1.60644	1.64017	1.50966	1.71138	1.48728	1.56944	1.04507
77341	SeMNPV_Til_77341	1.38241	2.66769	2.7109	2.25367	1.59906	1.40786	1.46961	1.49218	1.51032
77401	SeMNPV_Til_77401	1.43581	1.40313	1.40593	1.41496	1.47201	1.36986	1.39485	1.41224	1.00192
77461	SeMNPV_Til_77461	1.45055	1.46031	1.42808	1.44631	1.46127	2.87739	1.44042	1.92636	0.750801
77521	SeMNPV_Til_77521	1.49064	1.45895	1.44819	1.46593	1.51802	1.41053	1.40761	1.44538	1.01421
77581	SeMNPV_Til_77581	1.52628	1.99857	1.48109	1.66865	2.51761	2.53594	1.53848	2.19734	0.759393
77641	SeMNPV_Til_77641	1.6622	1.74763	1.66144	1.69042	1.51629	1.8302	1.47514	1.60721	1.05177
77701	SeMNPV_Til_77701	1.49661	1.55549	1.47246	1.50818	1.85487	1.52358	1.4728	1.61708	0.932656
77761	SeMNPV_Til_77761	1.62104	1.51488	1.54784	1.56125	2.64315	1.59017	1.56808	1.9338	0.807352
77821	SeMNPV_Til_77821	1.4484	1.49581	1.4174	1.45387	1.42046	3.0764	1.44582	1.98089	0.733947
77881	SeMNPV_Til_77881	1.41442	2.56501	1.37083	1.78342	1.4173	1.42709	2.96897	1.93779	0.920338
77941	SeMNPV_Til_77941	4.15561	1.77461	3.61944	3.18322	3.56615	4.86802	3.99888	4.14435	0.768086
78001	SeMNPV_Til_78001	1.49453	1.40243	1.50006	1.46567	1.54581	1.42781	1.39921	1.45761	1.00553
78061	SeMNPV_Til_78061	6.18682	6.16305	5.91414	6.088	5.99436	6.2772	6.30432	6.19196	0.983211
78121	SeMNPV_Til_78121	1.388	1.51947	1.31637	1.40795	1.39277	1.39856	1.4246	1.40531	1.00188
78181	SeMNPV_Til_78181	1.49381	1.47823	1.44766	1.47323	1.51592	1.43436	1.44472	1.465	1.00562
78241	SeMNPV_Til_78241	1.63258	1.69309	1.62659	1.65075	1.54368	1.69594	1.49632	1.57864	1.04568
78301	SeMNPV_Til_78301	1.38143	3.29127	1.30916	1.99395	2.1305	1.40467	2.57165	2.03561	0.979537
78361	SeMNPV_Til_78361	1.67432	1.62475	1.57659	1.62522	1.55043	1.60722	1.97844	1.71203	0.949294
78421	SeMNPV_Til_78421	1.59054	1.53906	1.59135	1.57365	1.58508	1.54174	1.53362	1.55348	1.01298
78481	SeMNPV_Til_78481	1.47232	1.47539	1.42673	1.45815	1.45228	1.47472	1.50213	1.47638	0.987654
78541	SeMNPV_Til_78541	1.49474	1.55232	2.59523	1.88076	1.44365	1.52109	1.47335	1.47936	1.27133
78601	SeMNPV_Til_78601	1.93091	1.67891	1.67069	1.76017	1.66247	1.6505	1.74353	1.6855	1.0443
78661	SeMNPV_Til_78661	1.57914	1.46576	1.59129	1.5454	1.59808	1.49708	1.46974	1.52164	1.01562
78721	SeMNPV_Til_78721	1.50278	1.56066	1.48133	1.51492	1.86448	1.5273	1.46796	1.61991	0.935189
78781	SeMNPV_Til_78781	4.56644	4.21815	4.06069	4.28176	3.84597	5.3511	4.81352	4.6702	0.916826
78841	SeMNPV_Til_78841	2.67659	1.39994	1.4753	1.85061	2.12403	1.41697	2.13782	1.89294	0.977639
78901	SeMNPV_Til_78901	1.99168	1.86516	1.73222	1.86302	1.66408	1.75249	1.81407	1.74355	1.06853
78961	SeMNPV_Til_78961	1.49917	1.49022	1.45192	1.48043	1.47245	1.4964	1.51559	1.49481	0.990381
79021	SeMNPV_Til_79021	1.37431	1.97292	1.2924	1.54654	1.95151	1.39982	1.45378	1.6017	0.965562
79081	SeMNPV_Til_79081	3.65197	3.69578	3.82046	3.72274	3.29023	3.96125	3.78655	3.67934	1.01179
79141	SeMNPV_Til_79141	1.60924	1.64828	1.66971	1.64241	1.44635	1.95264	1.47256	1.62385	1.01143
79201	SeMNPV_Til_79201	1.54102	1.41008	1.55427	1.50179	1.5782	1.45727	1.41091	1.48213	1.01327
79261	SeMNPV_Til_79261	1.57869	2.62902	2.69117	2.29963	2.16256	1.57922	2.56589	2.10256	1.09373
79321	SeMNPV_Til_79321	1.45305	1.37161	1.43436	1.41968	1.47518	1.29592	1.31456	1.36189	1.04243
79381	SeMNPV_Til_79381	1.45231	1.38405	1.42528	1.42055	1.48511	1.33117	1.35781	1.39136	1.02097
79441	SeMNPV_Til_79441	1.46314	1.50916	1.43396	1.46875	1.99344	3.75747	1.80039	2.5171	0.583511
79501	SeMNPV_Til_79501	3.4613	2.65864	3.73339	3.28445	3.41307	3.92811	2.7916	3.3776	0.972421
79561	SeMNPV_Til_79561	1.5277	1.52936	1.48265	1.51324	1.53766	1.49082	1.54064	1.52304	0.993564
79621	SeMNPV_Til_79621	1.40108	1.43765	1.40798	1.41557	1.41815	1.44442	2.99466	1.95241	0.725036
79681	SeMNPV_Til_79681	1.53924	1.58371	1.52882	1.55059	1.51035	2.63405	1.54455	1.89632	0.817686
79741	SeMNPV_Til_79741	2.43009	1.41181	1.4546	1.7655	1.79222	2.78105	1.42953	2.00093	0.882339
79801	SeMNPV_Til_79801	1.38467	1.42309	1.66623	1.49133	1.38489	1.40094	2.9034	1.89641	0.786397
79861	SeMNPV_Til_79861	5.00731	4.60039	4.88624	4.83131	4.81107	5.12468	4.67551	4.87042	0.991971
79921	SeMNPV_Til_79921	4.31432	4.87237	4.53788	4.57486	4.57049	4.61793	5.94975	5.04606	0.90662
79981	SeMNPV_Til_79981	1.55311	1.55828	1.91768	1.67636	1.53183	1.53451	1.58955	1.55196	1.08015
80041	SeMNPV_Til_80041	1.47132	1.48044	1.54846	1.50007	1.47389	1.92895	1.46971	1.62418	0.923587
80101	SeMNPV_Til_80101	2.04985	1.70159	1.69395	1.81513	1.67798	1.64057	2.07556	1.79804	1.00951
80161	SeMNPV_Til_80161	1.5325	1.53701	1.48676	1.51876	1.53127	1.50782	1.55872	1.5326	0.990967
80221	SeMNPV_Til_80221	2.53335	3.32398	3.30899	3.05544	3.73055	4.07918	2.05046	3.28673	0.929629
80281	SeMNPV_Til_80281	1.39255	4.70854	1.51566	2.53892	2.01735	1.4931	1.38274	1.63106	1.5566
80341	SeMNPV_Til_80341	1.45326	2.06537	1.40737	1.642	2.19832	1.43136	1.45115	1.69361	0.969526
80401	SeMNPV_Til_80401	1.31563	2.69548	1.50905	1.84005	1.32576	1.44322	1.30756	1.35885	1.35413
80461	SeMNPV_Til_80461	1.42648	1.39799	1.5856	1.47002	1.79512	1.59684	1.80882	1.73359	0.847963
80521	SeMNPV_Til_80521	1.45001	2.54155	1.40627	1.79928	1.46797	1.41533	1.43373	1.43901	1.25036
80581	SeMNPV_Til_80581	1.78827	2.22289	1.56136	1.85751	1.94024	2.17918	1.51212	1.87718	0.98952
80641	SeMNPV_Til_80641	1.50867	1.49003	1.4653	1.488	1.53367	1.43535	1.4374	1.46881	1.01307
80701	SeMNPV_Til_80701	1.61538	1.63119	1.61108	1.61922	1.56442	1.62229	1.52863	1.57178	1.03018
80761	SeMNPV_Til_80761	1.83356	1.3665	1.97148	1.72385	1.71601	1.37317	1.44286	1.51068	1.14111
80821	SeMNPV_Til_80821	1.49564	1.5412	1.50549	1.51411	1.494	1.56098	1.62665	1.56054	0.970246
80881	SeMNPV_Til_80881	1.50172	1.34587	2.01827	1.62196	1.71889	1.35917	1.66502	1.58103	1.02589
80941	SeMNPV_Til_80941	1.88807	2.53401	1.40292	1.94167	2.44777	1.43728	1.96263	1.94923	0.996121
81001	SeMNPV_Til_81001	1.57901	3.19533	1.61764	2.13066	2.27392	1.80198	1.65455	1.91015	1.11544
81061	SeMNPV_Til_81061	2.19264	1.6567	2.68323	2.17753	1.64165	1.65042	1.71117	1.66774	1.30567
81121	SeMNPV_Til_81121	1.45934	1.48686	1.45499	1.46706	1.43329	1.49375	1.61707	1.5147	0.968548
81181	SeMNPV_Til_81181	1.97239	1.54572	1.99857	1.83889	2.67452	2.73091	1.57907	2.32817	0.789846
81241	SeMNPV_Til_81241	1.44382	1.49256	1.41288	1.44975	1.5556	3.26585	1.44756	2.08967	0.693772
81301	SeMNPV_Til_81301	1.5016	1.52993	3.54098	2.19084	1.44756	1.73751	3.01519	2.06675	1.06004
81361	SeMNPV_Til_81361	1.41263	3.03732	1.36317	1.93771	2.29064	2.41143	1.42116	2.04108	0.949354
81421	SeMNPV_Til_81421	1.46374	1.46505	1.41554	1.44811	1.4697	1.43873	1.45962	1.45602	0.99457
81481	SeMNPV_Til_81481	1.40386	1.44122	1.39609	1.41372	2.00079	2.96315	2.1728	2.37891	0.594273
81541	SeMNPV_Til_81541	3.6541	2.80001	2.67089	3.04167	3.55043	3.81967	4.01698	3.7957	0.801346
81601	SeMNPV_Til_81601	1.63326	2.13852	1.46349	1.74509	2.04732	2.11798	1.62027	1.92852	0.904884
81661	SeMNPV_Til_81661	4.76205	1.39692	3.76325	3.30741	1.97541	1.67518	1.87357	1.84139	1.79615
81721	SeMNPV_Til_81721	1.4864	1.46473	1.44188	1.46434	1.51185	1.42074	1.42404	1.45221	1.00835
81781	SeMNPV_Til_81781	1.58238	1.9711	1.57683	1.71011	1.56963	2.24841	1.53179	1.78327	0.95897
81841	SeMNPV_Til_81841	1.44944	1.48238	2.60074	1.84419	1.45389	1.47767	1.59054	1.50737	1.22345
81901	SeMNPV_Til_81901	1.48366	1.5256	1.46395	1.49107	1.96568	1.51365	1.51469	1.66467	0.895713
81961	SeMNPV_Til_81961	1.44564	1.495	1.41406	1.45157	1.58965	2.5997	1.45344	1.88093	0.771729
82021	SeMNPV_Til_82021	1.51264	1.55089	1.51693	1.52682	1.45137	1.84213	1.52981	1.60777	0.949651
82081	SeMNPV_Til_82081	1.64269	1.54781	1.55842	1.58297	1.56348	1.59222	1.61138	1.58903	0.996189
82141	SeMNPV_Til_82141	1.68704	1.79622	1.65212	1.71179	1.59752	1.81217	1.72648	1.71206	0.999845
82201	SeMNPV_Til_82201	1.46613	1.43114	1.42344	1.44023	1.4959	1.39355	1.40703	1.43216	1.00564
82261	SeMNPV_Til_82261	1.52141	1.50533	1.47459	1.50044	1.49321	1.51473	1.53112	1.51302	0.991686
82321	SeMNPV_Til_82321	1.65773	1.603	1.56888	1.60987	1.5878	1.61188	1.65332	1.61767	0.995178
82381	SeMNPV_Til_82381	1.46199	1.49605	1.44454	1.46753	1.46663	1.49845	1.60778	1.52429	0.962763
82441	SeMNPV_Til_82441	1.54531	1.61116	1.54205	1.56617	1.54467	1.63204	1.65803	1.61158	0.971825
82501	SeMNPV_Til_82501	1.37354	2.37006	1.30306	1.68222	1.37744	1.39833	1.90118	1.55898	1.07905
82561	SeMNPV_Til_82561	3.35193	3.18697	3.96879	3.50256	3.60896	3.4117	2.55514	3.19194	1.09732
82621	SeMNPV_Til_82621	1.53194	1.50805	1.48746	1.50915	1.50034	1.52299	1.54106	1.52147	0.991906
82681	SeMNPV_Til_82681	2.69858	1.81787	1.86815	2.1282	1.52908	3.14219	2.61771	2.42966	0.875925
82741	SeMNPV_Til_82741	2.92259	2.17092	1.64195	2.24515	3.42041	3.69961	3.62392	3.58131	0.626907
82801	SeMNPV_Til_82801	1.46574	1.47021	1.41902	1.45166	1.44656	1.46696	1.48158	1.46503	0.990869
82861	SeMNPV_Til_82861	1.81861	1.43303	1.539	1.59688	1.56917	2.70649	1.43177	1.90248	0.839368
82921	SeMNPV_Til_82921	1.53017	1.53308	1.61573	1.55966	1.53135	1.50385	1.55384	1.52968	1.0196
82981	SeMNPV_Til_82981	1.94063	1.86247	1.74406	1.84905	1.54618	2.01123	1.90038	1.81927	1.01637
83041	SeMNPV_Til_83041	2.96255	1.41992	1.67207	2.01818	2.27181	3.12818	1.60458	2.33486	0.86437
83101	SeMNPV_Til_83101	1.57947	3.01112	2.54473	2.37844	1.81399	1.42016	1.38567	1.53994	1.5445
83161	SeMNPV_Til_83161	1.49486	1.55244	1.47045	1.50592	1.44459	1.52079	1.4697	1.47836	1.01864
83221	SeMNPV_Til_83221	2.75807	1.99893	1.42429	2.06043	1.77384	1.44755	1.44081	1.55407	1.32583
83281	SeMNPV_Til_83281	1.33434	1.37789	1.46212	1.39145	1.33347	1.46655	1.36554	1.38852	1.00211
83341	SeMNPV_Til_83341	1.52068	1.52664	1.48187	1.50973	1.51506	1.52253	1.61723	1.5516	0.973013
83401	SeMNPV_Til_83401	1.93706	1.63665	1.95816	1.84396	1.66981	1.66995	1.55402	1.63126	1.13039
83461	SeMNPV_Til_83461	1.58983	1.58013	1.53181	1.56726	1.56224	1.57045	1.63932	1.59067	0.985282
83521	SeMNPV_Til_83521	1.43507	1.41202	1.41346	1.42018	1.46717	1.40895	1.41044	1.42885	0.993932
83581	SeMNPV_Til_83581	1.50635	1.50057	1.4608	1.48924	1.48761	1.50437	1.55803	1.51667	0.981914
83641	SeMNPV_Til_83641	1.67918	1.60841	1.57991	1.6225	1.59527	1.61933	1.65914	1.62458	0.998719
83701	SeMNPV_Til_83701	1.44984	1.39181	1.41978	1.42048	1.57236	1.34667	1.37127	1.4301	0.993272
83761	SeMNPV_Til_83761	1.72267	1.72005	1.62854	1.69042	1.62461	1.69787	1.7258	1.68276	1.00455
83821	SeMNPV_Til_83821	1.36399	1.42659	2.51296	1.76785	1.36326	3.17082	1.94578	2.15995	0.818466
83881	SeMNPV_Til_83881	1.49678	1.35866	1.51996	1.45847	1.77159	1.36565	1.35236	1.49653	0.974564
83941	SeMNPV_Til_83941	1.49245	1.54811	1.4677	1.50275	1.44143	1.52024	1.48628	1.48265	1.01356
84001	SeMNPV_Til_84001	1.5149	1.57148	1.52612	1.5375	1.50797	1.60546	1.63569	1.58304	0.971234
84061	SeMNPV_Til_84061	3.5444	2.11534	3.53644	3.06539	1.44646	2.65928	3.14079	2.41551	1.26904
84121	SeMNPV_Til_84121	4.08256	4.31768	3.73676	4.04567	4.20552	4.21777	4.25126	4.22485	0.957587
84181	SeMNPV_Til_84181	1.48531	1.48501	1.43683	1.46905	1.48509	1.46813	1.49316	1.48213	0.991178
84241	SeMNPV_Til_84241	1.38663	1.41949	4.13952	2.31521	1.39641	1.39467	1.4225	1.40452	1.6484
84301	SeMNPV_Til_84301	1.67985	1.7141	1.67979	1.69124	1.56335	1.73919	1.50596	1.60283	1.05516
84361	SeMNPV_Til_84361	1.55271	1.56504	1.54455	1.5541	1.54865	1.54592	1.51386	1.53614	1.01169
84421	SeMNPV_Til_84421	1.43629	1.47429	1.41172	1.44077	1.43146	1.45121	1.63071	1.50446	0.957662
84481	SeMNPV_Til_84481	1.97148	1.34673	3.80018	2.3728	1.46367	1.28064	1.29418	1.34616	1.76264
84541	SeMNPV_Til_84541	1.40656	1.44622	1.36688	1.40656	1.41396	1.42417	1.51981	1.45265	0.968271
84601	SeMNPV_Til_84601	1.58392	1.60772	1.53643	1.57602	1.56678	1.59493	2.2917	1.8178	0.866992
84661	SeMNPV_Til_84661	2.66288	1.3301	1.51836	1.83711	1.52592	1.33821	1.71138	1.52517	1.20453
84721	SeMNPV_Til_84721	1.51066	1.57245	1.49169	1.52494	1.45554	1.53686	1.47239	1.48826	1.02464
84781	SeMNPV_Til_84781	1.53065	1.58567	1.50226	1.53953	1.49818	2.25301	1.60699	1.78606	0.861969
84841	SeMNPV_Til_84841	1.68638	1.52028	1.48829	1.56498	2.4641	1.45741	3.09932	2.34028	0.668717
84901	SeMNPV_Til_84901	1.47474	1.50265	1.44707	1.47482	1.4779	1.50062	1.61235	1.53029	0.963751
84961	SeMNPV_Til_84961	2.82437	1.33094	1.66177	1.93902	1.6057	1.3596	1.35833	1.44121	1.34542
85021	SeMNPV_Til_85021	1.40895	1.41597	1.36114	1.39535	1.43016	1.3913	1.41824	1.41323	0.98735
85081	SeMNPV_Til_85081	1.47939	1.49684	1.44122	1.47248	1.47429	1.49128	2.23102	1.7322	0.850067
85141	SeMNPV_Til_85141	1.50767	1.50372	1.45831	1.4899	1.49814	1.49413	1.52794	1.50674	0.988825
85201	SeMNPV_Til_85201	1.37516	1.41346	1.48869	1.42577	1.35529	1.52035	1.3946	1.42341	1.00165
85261	SeMNPV_Til_85261	1.32468	1.36835	1.46919	1.38741	1.32132	1.4664	1.34673	1.37815	1.00672
85321	SeMNPV_Til_85321	3.25333	1.3787	1.61377	2.08193	1.82932	1.64247	3.24753	2.23977	0.929529
85381	SeMNPV_Til_85381	1.67583	1.53557	1.70358	1.63833	1.64036	1.55327	1.55459	1.58274	1.03512
85441	SeMNPV_Til_85441	1.39925	1.43371	1.51708	1.45001	2.0091	1.56209	1.38906	1.65342	0.876981
85501	SeMNPV_Til_85501	1.48096	1.47223	1.55772	1.50364	1.40857	1.59292	1.71493	1.57214	0.956426
85561	SeMNPV_Til_85561	1.42292	1.4662	1.40103	1.43005	1.41287	2.34638	1.50307	1.7541	0.81526
85621	SeMNPV_Til_85621	1.40959	1.44817	1.40189	1.41988	1.42375	1.4443	1.54111	1.46972	0.96609
85681	SeMNPV_Til_85681	1.42095	1.41298	1.38177	1.40523	1.44736	1.38301	2.43244	1.75427	0.801035
85741	SeMNPV_Til_85741	1.33454	1.35878	1.49857	1.3973	1.32796	1.45437	1.34552	1.37595	1.01551
85801	SeMNPV_Til_85801	1.52761	1.54937	1.52141	1.5328	1.51951	1.52971	1.49504	1.51475	1.01191
85861	SeMNPV_Til_85861	1.39568	1.42959	1.49696	1.44074	1.3596	1.53238	1.40236	1.43145	1.00649
85921	SeMNPV_Til_85921	1.70749	1.72521	1.62598	1.68623	1.61949	1.70769	1.72488	1.68402	1.00131
85981	SeMNPV_Til_85981	1.41138	1.46236	1.36925	1.41433	1.38655	1.42862	1.43656	1.41724	0.997944
86041	SeMNPV_Til_86041	1.55372	1.58305	1.51315	1.54997	1.51352	1.54483	1.61511	1.55782	0.994965
86101	SeMNPV_Til_86101	1.72122	1.80057	1.75754	1.75977	1.51518	1.9995	1.44904	1.65457	1.06358
86161	SeMNPV_Til_86161	2.46745	1.45568	1.55232	1.82515	1.57742	3.17976	1.45152	2.06957	0.8819
86221	SeMNPV_Til_86221	1.39382	1.41879	1.34642	1.38634	1.41587	1.39509	1.41712	1.40936	0.983669
86281	SeMNPV_Til_86281	3.42227	3.65677	2.89095	3.32333	4.31079	2.7906	1.47254	2.85798	1.16283
86341	SeMNPV_Til_86341	1.51125	1.57284	1.49356	1.52588	1.45049	1.54368	1.49885	1.49767	1.01884
86401	SeMNPV_Til_86401	7.08213	7.4891	8.46761	7.67961	8.03919	8.19569	7.91128	8.04872	0.954141
86461	SeMNPV_Til_86461	2.83438	1.47523	1.45061	1.92007	2.30746	2.63624	1.5654	2.1697	0.884947
86521	SeMNPV_Til_86521	1.41396	1.44267	2.36793	1.74152	1.41501	1.44492	1.50117	1.4537	1.19799
86581	SeMNPV_Til_86581	1.39708	2.20311	1.41993	1.67337	1.41458	1.45874	1.50282	1.45871	1.14716
86641	SeMNPV_Til_86641	1.41806	1.42988	1.36683	1.40492	1.42798	1.41088	1.43168	1.42351	0.986943
86701	SeMNPV_Til_86701	3.5033	3.05851	3.0728	3.21154	3.30713	1.45551	2.23565	2.33276	1.37671
86761	SeMNPV_Til_86761	1.54157	1.5559	1.49814	1.53187	1.54162	1.5085	1.5713	1.54048	0.994412
86821	SeMNPV_Til_86821	7.2242	7.28728	7.78205	7.43118	7.45751	7.88508	7.48857	7.61039	0.976452
86881	SeMNPV_Til_86881	2.69923	1.66198	1.6221	1.99444	3.14415	2.44279	2.99295	2.85996	0.697364
86941	SeMNPV_Til_86941	1.45342	1.46624	1.41018	1.44328	1.44011	1.45793	1.55542	1.48449	0.972243
87001	SeMNPV_Til_87001	1.56236	1.62327	1.54555	1.57706	1.55537	1.63331	1.66801	1.61889	0.974158
87061	SeMNPV_Til_87061	1.46282	1.45805	1.41557	1.44548	1.47641	1.42864	1.44781	1.45095	0.996229
87121	SeMNPV_Til_87121	1.42176	1.45631	1.38477	1.42095	1.42662	1.43616	1.88533	1.58271	0.897795
87181	SeMNPV_Til_87181	1.49252	1.46009	1.86607	1.60623	1.52051	1.40935	1.40636	1.44541	1.11126
87241	SeMNPV_Til_87241	1.61845	2.08378	1.54579	1.74934	1.56802	1.58194	1.68935	1.6131	1.08446
87301	SeMNPV_Til_87301	1.45974	1.50571	1.4295	1.46498	1.42709	1.48352	1.45068	1.45376	1.00772
87361	SeMNPV_Til_87361	1.4384	1.46162	1.39912	1.43304	1.4344	1.4456	1.51313	1.46438	0.978604
87421	SeMNPV_Til_87421	2.53977	1.79385	1.86273	2.06545	3.11317	3.86862	3.26994	3.41724	0.60442
87481	SeMNPV_Til_87481	1.44271	1.40723	1.40819	1.41938	1.4754	1.37283	1.39732	1.41518	1.00296
87541	SeMNPV_Til_87541	1.33409	1.38044	1.47511	1.39654	1.32813	1.48793	1.3592	1.39175	1.00344
87601	SeMNPV_Til_87601	1.86583	1.64598	1.6505	1.72077	1.64665	1.63787	1.71455	1.66636	1.03266
87661	SeMNPV_Til_87661	3.58008	2.10917	3.18408	2.95778	3.86517	2.62575	3.14557	3.21216	0.920805
87721	SeMNPV_Til_87721	1.64834	1.51418	1.48902	1.55051	1.5366	1.43806	1.43669	1.47045	1.05445
87781	SeMNPV_Til_87781	1.49852	1.53599	2.32115	1.78522	1.83548	1.53676	1.5278	1.63335	1.09298
87841	SeMNPV_Til_87841	1.63972	2.34494	1.90366	1.96277	2.80514	3.71401	2.48276	3.00064	0.654119
87901	SeMNPV_Til_87901	1.62468	1.60318	1.55211	1.59332	1.57855	1.60062	1.65379	1.61099	0.989036
87961	SeMNPV_Til_87961	1.54653	1.51558	1.50025	1.52079	1.5077	1.53414	1.54558	1.52914	0.994539
88021	SeMNPV_Til_88021	1.45776	3.77465	1.42853	2.22031	1.43106	1.48003	1.4467	1.45259	1.52852
88081	SeMNPV_Til_88081	1.50931	1.54075	1.48509	1.51172	1.51372	1.53154	1.63254	1.55927	0.969508
88141	SeMNPV_Til_88141	1.58354	1.53752	1.52838	1.54981	1.50782	1.58631	2.26215	1.78543	0.868035
88201	SeMNPV_Til_88201	1.64828	1.66094	1.64899	1.65274	1.57143	1.65881	1.52941	1.58655	1.04172
88261	SeMNPV_Til_88261	1.50539	3.77179	1.48444	2.25388	1.44876	1.53349	1.48062	1.48762	1.51509
88321	SeMNPV_Til_88321	1.66961	2.05795	1.57056	1.76604	1.56275	1.59286	2.09502	1.75021	1.00905
88381	SeMNPV_Til_88381	1.40122	1.43962	1.40056	1.4138	1.41774	1.43924	1.52835	1.46178	0.967179
88441	SeMNPV_Til_88441	1.5867	1.53112	2.36694	1.82826	1.50713	1.58938	1.58609	1.56086	1.17131
88501	SeMNPV_Til_88501	1.5152	1.56704	1.50161	1.52795	1.47407	1.53438	1.47126	1.49324	1.02325
88561	SeMNPV_Til_88561	1.50282	1.46859	1.46475	1.47872	1.52832	1.40223	1.39715	1.44256	1.02506
88621	SeMNPV_Til_88621	1.49477	1.45233	1.45708	1.46806	1.5223	1.38116	1.39099	1.43148	1.02555
88681	SeMNPV_Til_88681	1.37008	1.42675	1.27441	1.35708	1.3733	1.3955	1.44646	1.40509	0.965834
88741	SeMNPV_Til_88741	1.53438	1.65259	1.50383	1.5636	2.07836	3.10584	1.58819	2.25746	0.692636
88801	SeMNPV_Til_88801	1.49128	1.36961	1.50816	1.45635	1.54001	1.37534	1.36341	1.42625	1.0211
88861	SeMNPV_Til_88861	1.46486	1.50364	1.50479	1.4911	1.45017	1.55847	1.57163	1.52676	0.976643
88921	SeMNPV_Til_88921	1.58145	1.65731	1.56174	1.60016	1.49159	1.65245	1.49052	1.54486	1.0358
88981	SeMNPV_Til_88981	1.61518	1.61798	1.55067	1.59461	1.5793	1.60909	1.66652	1.61831	0.985356
89041	SeMNPV_Til_89041	4.112	3.17255	3.80773	3.69743	2.59254	4.43474	3.57304	3.53344	1.04641
89101	SeMNPV_Til_89101	1.35465	1.40273	1.52589	1.42776	1.31739	1.56853	1.76601	1.55064	0.920753
89161	SeMNPV_Til_89161	1.59573	1.53435	1.53192	1.554	1.54641	1.56506	1.58703	1.56617	0.992232
89221	SeMNPV_Til_89221	1.51902	1.58963	1.50349	1.53738	1.45551	1.55529	1.49283	1.50121	1.0241
89281	SeMNPV_Til_89281	1.53052	1.40442	1.54391	1.49295	1.5711	1.44363	1.40458	1.4731	1.01347
89341	SeMNPV_Til_89341	1.56685	1.62818	1.56479	1.58661	1.46759	1.67219	1.52431	1.5547	1.02053
89401	SeMNPV_Til_89401	1.73088	1.84581	1.6022	1.72629	2.53527	1.60856	3.19306	2.44563	0.705869
89461	SeMNPV_Til_89461	1.45938	1.35514	1.4636	1.42604	1.49614	1.33724	1.33633	1.3899	1.026
89521	SeMNPV_Til_89521	1.36531	1.42763	1.24997	1.34764	1.36343	1.39211	1.42844	1.39466	0.966286
89581	SeMNPV_Til_89581	1.59306	1.64176	1.62449	1.61977	1.45971	1.81279	1.5062	1.5929	1.01687
89641	SeMNPV_Til_89641	2.24279	1.39971	2.07235	1.90495	1.4767	1.36431	2.74491	1.86197	1.02308
89701	SeMNPV_Til_89701	1.40206	1.44243	2.50089	1.78179	1.41025	1.43083	1.51523	1.45211	1.22704
89761	SeMNPV_Til_89761	1.47572	1.52333	1.56521	1.52142	2.7067	1.69	1.82277	2.07316	0.733867
89821	SeMNPV_Til_89821	5.37855	7.02287	7.93726	6.77956	8.01518	7.10452	8.10851	7.74274	0.875603
89881	SeMNPV_Til_89881	1.57836	1.66971	1.61225	1.62011	1.53342	1.78695	1.65646	1.65894	0.97659
89941	SeMNPV_Til_89941	1.44253	1.45297	1.47298	1.45616	1.4219	1.49235	1.46445	1.45957	0.997666
90001	SeMNPV_Til_90001	1.53213	1.50949	1.48801	1.50988	1.50419	1.52251	1.55265	1.52645	0.989144
90061	SeMNPV_Til_90061	1.38409	1.42953	1.3137	1.37577	1.38601	2.1305	1.45349	1.65667	0.830447
90121	SeMNPV_Til_90121	1.4268	1.40857	2.48048	1.77195	4.50209	1.38391	1.46027	2.44876	0.723613
90181	SeMNPV_Til_90181	1.86337	1.94819	1.79897	1.87018	1.58388	1.91646	1.76416	1.75483	1.06573
90241	SeMNPV_Til_90241	1.63336	1.67428	1.70216	1.66993	1.44659	2.04083	1.45468	1.64737	1.0137
90301	SeMNPV_Til_90301	1.54358	1.54815	1.4973	1.52968	1.53032	1.5238	1.57863	1.54425	0.990565
90361	SeMNPV_Til_90361	1.36002	1.40926	2.84296	1.87075	2.16835	1.58437	1.35255	1.70176	1.0993
90421	SeMNPV_Til_90421	1.82169	1.87343	1.70403	1.79971	1.6298	1.83209	1.76897	1.74362	1.03217
90481	SeMNPV_Til_90481	1.41464	1.44593	1.36759	1.40939	1.41435	1.42488	2.20875	1.68266	0.837597
90541	SeMNPV_Til_90541	1.42705	4.33507	1.40029	2.38747	1.42761	4.52467	1.43359	2.46196	0.969745
90601	SeMNPV_Til_90601	1.43906	1.40696	3.37387	2.0733	2.90647	1.63957	1.38392	1.97666	1.04889
90661	SeMNPV_Til_90661	1.61168	1.40299	1.65271	1.5558	1.62655	1.46027	1.41495	1.50059	1.03679
90721	SeMNPV_Til_90721	1.43631	2.9714	2.67981	2.36251	6.93107	1.26238	3.42093	3.87146	0.610236
90781	SeMNPV_Til_90781	1.42173	1.47141	1.38801	1.42705	1.39896	1.43916	1.43632	1.42481	1.00157
90841	SeMNPV_Til_90841	1.47865	1.52885	1.45039	1.48596	1.4352	1.50521	1.46899	1.4698	1.011
90901	SeMNPV_Til_90901	1.41883	1.43583	1.36737	1.40735	1.4132	1.42128	1.44135	1.42528	0.98742
90961	SeMNPV_Til_90961	1.85748	1.45859	1.9455	1.75386	1.7087	1.49819	1.55013	1.58567	1.10606
91021	SeMNPV_Til_91021	1.49248	1.43019	1.46917	1.46395	1.50507	1.34076	1.39031	1.41204	1.03676
91081	SeMNPV_Til_91081	1.56581	1.60563	1.60308	1.59151	1.45073	1.74594	1.50939	1.56869	1.01455
91141	SeMNPV_Til_91141	1.42935	1.47157	1.40898	1.43663	1.41641	1.45312	1.50505	1.45819	0.985213
91201	SeMNPV_Til_91201	1.39934	1.42108	1.54529	1.45524	1.40581	1.44798	1.46426	1.43935	1.01104
91261	SeMNPV_Til_91261	1.58431	1.66025	1.56917	1.60458	1.48158	1.67882	1.56494	1.57511	1.01871
91321	SeMNPV_Til_91321	1.51711	1.51464	1.47432	1.50203	1.50558	1.51503	1.5971	1.53924	0.975825
91381	SeMNPV_Til_91381	1.79414	1.74967	1.8455	1.79644	1.58903	1.82314	1.49785	1.63668	1.09761
91441	SeMNPV_Til_91441	1.47488	1.52068	1.55531	1.51696	1.41979	2.29449	1.73197	1.81542	0.835598
91501	SeMNPV_Til_91501	1.47665	1.48328	1.43303	1.46432	1.46083	1.48129	1.5393	1.49381	0.98026
91561	SeMNPV_Til_91561	1.41317	1.45261	1.39101	1.41893	1.42432	1.43816	1.54465	1.46904	0.965889
91621	SeMNPV_Til_91621	1.61472	1.63359	1.72551	1.65794	1.41523	5.71219	1.43145	2.85296	0.581131
91681	SeMNPV_Til_91681	1.56898	2.47155	1.51673	1.85242	1.86205	1.54672	1.59868	1.66915	1.1098
91741	SeMNPV_Til_91741	1.55535	1.58096	1.86683	1.66771	1.5308	3.08123	1.60539	2.07247	0.804697
91801	SeMNPV_Til_91801	1.45653	1.4806	2.21784	1.71832	1.43223	1.49352	1.51107	1.47894	1.16186
91861	SeMNPV_Til_91861	3.14485	1.47504	1.49544	2.03844	1.53012	1.48137	1.45958	1.49036	1.36775
91921	SeMNPV_Til_91921	1.51011	1.54657	1.49057	1.51575	1.49581	1.44354	1.46503	1.46813	1.03244
91981	SeMNPV_Til_91981	1.38673	1.43503	1.33347	1.38508	1.39385	1.41241	1.92819	1.57815	0.877657
92041	SeMNPV_Til_92041	1.49898	1.48415	1.4521	1.47841	1.52092	1.43996	1.45186	1.47091	1.0051
92101	SeMNPV_Til_92101	1.44437	1.46638	1.40412	1.43829	1.43844	1.80359	1.52461	1.58888	0.905223
92161	SeMNPV_Til_92161	1.90614	1.48064	1.96981	1.78553	1.71252	1.5127	1.56557	1.59693	1.1181
92221	SeMNPV_Til_92221	1.74957	1.7307	1.77646	1.75225	1.58572	2.04866	1.51301	1.7158	1.02124
92281	SeMNPV_Til_92281	1.51973	1.57599	2.89305	1.99626	2.80027	2.24449	2.16742	2.40406	0.830369
92341	SeMNPV_Til_92341	1.51877	1.58978	1.50285	1.53713	1.45692	1.55246	1.48382	1.49774	1.0263
92401	SeMNPV_Til_92401	1.59094	1.53681	1.52889	1.55222	1.54755	1.56095	1.59173	1.56674	0.990728
92461	SeMNPV_Til_92461	1.39614	1.4423	1.37021	1.40289	1.40929	1.42319	1.52141	1.4513	0.966643
92521	SeMNPV_Til_92521	1.46461	1.466	1.44514	1.45858	1.4785	3.00595	1.44534	1.9766	0.737926
92581	SeMNPV_Til_92581	1.30974	1.35734	1.48925	1.38544	1.30249	1.48621	2.52516	1.77129	0.782167
92641	SeMNPV_Til_92641	1.46908	1.40742	1.7035	1.52667	1.50049	1.35885	1.388	1.41578	1.07832
92701	SeMNPV_Til_92701	1.37973	1.42147	1.5475	1.44957	1.38092	1.39598	2.8753	1.88407	0.769381
92761	SeMNPV_Til_92761	1.54483	1.51772	1.49861	1.52039	1.50741	1.53358	1.54668	1.52922	0.99422
92821	SeMNPV_Til_92821	5.5132	5.46463	5.16335	5.38039	5.22093	5.45691	5.02901	5.23561	1.02765
92881	SeMNPV_Til_92881	1.72335	3.22741	1.90318	2.28465	3.26621	2.64015	2.9656	2.95732	0.772539
92941	SeMNPV_Til_92941	1.73101	1.3803	1.87232	1.66121	1.6907	1.41909	1.42881	1.51287	1.09805
93001	SeMNPV_Til_93001	1.55772	1.53089	1.50894	1.53252	1.51508	1.54633	1.56033	1.54058	0.994765
93061	SeMNPV_Til_93061	1.59027	1.58317	1.53224	1.56856	1.56343	1.57236	1.64191	1.59257	0.984924
93121	SeMNPV_Til_93121	1.52941	1.5114	1.5264	1.5224	1.55007	1.51326	1.49738	1.52024	1.00142
93181	SeMNPV_Til_93181	1.44786	2.07267	1.48086	1.66713	1.42339	1.49891	1.46492	1.4624	1.13999
93241	SeMNPV_Til_93241	3.49519	1.74622	1.98789	2.40977	2.9522	3.94792	2.739	3.21304	0.749995
93301	SeMNPV_Til_93301	2.27556	1.81664	1.43969	1.84396	1.42912	1.49453	5.08618	2.66995	0.690636
93361	SeMNPV_Til_93361	1.51911	1.50241	1.47313	1.49822	1.49233	1.51303	1.54092	1.51543	0.988643
93421	SeMNPV_Til_93421	3.26756	1.42159	1.23454	1.97456	1.36961	1.38673	1.43299	1.39644	1.414
93481	SeMNPV_Til_93481	3.21567	1.43467	1.39112	2.01382	1.4357	1.41867	3.39245	2.08227	0.967126
93541	SeMNPV_Til_93541	1.30789	1.3425	1.47487	1.37509	1.30789	1.44783	1.30974	1.35515	1.01471
93601	SeMNPV_Til_93601	1.37374	1.43271	1.29818	1.36821	1.37354	1.40182	1.45182	1.40906	0.971007
93661	SeMNPV_Til_93661	1.36762	1.42313	1.24523	1.34532	1.37003	1.3891	1.43674	1.39863	0.961889
93721	SeMNPV_Til_93721	1.59335	1.95465	1.58147	1.70982	2.77392	1.60892	1.51812	1.96699	0.869261
93781	SeMNPV_Til_93781	1.68744	1.69965	1.69275	1.69328	1.57438	1.71922	1.51984	1.60448	1.05534
93841	SeMNPV_Til_93841	1.55232	1.56012	1.50584	1.53943	1.53362	1.53133	1.59023	1.55173	0.992073
93901	SeMNPV_Til_93901	1.5916	1.64376	1.55791	1.59776	1.56981	1.64723	1.68031	1.63245	0.978747
93961	SeMNPV_Til_93961	1.53774	1.55444	1.49768	1.52995	1.63593	1.49469	1.55035	1.56032	0.980538
94021	SeMNPV_Til_94021	1.46764	1.46085	1.4202	1.44956	1.48427	1.42971	1.44811	1.45403	0.996929
94081	SeMNPV_Til_94081	2.48206	1.97127	2.557	2.33678	1.40933	1.39847	2.05062	1.61947	1.44292
94141	SeMNPV_Til_94141	2.07937	2.33067	1.41525	1.94177	1.91719	1.38189	1.99747	1.76552	1.09983
94201	SeMNPV_Til_94201	1.78908	1.41771	1.35419	1.52033	2.90739	2.47997	1.42082	2.26939	0.669926
94261	SeMNPV_Til_94261	1.50137	1.47875	1.48244	1.48752	1.50397	1.36591	1.37619	1.41536	1.05098
94321	SeMNPV_Til_94321	2.38836	1.65017	1.56413	1.86755	1.96899	1.64611	1.68524	1.76678	1.05704
94381	SeMNPV_Til_94381	1.41674	1.46419	1.38208	1.42101	1.40012	1.43305	1.91874	1.58397	0.897116
94441	SeMNPV_Til_94441	3.5195	2.31158	2.50467	2.77858	1.46955	3.00559	2.25803	2.24439	1.23801
94501	SeMNPV_Til_94501	3.66018	1.41813	1.30789	2.12873	2.24782	3.70878	1.82754	2.59471	0.820412
94561	SeMNPV_Til_94561	1.44346	1.36619	1.43346	1.41437	1.48023	1.33036	1.34733	1.38597	1.02049
94621	SeMNPV_Til_94621	1.65498	1.43634	2.73979	1.9437	1.39045	1.41198	4.36648	2.38964	0.813388
94681	SeMNPV_Til_94681	1.47303	1.40791	1.43949	1.44014	1.50325	1.35597	1.37279	1.41067	1.02089
94741	SeMNPV_Til_94741	4.75321	5.01598	4.73721	4.83547	4.36506	4.70983	3.94556	4.34015	1.11412
94801	SeMNPV_Til_94801	1.33511	1.38489	1.50978	1.40993	2.36064	2.29752	1.33272	1.99696	0.706037
94861	SeMNPV_Til_94861	1.67408	2.63354	1.74045	2.01602	1.66443	1.48036	1.46316	1.53599	1.31253
94921	SeMNPV_Til_94921	3.96162	4.02113	3.61206	3.86494	3.84373	4.56191	4.36615	4.25726	0.907845
94981	SeMNPV_Til_94981	1.48207	1.4112	1.45099	1.44809	1.50693	1.34726	1.36326	1.40582	1.03007
95041	SeMNPV_Til_95041	2.56884	1.58762	1.50862	1.88836	1.5198	2.88665	2.70845	2.37163	0.796229
95101	SeMNPV_Til_95101	1.78281	1.79837	1.87137	1.81752	1.50792	2.08974	1.41472	1.6708	1.08781
95161	SeMNPV_Til_95161	1.5695	1.66717	1.63529	1.62399	1.49437	1.86101	1.63105	1.66214	0.977045
95221	SeMNPV_Til_95221	1.47241	1.51023	1.48753	1.49005	1.46934	1.5379	1.60794	1.5384	0.968577
95281	SeMNPV_Til_95281	4.00015	4.23113	4.40163	4.21097	4.04085	2.8986	3.11406	3.35117	1.25657
95341	SeMNPV_Til_95341	1.64863	1.38096	1.72619	1.58526	1.65139	1.42821	1.4052	1.49493	1.06042
95401	SeMNPV_Til_95401	4.47785	1.55491	1.58019	2.53765	1.57965	1.60153	2.055	1.74539	1.45391
95461	SeMNPV_Til_95461	1.54269	1.54265	1.50174	1.52903	1.53665	1.53603	1.62155	1.56474	0.977173
95521	SeMNPV_Til_95521	1.411	1.44813	1.40972	1.42295	1.42503	3.78926	2.55179	2.58869	0.549678
95581	SeMNPV_Til_95581	1.37395	1.42203	1.30134	1.36577	1.38382	1.39082	1.41602	1.39689	0.977728
95641	SeMNPV_Til_95641	1.3603	1.37021	1.60326	1.44459	1.65106	1.61175	1.35173	1.53818	0.939157
95701	SeMNPV_Til_95701	1.69136	1.79393	1.6503	1.71186	1.60049	1.80232	1.72828	1.71037	1.00087
95761	SeMNPV_Til_95761	1.50897	1.4941	1.46344	1.48883	1.53203	1.44423	1.45398	1.47675	1.00818
95821	SeMNPV_Til_95821	1.87701	1.76516	1.91675	1.85297	1.58888	1.90595	1.46344	1.65276	1.12114
95881	SeMNPV_Til_95881	1.43605	1.33708	1.43589	1.40301	1.4637	1.28642	1.80085	1.51699	0.924862
95941	SeMNPV_Til_95941	1.5535	1.56192	1.50671	1.54071	1.53344	1.53318	1.59179	1.5528	0.992213
96001	SeMNPV_Til_96001	1.3828	1.30587	1.56629	1.41832	1.28762	1.50346	2.47249	1.75452	0.808379
96061	SeMNPV_Til_96061	1.88591	1.63909	1.92705	1.81735	1.66253	1.66662	1.55876	1.6293	1.11542
96121	SeMNPV_Til_96121	1.27205	1.26916	1.56833	1.36985	1.2682	1.49279	1.24175	1.33425	1.02668
96181	SeMNPV_Til_96181	2.44033	1.53413	1.57238	1.84895	1.36383	2.72541	2.87234	2.32053	0.79678
96241	SeMNPV_Til_96241	1.46214	1.4676	1.41509	1.44828	1.44888	1.45943	1.46627	1.45819	0.993201
96301	SeMNPV_Til_96301	2.26543	1.64503	1.60153	1.83733	1.55377	1.63359	2.9506	2.04599	0.898017
96361	SeMNPV_Til_96361	1.71922	1.79897	1.74594	1.75471	1.52342	1.97278	1.45326	1.64982	1.06358
96421	SeMNPV_Til_96421	1.6255	2.58562	1.67465	1.96192	2.61455	1.46691	1.41509	1.83218	1.07081
96481	SeMNPV_Til_96481	1.70571	1.42299	1.31678	1.48183	1.58397	2.34494	1.46744	1.79878	0.823794
96541	SeMNPV_Til_96541	1.49318	1.4919	1.44445	1.47651	1.97942	1.4802	1.50708	1.65557	0.891846
96601	SeMNPV_Til_96601	1.4252	1.44478	1.37852	1.41617	1.41819	1.42955	1.45663	1.43479	0.987021
96661	SeMNPV_Til_96661	1.51413	1.45441	1.51613	1.49489	1.55361	2.61959	1.44497	1.87273	0.798243
96721	SeMNPV_Til_96721	1.48663	1.42404	2.31969	1.74346	2.27697	1.36179	1.37465	1.67114	1.04327
96781	SeMNPV_Til_96781	1.38286	1.4227	1.30499	1.37019	1.84845	1.39921	1.43067	1.55944	0.878638
96841	SeMNPV_Til_96841	1.73815	1.77849	1.76069	1.75911	1.55944	1.87582	1.47219	1.63582	1.07537
96901	SeMNPV_Til_96901	1.47399	1.411	1.4649	1.44996	1.51407	1.42751	1.40795	1.44984	1.00008
96961	SeMNPV_Til_96961	3.40069	1.99775	3.09336	2.8306	4.31148	3.52682	3.12319	3.65383	0.774694
97021	SeMNPV_Til_97021	2.9042	2.84187	1.67147	2.47251	2.85368	3.21713	1.4441	2.50497	0.987044
97081	SeMNPV_Til_97081	1.40444	1.42553	2.94513	1.92503	1.40876	2.95697	1.42812	1.93128	0.996762
97141	SeMNPV_Til_97141	2.09786	1.60504	2.06969	1.92419	1.68711	1.64269	1.53686	1.62222	1.18615
97201	SeMNPV_Til_97201	1.35236	1.3955	1.46292	1.40359	1.34788	1.4844	1.38549	1.40592	0.998343
97261	SeMNPV_Til_97261	1.64785	1.70529	1.68646	1.67987	1.46881	1.98323	1.46845	1.64016	1.02421
97321	SeMNPV_Til_97321	1.54817	3.17341	1.50127	2.07428	2.51455	2.64157	1.63208	2.26274	0.916714
97381	SeMNPV_Til_97381	1.92819	1.62608	3.02002	2.19143	2.4613	1.61368	2.62667	2.23388	0.980997
97441	SeMNPV_Til_97441	2.52592	1.42143	1.37817	1.77517	1.43462	1.40597	1.41877	1.41979	1.25031
97501	SeMNPV_Til_97501	1.38778	1.42541	1.3397	1.3843	1.40236	1.40172	1.41829	1.40746	0.983544
97561	SeMNPV_Til_97561	1.53671	1.57739	1.50427	1.53946	1.88996	1.50174	1.57869	1.6568	0.929176
97621	SeMNPV_Til_97621	2.57333	2.25073	1.44554	2.08987	1.49297	1.43465	1.42405	1.45056	1.44073
97681	SeMNPV_Til_97681	1.4349	1.41502	1.41311	1.42101	1.46467	1.41356	1.6963	1.52484	0.931907
97741	SeMNPV_Til_97741	1.42622	1.3989	1.56557	1.46356	1.34523	1.55797	1.38249	1.42856	1.0245
97801	SeMNPV_Til_97801	1.44415	1.45131	1.39853	1.43133	1.44766	1.4295	1.44824	1.4418	0.992738
97861	SeMNPV_Til_97861	1.36565	1.42781	1.25657	1.35001	1.36362	1.39296	1.42734	1.39464	0.967998
97921	SeMNPV_Til_97921	2.07836	1.44445	2.09878	1.87386	1.73877	1.47953	1.55909	1.59246	1.17671
97981	SeMNPV_Til_97981	2.32506	1.54787	1.50206	1.79166	2.30623	1.55573	2.00079	1.95425	0.916803
98041	SeMNPV_Til_98041	1.43079	2.34048	1.40727	1.72618	1.44548	1.42844	1.43088	1.43493	1.20297
98101	SeMNPV_Til_98101	1.69326	1.67035	1.70502	1.68954	1.66214	2.23627	3.32839	2.40893	0.701365
98161	SeMNPV_Til_98161	1.68595	1.53675	1.57971	1.6008	1.57328	1.5959	1.61886	1.59601	1.003
98221	SeMNPV_Til_98221	1.4911	1.48877	1.44265	1.47417	1.47538	1.48384	1.50199	1.48707	0.991327
98281	SeMNPV_Til_98281	3.48457	1.43544	1.44025	2.12009	1.415	1.46455	1.47033	1.44996	1.46217
98341	SeMNPV_Til_98341	1.6191	1.68864	1.60703	1.63826	1.52208	1.69253	1.82523	1.67995	0.975184
98401	SeMNPV_Til_98401	1.43141	1.42694	1.38919	1.41585	1.45192	1.40436	1.42509	1.42712	0.9921
98461	SeMNPV_Til_98461	2.36793	1.56126	1.55668	1.82863	1.80492	1.59225	2.53249	1.97655	0.925159
98521	SeMNPV_Til_98521	1.59276	2.21384	1.53089	1.77916	2.50176	2.69331	1.56587	2.25365	0.78946
98581	SeMNPV_Til_98581	1.37903	1.43672	1.79872	1.53816	1.37063	1.40727	1.9711	1.583	0.97167
98641	SeMNPV_Til_98641	3.68794	2.18661	2.98469	2.95308	3.25267	3.33844	3.04959	3.21357	0.918941
98701	SeMNPV_Til_98701	1.62033	1.55728	1.54608	1.57457	3.02561	1.57898	1.61802	2.0742	0.759118
98761	SeMNPV_Til_98761	1.42839	1.43517	1.38165	1.41507	1.43902	1.41563	1.43641	1.43035	0.989317
98821	SeMNPV_Til_98821	1.95135	1.46472	1.4788	1.63162	2.20433	3.60492	1.36793	2.39239	0.682004
98881	SeMNPV_Til_98881	1.70091	1.78445	1.72049	1.73529	1.52296	1.93956	1.46028	1.64093	1.0575
98941	SeMNPV_Til_98941	2.88425	1.71455	1.32559	1.9748	1.56938	1.39415	1.43027	1.4646	1.34835
99001	SeMNPV_Til_99001	1.48898	1.5025	1.4734	1.48829	1.48781	1.49393	1.46592	1.48255	1.00387
99061	SeMNPV_Til_99061	1.58888	1.69479	1.6496	1.64442	1.50802	2.77339	1.64434	1.97525	0.832514
99121	SeMNPV_Til_99121	1.57953	1.49955	1.58285	1.55398	1.59023	1.51694	1.51187	1.53968	1.00928
99181	SeMNPV_Til_99181	1.44705	1.48131	1.42235	1.45024	1.45235	1.47686	1.59011	1.50644	0.962689
99241	SeMNPV_Til_99241	1.63387	1.79207	1.72218	1.71604	3.02308	2.54952	1.6505	2.4077	0.712731
99301	SeMNPV_Til_99301	1.37829	1.43816	1.30888	1.37511	1.3689	1.40688	1.43767	1.40448	0.979085
99361	SeMNPV_Til_99361	2.39129	2.74557	2.01004	2.3823	1.84722	1.51817	2.38314	1.91618	1.24325
99421	SeMNPV_Til_99421	3.25483	1.83434	1.67011	2.25309	3.03348	3.99853	2.38792	3.13998	0.71755
99481	SeMNPV_Til_99481	3.43485	2.48705	2.48276	2.80156	1.89661	1.74344	2.69756	2.11254	1.32616
99541	SeMNPV_Til_99541	1.52557	1.51738	1.64794	1.56363	1.37297	1.8445	1.43026	1.54924	1.00929
99601	SeMNPV_Til_99601	1.41216	1.43248	1.35611	1.40025	1.40425	3.25919	2.60912	2.42418	0.577617
99661	SeMNPV_Til_99661	1.97322	1.51693	1.45801	1.64939	1.43745	1.50799	2.97263	1.97269	0.836109
99721	SeMNPV_Til_99721	3.56897	3.66752	3.84566	3.69405	3.37799	4.26423	3.87795	3.84006	0.961978
99781	SeMNPV_Til_99781	1.5405	1.51904	1.49632	1.51862	1.51719	1.52819	1.85587	1.63375	0.92953
99841	SeMNPV_Til_99841	1.40696	1.43151	2.31664	1.71837	1.39893	1.41475	1.44276	1.41881	1.21113
99901	SeMNPV_Til_99901	1.60582	1.63521	1.68628	1.64244	2.32467	2.005	1.4559	1.92852	0.851656
99961	SeMNPV_Til_99961	1.87604	1.65567	1.57984	1.70385	1.59894	2.29034	1.68954	1.8596	0.916246
100021	SeMNPV_Til_100021	2.97481	2.72387	2.40751	2.70206	2.37546	4.69547	3.92679	3.66591	0.737079
100081	SeMNPV_Til_100081	1.41679	1.43443	1.36451	1.40524	1.412	1.41889	1.43866	1.42319	0.987392
100141	SeMNPV_Til_100141	1.64062	2.34157	1.69571	1.89263	1.64519	1.45878	1.424	1.50932	1.25396
100201	SeMNPV_Til_100201	1.71172	1.50739	1.76837	1.66249	1.66712	1.53599	1.914	1.70571	0.974666
100261	SeMNPV_Til_100261	1.43425	1.41647	1.3955	1.41541	1.46129	1.38906	1.41279	1.42105	0.996032
100321	SeMNPV_Til_100321	1.46385	1.46139	1.52051	1.48192	1.4199	1.52956	1.4461	1.46519	1.01142
100381	SeMNPV_Til_100381	3.38093	3.93037	3.82754	3.71294	3.84178	3.79365	3.66752	3.76765	0.98548
100441	SeMNPV_Til_100441	2.24051	2.43755	2.83491	2.50432	2.16352	1.44149	1.91112	1.83871	1.362
100501	SeMNPV_Til_100501	3.6623	2.62334	3.50167	3.26244	1.77487	2.65235	2.47111	2.29944	1.41879
100561	SeMNPV_Til_100561	1.56495	1.49686	1.56528	1.54236	1.58013	1.51262	1.50233	1.53169	1.00697
100621	SeMNPV_Til_100621	1.48922	5.41395	1.40846	2.77055	2.60179	1.41981	1.99523	2.00561	1.3814
100681	SeMNPV_Til_100681	3.32785	1.80232	1.84036	2.32351	2.56691	2.29396	2.65426	2.50504	0.927533
100741	SeMNPV_Til_100741	1.41949	1.4181	1.38917	1.40892	1.44315	1.40677	1.41575	1.42189	0.990877
100801	SeMNPV_Til_100801	1.57556	1.6503	1.55632	1.59406	1.49154	1.6399	1.48907	1.54017	1.03499
100861	SeMNPV_Til_100861	1.5624	1.63458	1.54332	1.5801	1.48714	1.61685	1.48552	1.52984	1.03285
100921	SeMNPV_Til_100921	1.44273	1.37488	1.42306	1.41356	1.47791	1.32796	1.35247	1.38612	1.0198
100981	SeMNPV_Til_100981	1.61975	1.63721	2.2527	1.83655	2.21606	2.09502	2.42855	2.24655	0.817501
101041	SeMNPV_Til_101041	1.53255	1.60408	1.51869	1.55177	1.47226	1.56631	1.47799	1.50552	1.03072
101101	SeMNPV_Til_101101	1.45851	1.45474	1.35642	1.42322	1.38346	1.42108	1.45419	1.41958	1.00257
101161	SeMNPV_Til_101161	1.4026	1.4335	1.34385	1.39332	1.39786	1.41485	1.45568	1.42279	0.979281
101221	SeMNPV_Til_101221	1.3217	1.37003	1.49201	1.39458	1.30888	1.49825	1.32087	1.376	1.01351
101281	SeMNPV_Til_101281	1.54481	1.61419	1.53367	1.56422	1.46451	1.61559	1.51941	1.53317	1.02025
101341	SeMNPV_Til_101341	1.4212	1.40046	1.53027	1.45065	1.35943	1.51545	1.39036	1.42175	1.02033
101401	SeMNPV_Til_101401	1.53571	1.54391	1.49096	1.52353	1.53879	1.50433	1.55892	1.53401	0.993165
101461	SeMNPV_Til_101461	4.28825	3.57586	3.98755	3.95055	4.14524	4.03299	3.95496	4.04439	0.976798
101521	SeMNPV_Til_101521	1.4228	1.46158	1.41965	1.43467	1.43542	1.46974	1.55863	1.48793	0.964206
101581	SeMNPV_Til_101581	1.55814	1.57869	1.51508	1.55064	1.51245	1.55337	1.61546	1.56043	0.993728
101641	SeMNPV_Til_101641	1.6377	1.53584	1.65498	1.60951	1.61864	1.54893	1.54653	1.57137	1.02427
101701	SeMNPV_Til_101701	1.80232	1.72232	1.85229	1.79231	1.60289	1.78253	1.51961	1.63501	1.09621
101761	SeMNPV_Til_101761	1.75892	1.52471	1.84145	1.70836	1.91568	1.55124	1.56823	1.67838	1.01786
101821	SeMNPV_Til_101821	1.39965	1.43716	1.40206	1.41296	1.41636	4.82527	3.79403	3.34522	0.42238
101881	SeMNPV_Til_101881	1.28177	1.28262	1.57666	1.38035	1.27223	1.51424	1.26131	1.34926	1.02304
101941	SeMNPV_Til_101941	1.43856	1.39893	1.41021	1.4159	1.62528	1.36362	1.38837	1.45909	0.970398
102001	SeMNPV_Til_102001	1.61957	1.68008	1.64236	1.64734	1.47116	1.86067	1.4968	1.60954	1.02348
102061	SeMNPV_Til_102061	2.90023	1.69266	1.90388	2.16559	2.30823	1.74763	1.70159	1.91915	1.12841
102121	SeMNPV_Til_102121	1.38809	1.44693	1.33409	1.3897	1.37348	1.41458	1.43568	1.40791	0.987065
102181	SeMNPV_Til_102181	1.37167	1.42743	1.28212	1.36041	1.37549	1.39721	1.44891	1.4072	0.966745
102241	SeMNPV_Til_102241	1.45398	1.48263	1.42115	1.45259	1.45492	1.47523	1.58591	1.50535	0.96495
102301	SeMNPV_Til_102301	1.90093	1.65089	1.65817	1.73666	1.65313	1.63543	1.72551	1.67136	1.03907
102361	SeMNPV_Til_102361	1.62886	1.52839	1.55161	1.56962	1.55191	1.58656	3.52952	2.22266	0.706189
102421	SeMNPV_Til_102421	1.45183	1.48538	1.42867	1.45529	1.45703	1.4832	1.59546	1.5119	0.96256
102481	SeMNPV_Til_102481	1.79971	2.28795	1.92941	2.00569	1.70248	3.04993	1.47272	2.07504	0.966578
102541	SeMNPV_Til_102541	1.57238	1.53766	1.519	1.54301	1.54404	1.54903	1.60049	1.56452	0.986253
102601	SeMNPV_Til_102601	1.53397	1.61238	1.56668	1.57101	1.50359	1.69191	1.63204	1.60918	0.976279
102661	SeMNPV_Til_102661	1.48069	1.5187	1.46277	1.48739	1.43898	1.51135	1.51852	1.48962	0.998503
102721	SeMNPV_Til_102721	3.95559	1.86217	3.8906	3.23612	3.6191	3.95496	4.10756	3.89387	0.831079
102781	SeMNPV_Til_102781	2.43216	1.36248	1.42864	1.74109	3.12625	3.24841	3.46867	3.28111	0.530642
102841	SeMNPV_Til_102841	5.61161	4.76515	5.09374	5.15684	5.21361	5.8703	6.12837	5.73743	0.898806
102901	SeMNPV_Til_102901	1.42422	1.46426	1.5279	1.47213	1.35928	2.20149	1.40172	1.65416	0.889953
102961	SeMNPV_Til_102961	3.04671	2.53791	3.57561	3.05341	2.99438	2.56541	1.93314	2.49764	1.22252
103021	SeMNPV_Til_103021	1.48229	1.40713	1.45487	1.4481	1.50304	1.33291	1.34983	1.39526	1.03787
103081	SeMNPV_Til_103081	1.34673	1.38837	1.45597	1.39702	1.56924	1.47056	1.38341	1.4744	0.947518
103141	SeMNPV_Til_103141	1.58548	2.57982	1.5287	1.898	1.51249	2.82549	1.99315	2.11037	0.899365
103201	SeMNPV_Til_103201	1.41046	1.44716	1.41146	1.42303	1.7178	1.45453	1.53867	1.57033	0.906195
103261	SeMNPV_Til_103261	1.58942	1.69375	1.64557	1.64291	1.92915	1.87798	1.64723	1.81812	0.903633
103321	SeMNPV_Til_103321	1.45701	1.47189	1.41402	1.44764	1.44535	1.46354	1.52566	1.47818	0.979337
103381	SeMNPV_Til_103381	1.54243	1.55515	1.49772	1.53177	1.5393	1.51331	1.57698	1.5432	0.992593
103441	SeMNPV_Til_103441	1.5112	1.49957	1.463	1.49126	1.48538	1.50569	1.52111	1.50406	0.991489
103501	SeMNPV_Til_103501	1.39698	1.42065	1.42393	1.41385	1.40545	1.44688	1.46583	1.43939	0.982258
103561	SeMNPV_Til_103561	1.43145	1.46748	1.40214	1.43369	1.43814	1.45316	1.55789	1.48306	0.966708
103621	SeMNPV_Til_103621	1.83829	1.45028	1.93706	1.74188	1.70513	2.89711	1.54324	2.0485	0.850322
103681	SeMNPV_Til_103681	1.45749	1.42319	1.41529	1.43199	1.48681	1.38542	1.40723	1.42649	1.00386
103741	SeMNPV_Til_103741	1.5641	1.60534	1.5503	1.57325	1.53209	1.57556	1.50421	1.53728	1.02339
103801	SeMNPV_Til_103801	1.55365	1.60874	1.55965	1.57402	1.46192	2.33436	1.52761	1.77463	0.886954
103861	SeMNPV_Til_103861	1.44341	1.36615	1.42692	1.41216	1.47315	1.30997	1.32836	1.37049	1.0304
103921	SeMNPV_Til_103921	1.42072	1.41387	1.48006	1.43821	1.39814	1.48415	1.41967	1.43399	1.00295
103981	SeMNPV_Til_103981	1.56408	1.54236	1.51369	1.54004	1.52004	1.55345	1.57737	1.55028	0.993394
104041	SeMNPV_Til_104041	2.15939	1.41037	1.46527	1.67834	4.24911	1.3217	1.66144	2.41075	0.696192
104101	SeMNPV_Til_104101	1.37346	1.43449	2.58294	1.79696	1.36587	1.40291	1.43338	1.40072	1.28289
104161	SeMNPV_Til_104161	1.51303	1.41425	1.51951	1.48226	1.55711	1.44902	1.41205	1.47273	1.00647
104221	SeMNPV_Til_104221	1.52981	1.44551	1.53607	1.5038	1.56727	1.47566	1.44078	1.49457	1.00617
104281	SeMNPV_Til_104281	1.52206	1.54825	1.51503	1.52845	1.50943	1.52747	1.48902	1.50864	1.01313
104341	SeMNPV_Til_104341	1.52954	1.51785	1.4837	1.51036	1.50643	1.51947	1.5466	1.52417	0.99094
104401	SeMNPV_Til_104401	3.67044	3.93467	3.27421	3.62644	3.93037	3.43692	3.51369	3.62699	0.999847
104461	SeMNPV_Til_104461	1.46609	1.50905	1.4387	1.47128	1.43586	1.48913	1.45041	1.45847	1.00879
104521	SeMNPV_Til_104521	1.46931	1.45946	1.422	1.45025	1.48793	1.427	1.44415	1.45303	0.998093
104581	SeMNPV_Til_104581	1.3252	1.36648	1.46619	1.38595	1.32409	1.4586	2.46534	1.74934	0.79227
104641	SeMNPV_Til_104641	3.43191	1.90093	1.78923	2.37402	3.15039	2.72626	3.63343	3.17003	0.748898
104701	SeMNPV_Til_104701	1.37314	3.19905	2.34742	2.30654	2.21011	2.70149	3.08666	2.66609	0.86514
104761	SeMNPV_Til_104761	1.49928	1.54773	1.63088	1.5593	1.47478	1.44024	1.47179	1.46227	1.06635
104821	SeMNPV_Til_104821	1.56577	1.53068	1.51453	1.53699	1.51725	1.55353	1.56098	1.54392	0.995514
104881	SeMNPV_Til_104881	1.39379	1.44956	1.34691	1.39675	1.37931	1.41708	1.42968	1.40869	0.991523
104941	SeMNPV_Til_104941	1.31329	1.35103	1.47272	1.37901	1.31225	1.45225	1.32029	1.3616	1.01279
105001	SeMNPV_Til_105001	1.52065	1.59009	1.50576	1.53883	1.72013	1.5501	1.47409	1.58144	0.973059
105061	SeMNPV_Til_105061	1.41282	1.43612	1.42015	1.42303	1.41398	1.44806	2.05394	1.63866	0.868412
105121	SeMNPV_Til_105121	1.50041	1.55944	1.47722	1.51236	1.44575	1.52788	1.4806	1.48474	1.0186
105181	SeMNPV_Til_105181	1.4224	3.10154	1.4138	1.97925	1.41802	1.44971	1.50934	1.45902	1.35656
105241	SeMNPV_Til_105241	1.79187	1.91013	1.73745	1.81315	1.60054	1.92338	1.75468	1.75953	1.03047
105301	SeMNPV_Til_105301	1.40209	1.44514	1.38262	1.40995	1.41629	1.43053	1.53238	1.45974	0.965892
105361	SeMNPV_Til_105361	1.41475	1.42049	1.36571	1.40032	1.43358	1.39748	1.42291	1.41799	0.987539
105421	SeMNPV_Til_105421	1.55013	1.55557	1.50356	1.53642	1.53154	1.5304	1.58634	1.54943	0.991605
105481	SeMNPV_Til_105481	2.64315	2.66895	1.37864	2.23024	1.39937	2.41802	3.74007	2.51915	0.885315
105541	SeMNPV_Til_105541	1.41477	1.40392	1.50197	1.44022	1.37632	1.49173	1.40024	1.42276	1.01227
105601	SeMNPV_Til_105601	1.56525	1.63105	1.55624	1.58418	1.46982	1.65675	1.52121	1.54926	1.02254
105661	SeMNPV_Til_105661	4.4771	1.35039	1.7431	2.52353	6.28242	1.37516	5.7631	4.47356	0.564099
105721	SeMNPV_Til_105721	1.45476	1.46994	1.43229	1.45233	1.45968	1.45758	1.44436	1.45388	0.998936
105781	SeMNPV_Til_105781	1.90439	1.41141	1.99117	1.76899	1.72255	1.45971	1.53394	1.57207	1.12527
105841	SeMNPV_Til_105841	1.50445	1.47634	1.46341	1.4814	1.53093	1.80856	1.40898	1.58282	0.935922
105901	SeMNPV_Til_105901	1.6103	1.61845	1.54945	1.59273	1.57768	1.60903	1.66704	1.61791	0.984436
105961	SeMNPV_Til_105961	1.4591	1.40525	1.44469	1.43635	4.61875	1.41322	1.40218	2.47805	0.579628
106021	SeMNPV_Til_106021	2.61708	1.68698	2.52727	2.27711	1.61018	3.55193	2.68829	2.6168	0.87019
106081	SeMNPV_Til_106081	1.47972	1.40103	1.46153	1.44743	1.48939	3.10082	1.66826	2.08616	0.693825
106141	SeMNPV_Til_106141	3.58182	3.47724	3.35032	3.46979	3.74445	3.23396	3.0034	3.32727	1.04283
106201	SeMNPV_Til_106201	1.45042	1.48608	1.43496	1.45715	1.42781	1.48006	1.51568	1.47451	0.988227
106261	SeMNPV_Til_106261	1.35361	2.72594	1.44798	1.84251	1.35629	1.45542	1.39334	1.40168	1.3145
106321	SeMNPV_Til_106321	3.87033	2.18842	1.48044	2.51307	1.43952	2.97307	1.42544	1.94601	1.29139
106381	SeMNPV_Til_106381	2.34767	1.58867	1.50508	1.81381	1.45472	1.55704	1.87196	1.62791	1.1142
106441	SeMNPV_Til_106441	1.59699	1.65264	1.58165	1.61043	1.67826	1.64036	1.49913	1.60592	1.00281
106501	SeMNPV_Til_106501	1.51758	1.55943	2.18482	1.75394	1.50312	1.46695	1.51777	1.49595	1.17246
106561	SeMNPV_Til_106561	5.08088	5.50991	5.1484	5.2464	4.92739	5.69641	5.13055	5.25145	0.999038
106621	SeMNPV_Til_106621	3.62392	3.32518	4.1775	3.70887	3.94165	4.56433	3.29854	3.93484	0.942572
106681	SeMNPV_Til_106681	1.40759	1.45985	1.36368	1.41038	1.38341	16.764	1.44249	6.52997	0.215985
106741	SeMNPV_Til_106741	2.24106	2.11515	1.43351	1.92991	5.13274	1.51052	1.67798	2.77374	0.695777
106801	SeMNPV_Til_106801	1.33804	1.36916	1.4746	1.39393	1.33533	1.4472	1.36111	1.38121	1.00921
106861	SeMNPV_Til_106861	3.5726	3.24125	3.26409	3.35931	3.84339	3.7658	2.22775	3.27898	1.0245
106921	SeMNPV_Til_106921	3.94997	3.59858	2.76257	3.43704	3.77026	3.3145	2.34984	3.14487	1.0929
106981	SeMNPV_Til_106981	1.57102	1.52721	1.51848	1.5389	1.51956	1.55685	1.55869	1.54503	0.996034
107041	SeMNPV_Til_107041	1.50754	1.53104	1.49718	1.51192	1.49441	1.51527	1.47614	1.49527	1.01113
107101	SeMNPV_Til_107101	1.43276	1.43239	1.38931	1.41815	1.44961	1.41172	1.43215	1.43116	0.990911
107161	SeMNPV_Til_107161	1.43327	1.42111	1.39314	1.41584	1.45858	1.39596	1.41544	1.42333	0.994738
107221	SeMNPV_Til_107221	1.51324	1.50693	1.46335	1.49451	1.50042	1.50034	1.5333	1.51135	0.988853
107281	SeMNPV_Til_107281	1.49755	1.55357	1.53991	1.53035	1.89131	1.63535	1.60093	1.7092	0.895361
107341	SeMNPV_Til_107341	1.61087	1.61383	1.60863	1.61111	1.57119	1.60208	1.53478	1.56935	1.02661
107401	SeMNPV_Til_107401	1.27667	1.2764	1.57333	1.37547	1.27144	1.50425	1.25146	1.34238	1.02465
107461	SeMNPV_Til_107461	1.53305	1.52875	1.48693	1.51624	1.51631	1.5181	1.55736	1.53059	0.990628
107521	SeMNPV_Til_107521	1.31306	1.35759	1.48026	1.38364	1.30772	1.47374	1.31394	1.36513	1.01355
107581	SeMNPV_Til_107581	1.4657	1.50785	1.43821	1.47059	1.43616	1.48771	1.44977	1.45788	1.00872
107641	SeMNPV_Til_107641	1.47965	3.27241	1.45228	2.06811	1.43535	1.50722	1.48235	1.47498	1.40213
107701	SeMNPV_Til_107701	1.63805	1.54596	1.55584	1.57995	1.56153	1.58892	1.60863	1.58636	0.995957
107761	SeMNPV_Til_107761	3.54328	3.80195	3.40356	3.58293	3.66368	4.13777	3.39931	3.73359	0.959647
107821	SeMNPV_Til_107821	1.67423	1.52436	1.57345	1.59068	1.61394	1.59281	1.60722	1.60465	0.991293
107881	SeMNPV_Til_107881	2.48977	2.53977	1.72188	2.25047	3.16528	2.64544	2.19131	2.66734	0.843713
107941	SeMNPV_Til_107941	5.44917	3.73365	4.30292	4.49525	4.56152	5.02651	5.3475	4.97851	0.90293
108001	SeMNPV_Til_108001	1.36395	1.4252	1.62665	1.47194	1.36415	1.38837	2.62501	1.79251	0.821161
108061	SeMNPV_Til_108061	1.57581	1.59991	1.53046	1.56873	1.5625	1.58221	1.65843	1.60105	0.979812
108121	SeMNPV_Til_108121	1.48334	1.53541	1.45677	1.49184	1.44013	1.50911	1.46251	1.47058	1.01446
108181	SeMNPV_Til_108181	1.4173	1.43597	1.36565	1.4063	1.41016	1.42113	1.44378	1.42502	0.986864
108241	SeMNPV_Til_108241	1.53226	1.59862	1.52427	1.55171	1.46003	1.59397	1.52194	1.52531	1.01731
108301	SeMNPV_Til_108301	1.53794	1.58837	1.50628	1.5442	1.5083	1.52176	1.88101	1.63702	0.943297
108361	SeMNPV_Til_108361	4.5292	4.27758	4.93024	4.57901	4.3135	4.8181	4.57109	4.56756	1.0025
108421	SeMNPV_Til_108421	1.4138	1.46166	1.37724	1.41757	1.39653	1.43079	4.26684	2.36472	0.599465
108481	SeMNPV_Til_108481	1.44554	1.4385	1.50637	1.46347	1.41124	1.51016	1.43421	1.45187	1.00799
108541	SeMNPV_Til_108541	1.59743	1.42961	1.6255	1.55085	1.83492	1.48192	1.44426	1.58704	0.977197
108601	SeMNPV_Til_108601	3.4512	2.62641	3.37478	3.1508	1.45967	1.38969	2.61157	1.82031	1.73091
108661	SeMNPV_Til_108661	1.51042	1.51342	1.56086	1.52823	1.43388	1.62539	1.47807	1.51244	1.01044
108721	SeMNPV_Til_108721	1.4888	1.45057	1.44794	1.46244	1.51661	1.39674	1.39925	1.43753	1.01732
108781	SeMNPV_Til_108781	1.44452	1.4136	1.40669	1.4216	2.3387	1.37952	1.40627	1.70816	0.832241
108841	SeMNPV_Til_108841	2.72997	3.2393	2.43863	2.80263	2.3758	3.84805	3.17192	3.13192	0.89486
108901	SeMNPV_Til_108901	1.44711	1.33047	1.63922	1.47227	1.57447	4.36755	2.71248	2.88483	0.510348
108961	SeMNPV_Til_108961	1.62637	1.43035	1.6645	1.57374	1.77211	1.48461	1.45425	1.57033	1.00217
109021	SeMNPV_Til_109021	2.55772	2.9407	3.84291	3.11378	3.35032	3.68332	3.02611	3.35325	0.928585
109081	SeMNPV_Til_109081	2.77427	1.46758	1.44324	1.89503	1.42594	1.47791	1.50435	1.4694	1.28966
109141	SeMNPV_Til_109141	1.36615	1.40485	1.43606	1.40235	1.38143	1.45217	1.42257	1.41872	0.988464
109201	SeMNPV_Til_109201	1.35113	1.39415	1.45815	1.40114	1.34901	2.22259	1.38675	1.65278	0.847747
109261	SeMNPV_Til_109261	1.46982	2.96669	3.05276	2.49643	1.43655	3.22226	1.5217	2.06017	1.21176
109321	SeMNPV_Til_109321	1.42516	1.46497	2.53132	1.80715	3.10745	1.46683	1.56629	2.04686	0.88289
109381	SeMNPV_Til_109381	1.64084	1.71798	1.6494	1.66941	1.79341	1.86337	1.48507	1.71395	0.974012
109441	SeMNPV_Til_109441	1.37324	3.12434	1.9298	2.14246	1.83573	2.67575	2.09689	2.20279	0.972612
109501	SeMNPV_Til_109501	1.38723	1.44638	1.84238	1.55866	1.37324	1.41394	1.439	1.40873	1.10644
109561	SeMNPV_Til_109561	1.65536	1.75393	2.40111	1.9368	3.44011	1.79119	1.70981	2.3137	0.837101
109621	SeMNPV_Til_109621	1.38534	4.8342	1.34259	2.52071	1.39282	1.41408	1.48978	1.43223	1.75999
109681	SeMNPV_Til_109681	1.48988	1.39808	1.49407	1.46068	1.54041	1.42013	1.39433	1.45162	1.00624
109741	SeMNPV_Til_109741	1.66636	1.6568	1.58481	1.63599	1.60247	2.47249	1.69042	1.92179	0.851284
109801	SeMNPV_Til_109801	1.45599	1.44354	1.52597	1.47517	1.40624	1.52968	1.42541	1.45378	1.01472
109861	SeMNPV_Til_109861	4.77247	4.04085	3.21833	4.01055	3.83394	3.73485	3.9257	3.8315	1.04673
109921	SeMNPV_Til_109921	2.84214	5.00244	3.41839	3.75433	2.62501	4.65377	3.09068	3.45649	1.08617
109981	SeMNPV_Til_109981	1.91768	1.51708	1.55471	1.66316	1.5475	1.59013	1.58007	1.57257	1.05761
110041	SeMNPV_Til_110041	2.53945	1.45768	1.40425	1.80046	1.86101	2.29832	3.00484	2.38806	0.753942
110101	SeMNPV_Til_110101	2.66649	2.34255	3.40105	2.80336	3.71898	2.35931	2.85104	2.97645	0.941849
110161	SeMNPV_Til_110161	1.41513	1.45398	1.40662	1.42525	1.95206	1.45156	2.54155	1.98172	0.719196
110221	SeMNPV_Til_110221	1.45036	1.4433	1.51311	1.46892	1.41223	1.51618	1.43454	1.45432	1.01004
110281	SeMNPV_Til_110281	1.35289	1.39248	1.44873	1.39804	1.35523	1.4617	1.39293	1.40329	0.996257
110341	SeMNPV_Til_110341	1.51372	1.50302	1.46651	1.49442	1.53265	1.4618	1.48106	1.49183	1.00173
110401	SeMNPV_Til_110401	2.60483	2.20237	1.41996	2.07572	1.41983	2.4205	1.94729	1.92921	1.07594
110461	SeMNPV_Til_110461	3.21238	2.33036	3.61813	3.05362	3.02979	3.01148	2.43618	2.82581	1.08062
110521	SeMNPV_Til_110521	1.50236	2.88665	2.47155	2.28685	1.47357	1.5173	2.78394	1.92494	1.18802
110581	SeMNPV_Til_110581	1.51984	1.52115	1.586	1.54233	1.42754	1.67282	2.3078	1.80272	0.855558
110641	SeMNPV_Til_110641	2.94877	2.45552	2.52034	2.64154	3.77579	4.14524	4.06951	3.99685	0.660907
110701	SeMNPV_Til_110701	1.39739	3.55258	1.3809	2.11029	2.51342	2.68225	1.51978	2.23848	0.942732
110761	SeMNPV_Til_110761	1.44688	1.38203	1.4221	1.41701	1.48227	1.33254	1.35943	1.39141	1.01839
110821	SeMNPV_Til_110821	2.22417	1.50508	1.62622	1.78516	1.51515	3.62551	2.79847	2.64637	0.674568
110881	SeMNPV_Til_110881	1.43446	1.47353	1.47254	1.46018	1.43343	1.51967	1.53369	1.4956	0.976317
110941	SeMNPV_Til_110941	1.4753	1.46772	1.42798	1.457	1.49331	1.43366	1.45147	1.45948	0.998304
111001	SeMNPV_Til_111001	1.52679	1.52745	1.48028	1.5115	1.52964	1.49997	1.54914	1.52625	0.990337
111061	SeMNPV_Til_111061	1.46833	1.44644	1.42316	1.44598	1.49395	1.41344	1.42061	1.44267	1.0023
111121	SeMNPV_Til_111121	1.35247	1.36787	1.51568	1.41201	1.33363	1.47684	1.35785	1.38944	1.01624
111181	SeMNPV_Til_111181	1.48489	1.53875	1.56212	1.52859	1.42789	1.68503	1.50518	1.53937	0.992998
111241	SeMNPV_Til_111241	1.58867	1.53087	1.5293	1.54961	1.52346	1.57551	1.56965	1.5562	0.995766
111301	SeMNPV_Til_111301	1.43035	1.44627	1.38454	1.42039	1.42281	1.43192	1.44982	1.43485	0.98992
111361	SeMNPV_Til_111361	1.58707	1.52789	1.78321	1.63272	2.23988	1.56815	1.56348	1.79051	0.911878
111421	SeMNPV_Til_111421	1.40994	1.44917	1.39361	1.41757	1.41032	1.43356	1.51068	1.45152	0.97661
111481	SeMNPV_Til_111481	1.46984	1.49978	1.4467	1.47211	1.4545	1.48453	1.45274	1.46392	1.00559
111541	SeMNPV_Til_111541	1.63748	1.6146	1.64442	1.63217	1.59044	1.61083	1.54555	1.58227	1.03153
111601	SeMNPV_Til_111601	1.51469	1.56537	1.50115	1.52707	1.47516	1.53277	1.47149	1.49314	1.02272
111661	SeMNPV_Til_111661	1.34414	1.38307	1.4536	1.39361	1.34653	1.4564	1.3809	1.39461	0.999279
111721	SeMNPV_Til_111721	1.49095	1.48301	1.44282	1.47226	1.50637	1.44837	1.46987	1.47487	0.998228
111781	SeMNPV_Til_111781	1.47843	1.51747	1.45453	1.48348	1.44958	2.70693	1.91275	2.02309	0.733273
111841	SeMNPV_Til_111841	4.43201	3.58522	3.7551	3.92411	3.82226	4.6671	3.2064	3.89859	1.00655
111901	SeMNPV_Til_111901	1.46507	1.37996	1.4461	1.43038	1.47941	1.28855	1.30429	1.35742	1.05375
111961	SeMNPV_Til_111961	1.42074	1.42798	2.57165	1.80679	1.43537	1.40791	1.42996	1.42442	1.26844
112021	SeMNPV_Til_112021	3.72999	1.44098	1.4155	2.19549	1.42124	1.45829	1.52807	1.4692	1.49434
112081	SeMNPV_Til_112081	1.71432	1.69986	1.72854	1.71424	1.58679	1.72533	1.52681	1.61298	1.06278
112141	SeMNPV_Til_112141	1.51562	1.56689	1.51634	1.53295	1.82036	1.578	1.64091	1.67976	0.912604
112201	SeMNPV_Til_112201	1.47456	1.51847	1.44808	1.48037	1.44009	1.49788	1.45428	1.46408	1.01112
112261	SeMNPV_Til_112261	1.57776	1.4754	1.5864	1.54652	1.59532	1.50314	1.48124	1.52657	1.01307
112321	SeMNPV_Til_112321	5.578	5.87612	5.8942	5.78278	6.08742	5.74746	5.89183	5.9089	0.978655
112381	SeMNPV_Til_112381	1.49293	1.51677	2.47249	1.8274	3.05519	2.63825	1.62165	2.43836	0.749436
112441	SeMNPV_Til_112441	1.72294	1.80407	1.75668	1.76123	1.52337	1.98586	1.45081	1.65335	1.06525
112501	SeMNPV_Til_112501	1.586	1.55856	1.52761	1.55739	1.55587	1.56086	1.62321	1.57998	0.985706
112561	SeMNPV_Til_112561	1.56657	1.40808	1.58534	1.52	1.5951	1.46114	1.41208	1.48944	1.02052
112621	SeMNPV_Til_112621	1.54978	1.56629	1.50537	1.54048	1.5387	1.5232	1.59033	1.55074	0.993383
112681	SeMNPV_Til_112681	1.59003	1.63437	1.63097	1.61846	1.45425	2.40163	1.5013	1.78573	0.906327
112741	SeMNPV_Til_112741	1.52517	1.51042	1.48119	1.50559	1.50427	1.51785	1.57238	1.5315	0.983085
112801	SeMNPV_Til_112801	1.45425	1.4562	1.50083	1.47043	1.42132	1.51131	1.45281	1.46181	1.00589
112861	SeMNPV_Til_112861	1.4361	1.47578	1.44564	1.45251	1.71741	1.49651	1.57451	1.59614	0.910009
112921	SeMNPV_Til_112921	1.55503	1.52581	1.55035	1.54373	1.56252	1.52721	1.51629	1.53534	1.00546
112981	SeMNPV_Til_112981	1.39018	1.44227	1.35407	1.39551	1.39352	1.41618	1.4892	1.43297	0.973858
113041	SeMNPV_Til_113041	1.68604	1.76047	1.68935	1.71195	1.54327	1.83231	1.47442	1.61667	1.05894
113101	SeMNPV_Til_113101	1.53338	1.58271	1.77125	1.62911	1.77646	1.50618	1.59013	1.62426	1.00299
113161	SeMNPV_Til_113161	3.21607	1.51961	1.45583	2.06384	1.43681	1.50773	1.51032	1.48495	1.38983
113221	SeMNPV_Til_113221	1.58656	1.56073	1.52802	1.55844	1.5568	1.56152	1.62503	1.58111	0.985658
113281	SeMNPV_Til_113281	1.78352	1.42067	1.89948	1.70122	1.6969	1.47683	1.51427	1.56267	1.08867
113341	SeMNPV_Til_113341	1.90318	1.77002	2.66798	2.11372	1.74647	2.15527	2.38836	2.0967	1.00812
113401	SeMNPV_Til_113401	1.39682	1.44107	1.35616	1.39802	1.40571	1.41864	1.50771	1.44402	0.968143
113461	SeMNPV_Til_113461	1.55353	1.57562	1.50937	1.54618	1.53554	1.52908	1.59847	1.55436	0.994733
113521	SeMNPV_Til_113521	1.95169	1.74033	1.99276	1.89493	1.56911	3.0268	2.75996	2.45196	0.772822
113581	SeMNPV_Til_113581	1.51389	1.56743	1.4987	1.52667	2.67005	1.53394	2.50671	2.2369	0.682495
113641	SeMNPV_Til_113641	1.48255	1.50549	1.4918	1.49328	1.44114	1.52436	1.52059	1.49536	0.998608
113701	SeMNPV_Til_113701	2.1073	1.63514	1.5446	1.76235	2.17981	1.63218	1.5032	1.77173	0.994705
113761	SeMNPV_Til_113761	1.48294	1.52606	1.5152	1.50807	1.62357	1.57874	1.60344	1.60192	0.941414
113821	SeMNPV_Til_113821	1.36122	1.38271	1.49177	1.4119	1.35188	1.47059	1.78218	1.53488	0.919874
113881	SeMNPV_Til_113881	1.9238	1.58923	1.93657	1.81653	1.99857	2.9714	2.19578	2.38858	0.760507
113941	SeMNPV_Til_113941	1.37289	3.09278	1.27223	1.91263	1.3746	1.3922	1.43251	1.39977	1.36639
114001	SeMNPV_Til_114001	1.8896	1.56136	1.94096	1.79731	1.69166	1.58162	1.58165	1.61831	1.11061
114061	SeMNPV_Til_114061	1.38573	1.41942	1.45519	1.42012	1.38714	1.49167	1.43329	1.43737	0.987999
114121	SeMNPV_Til_114121	1.39818	1.44253	1.38012	1.40694	1.40752	1.42627	1.51552	1.44977	0.970458
114181	SeMNPV_Til_114181	1.54275	1.56534	1.50233	1.53681	1.54178	1.50455	1.57102	1.53912	0.998499
114241	SeMNPV_Til_114241	5.24028	4.40614	5.12097	4.92246	4.71607	5.55501	4.53233	4.93447	0.997566
114301	SeMNPV_Til_114301	1.4148	1.45216	1.37768	1.41488	2.39229	1.43134	1.53127	1.78496	0.792666
114361	SeMNPV_Til_114361	1.40716	1.44047	1.40329	1.41697	1.41309	1.43713	1.50928	1.45316	0.975095
114421	SeMNPV_Til_114421	2.48746	1.444	1.38977	1.77374	1.8184	1.43358	1.5329	1.59496	1.11209
114481	SeMNPV_Til_114481	2.3978	2.10373	2.78126	2.4276	1.91506	4.04054	1.49983	2.48514	0.976845
114541	SeMNPV_Til_114541	1.57199	2.16928	2.22974	1.99034	1.67207	1.56303	1.58358	1.60623	1.23914
114601	SeMNPV_Til_114601	1.41074	1.42606	1.35518	1.39733	1.41939	1.40636	1.42834	1.41803	0.985399
114661	SeMNPV_Til_114661	1.95605	3.12509	1.47417	2.1851	1.35833	3.04472	2.66288	2.35531	0.927736
114721	SeMNPV_Til_114721	1.42113	2.1638	1.38736	1.65743	1.42759	1.43757	1.54011	1.46843	1.12871
114781	SeMNPV_Til_114781	1.55099	1.60604	1.55635	1.57113	1.46158	1.652	1.52826	1.54728	1.01541
114841	SeMNPV_Til_114841	1.47959	1.53017	1.45165	1.48714	1.43619	1.50599	1.46638	1.46952	1.01199
114901	SeMNPV_Til_114901	1.43421	1.40444	1.631	1.48988	1.31394	1.71838	1.37852	1.47028	1.01333
114961	SeMNPV_Til_114961	6.21556	7.01167	7.79879	7.00868	7.33697	7.88475	7.18749	7.46973	0.938277
115021	SeMNPV_Til_115021	2.60235	1.90166	1.73525	2.07975	2.3313	1.82506	1.79481	1.98372	1.04841
115081	SeMNPV_Til_115081	1.56941	1.56388	1.5204	1.55123	2.11534	1.56763	1.60563	1.76287	0.879947
115141	SeMNPV_Til_115141	1.82874	1.81063	1.87712	1.83883	1.56082	1.98608	1.44328	1.66339	1.10547
115201	SeMNPV_Til_115201	1.43753	1.46627	1.44147	1.44842	1.42532	1.47562	1.50375	1.46823	0.986509
115261	SeMNPV_Til_115261	2.60768	1.49647	1.46554	1.85656	1.46024	1.51714	1.59831	1.52523	1.21723
115321	SeMNPV_Til_115321	1.49096	2.07892	1.64112	1.737	1.34495	1.78785	1.40512	1.51264	1.14833
115381	SeMNPV_Til_115381	1.50428	1.50317	1.56268	1.52338	1.42736	1.62345	1.46471	1.50517	1.0121
115441	SeMNPV_Til_115441	1.54698	1.51615	1.5005	1.52121	1.5079	1.53475	1.54592	1.52952	0.994566
115501	SeMNPV_Til_115501	1.40516	1.43714	1.40703	1.41644	1.41298	2.26867	1.50524	1.72896	0.819247
115561	SeMNPV_Til_115561	1.4132	1.97322	1.43307	1.6065	1.42365	1.47729	1.52406	1.475	1.08915
115621	SeMNPV_Til_115621	1.7631	1.5917	1.83383	1.72954	1.66019	1.60644	1.57542	1.61402	1.07157
115681	SeMNPV_Til_115681	2.49252	1.54345	1.9114	1.98246	1.8455	4.06882	3.56846	3.16093	0.627177
115741	SeMNPV_Til_115741	1.74594	1.5654	1.81963	1.71032	1.66367	1.58004	1.57378	1.60583	1.06507
115801	SeMNPV_Til_115801	1.91743	1.7621	1.94676	1.87543	1.58631	1.93521	1.44744	1.65632	1.13229
115861	SeMNPV_Til_115861	1.52409	1.55611	1.49858	1.52626	1.53158	1.54311	1.63909	1.57126	0.971362
115921	SeMNPV_Til_115921	2.78938	2.31783	2.24782	2.45168	2.10867	3.38379	2.91543	2.80263	0.874776
115981	SeMNPV_Til_115981	1.36587	1.4191	1.25078	1.34525	1.37274	1.38284	1.41858	1.39139	0.966838
116041	SeMNPV_Til_116041	1.4656	1.50734	1.43939	1.47078	1.42988	3.00035	2.27519	2.23514	0.658024
116101	SeMNPV_Til_116101	2.14234	2.20517	1.62517	1.99089	2.8114	1.47149	1.45996	1.91428	1.04002
116161	SeMNPV_Til_116161	1.39082	1.44898	3.16651	2.0021	1.37578	2.23665	1.44122	1.68455	1.18851
116221	SeMNPV_Til_116221	1.65139	1.39708	1.71985	1.58944	1.65293	1.45106	1.42188	1.50862	1.05357
116281	SeMNPV_Til_116281	2.51971	2.54861	1.26712	2.11181	1.36787	3.20424	1.62655	2.06622	1.02207
116341	SeMNPV_Til_116341	1.32559	1.35685	1.47665	1.38636	1.32484	1.44185	1.34237	1.36969	1.01218
116401	SeMNPV_Til_116401	1.62513	1.74199	1.65429	1.6738	1.55353	1.8778	1.67787	1.70307	0.982817
116461	SeMNPV_Til_116461	1.87211	1.68027	1.91246	1.82161	1.63514	1.72867	1.53928	1.63436	1.11457
116521	SeMNPV_Til_116521	3.31678	3.08088	1.69909	2.69892	3.50454	4.07116	3.01909	3.5316	0.764219
116581	SeMNPV_Til_116581	1.32068	3.07809	2.17723	2.192	3.77097	3.74129	1.60609	3.03945	0.721184
116641	SeMNPV_Til_116641	1.62565	1.66083	1.70159	1.66269	1.4405	2.04375	1.45209	1.64545	1.01048
116701	SeMNPV_Til_116701	1.44417	1.48925	1.41483	1.44942	1.4224	1.46584	1.44204	1.44343	1.00415
116761	SeMNPV_Til_116761	3.37917	2.00323	3.3632	2.9152	2.34004	2.92003	2.70512	2.65506	1.09798
116821	SeMNPV_Til_116821	1.35039	1.36317	1.53145	1.415	1.32684	1.49005	1.34866	1.38852	1.01908
116881	SeMNPV_Til_116881	1.81787	1.47752	1.90777	1.73439	1.6964	1.51274	1.55345	1.58753	1.09251
116941	SeMNPV_Til_116941	2.63549	1.49415	1.43666	1.85543	1.46759	1.49008	1.60251	1.52006	1.22063
117001	SeMNPV_Til_117001	1.53667	1.54704	1.4929	1.52553	2.37779	1.5006	2.60725	2.16188	0.705651
117061	SeMNPV_Til_117061	2.16604	1.42346	3.48929	2.3596	1.60748	4.45395	3.19373	3.08505	0.764849
117121	SeMNPV_Til_117121	3.22981	1.46727	1.43427	2.04378	1.38852	2.28407	1.43318	1.70192	1.20087
117181	SeMNPV_Til_117181	3.29748	1.43278	1.32713	2.01913	1.39141	1.41049	2.69923	1.83371	1.10112
117241	SeMNPV_Til_117241	1.61495	1.68087	1.62475	1.64019	1.47746	1.81077	1.50291	1.59705	1.02702
117301	SeMNPV_Til_117301	1.57056	1.64084	1.55178	1.58773	1.49696	1.62374	1.48608	1.53559	1.03395
117361	SeMNPV_Til_117361	1.44009	1.35744	1.43404	1.41052	1.47335	1.31615	2.39632	1.72861	0.815989
117421	SeMNPV_Til_117421	1.38392	1.41883	1.32599	1.37625	1.40193	1.39073	1.70776	1.50014	0.917414
117481	SeMNPV_Til_117481	2.10045	1.62513	2.07212	1.93257	1.67461	1.67529	2.42921	1.92637	1.00322
117541	SeMNPV_Til_117541	2.80648	1.65855	1.58275	2.01593	1.60071	1.65025	1.69087	1.64728	1.22379
117601	SeMNPV_Til_117601	1.53379	1.60308	1.52	1.55229	1.47643	1.56512	1.47692	1.50615	1.03063
117661	SeMNPV_Til_117661	2.83847	2.25301	3.3004	2.79729	2.93806	3.68547	2.02507	2.88287	0.970316
117721	SeMNPV_Til_117721	3.53099	2.81924	1.50793	2.61939	4.47785	3.43404	3.07401	3.66197	0.715295
117781	SeMNPV_Til_117781	12.2404	11.8541	12.2072	12.1006	11.787	12.4181	11.9001	12.0351	1.00544
117841	SeMNPV_Til_117841	1.5945	1.6462	2.56037	1.93369	1.65307	2.51361	1.50729	1.89132	1.0224
117901	SeMNPV_Til_117901	1.42235	1.45891	1.44259	1.44128	1.43097	1.48983	1.53851	1.48644	0.969621
117961	SeMNPV_Til_117961	1.40083	1.43681	1.52968	1.45578	1.33928	1.59606	1.37931	1.43822	1.01221
118021	SeMNPV_Til_118021	3.04349	1.52619	2.26867	2.27945	2.54217	2.11362	1.71064	2.12214	1.07413
118081	SeMNPV_Til_118081	1.52688	1.59493	1.51329	1.54503	1.47215	1.55624	2.46339	1.83059	0.844005
118141	SeMNPV_Til_118141	1.49829	1.47462	1.48161	1.48484	1.49932	1.35936	1.36986	1.40952	1.05344
118201	SeMNPV_Til_118201	3.33939	3.25219	3.14415	3.24524	2.24841	2.68078	3.19264	2.70727	1.19871
118261	SeMNPV_Til_118261	1.39561	1.44135	2.20913	1.68203	1.47582	1.41925	1.5127	1.46926	1.14482
118321	SeMNPV_Til_118321	1.47782	1.42571	1.44011	1.44788	1.86906	1.37509	1.38919	1.54445	0.937473
118381	SeMNPV_Til_118381	1.66921	2.24309	1.69016	1.86749	1.78269	1.94024	1.93791	1.88695	0.989687
118441	SeMNPV_Til_118441	1.48232	1.503	1.44695	1.47742	1.48218	1.49857	1.60582	1.52885	0.96636
118501	SeMNPV_Til_118501	1.48174	1.42289	1.44535	1.44999	1.51021	1.36748	1.38181	1.41983	1.02124
118561	SeMNPV_Til_118561	1.55387	1.58435	1.51236	1.55019	1.52274	1.53777	1.61063	1.55704	0.995597
118621	SeMNPV_Til_118621	3.16114	1.42332	1.26754	1.95067	1.37097	1.38817	1.41894	1.39269	1.40064
118681	SeMNPV_Til_118681	1.97904	1.49633	2.0122	1.82919	1.71729	1.52424	1.57599	1.60584	1.13908
118741	SeMNPV_Til_118741	5.45724	4.64049	4.76205	4.95326	4.74619	5.53577	4.92478	5.06891	0.977184
118801	SeMNPV_Til_118801	1.41106	2.07631	1.37448	1.62062	1.39682	2.76549	3.47701	2.54644	0.636425
118861	SeMNPV_Til_118861	2.26606	2.56884	3.21532	2.68341	2.23138	3.04738	3.33425	2.871	0.934658
118921	SeMNPV_Til_118921	1.5479	1.6224	1.53255	1.56761	1.46784	1.61279	1.50624	1.52896	1.02528
118981	SeMNPV_Til_118981	1.66443	1.52892	1.56835	1.58724	1.56294	1.59429	1.60531	1.58751	0.999824
119041	SeMNPV_Til_119041	1.45289	1.38742	1.42433	1.42155	1.4864	1.33603	1.36097	1.39447	1.01942
119101	SeMNPV_Til_119101	1.46591	1.40246	2.68286	1.85041	1.4975	1.35321	1.80331	1.55134	1.19278
119161	SeMNPV_Til_119161	1.37881	1.3875	1.50144	1.42258	1.35578	1.4804	3.62682	2.15434	0.660335
119221	SeMNPV_Til_119221	1.51858	1.51133	1.47287	1.50093	1.53678	1.47033	1.50021	1.50244	0.998992
119281	SeMNPV_Til_119281	1.42299	1.41531	1.46609	1.4348	2.88237	1.38855	3.50493	2.59195	0.55356
119341	SeMNPV_Til_119341	1.41645	1.98023	2.84823	2.08164	1.39596	1.43347	1.43343	1.42095	1.46496
119401	SeMNPV_Til_119401	1.70038	1.36377	1.85453	1.63956	1.68154	1.38241	1.40313	1.48903	1.1011
119461	SeMNPV_Til_119461	1.59013	1.59185	1.58312	1.58837	1.56634	1.57278	1.53172	1.55695	1.02018
119521	SeMNPV_Til_119521	1.77621	1.81685	1.85421	1.81576	1.52187	2.06009	1.42861	1.67019	1.08716
119581	SeMNPV_Til_119581	1.55278	1.54319	1.50545	1.53381	1.52202	1.53924	1.57759	1.54629	0.99193
119641	SeMNPV_Til_119641	1.37193	2.04134	1.43177	1.61501	1.38906	1.45613	1.43838	1.42786	1.13108
119701	SeMNPV_Til_119701	1.51615	1.4565	1.51904	1.49723	1.55514	1.47656	1.44693	1.49288	1.00292
119761	SeMNPV_Til_119761	1.77627	2.00976	1.8963	1.89411	2.30938	1.4701	1.50098	1.76015	1.0761
119821	SeMNPV_Til_119821	1.55826	1.62418	1.55013	1.57752	1.46753	1.6462	1.52337	1.5457	1.02059
[truncated: 262 more rows]
