# Supplementary material for: Iflavirus increases its infectivity and physical stability in association with baculovirus
Source: PeerJ. 2016 Mar 3;4:e1687. doi: 10.7717/peerj.1687 (PMC4782719; doi:10.7717/peerj.1687)
Supplement: Supplemental Information 2 [file peerj-04-1687-s002.xlsx]

## Sheet: Fig 2A
SeIV1	SeMNPV-SeIV1
-19.67	-19.1
-18.56	-17.6
-18.46	-17.51
-18.58	-16.42
-18.79	-18.68
-17.99	-17.35
-16.72	-15.32
-17.81	-17.96
-19.76	-13.4
-19.36	-18.4245

## Sheet: Fig 2B
SeMNPV			SeMNPV-SeIV1
Mean	Upper-limit	Lower limit	Mean	Upper-limit	Lower limit
15525	19921	11987	26014	33235	20335

## Sheet: Fig 2C
Time	% mortality SeMNPV	% Mortality SeMNPV+SeIV1
24	0	1.45
32	0	1.45
40	0	1.45
48	3.75	2.9
56	3.75	2.9
64	6.25	2.9
72	10	2.9
80	10	2.9
88	21.25	10.3
96	67.5	72.4
104	90	86.95
112	95	94.2
120	97.5	97.1
128	98.75	98.5
136	100	98.5
144	100	100

## Sheet: Fig 2E
Energy	OBs		purIV
0	100	100	100	100
3	14.3587	4.21011	0.342424	0.0309023
6	3.125	1.12807	0.0568718	0.00516812
9	4.09498	1.68629	0.0592869	0.00446804
12	2.35195	1.43779	0.0166753	0.00569478

## Sheet: Fig 2F
Time	OBs		purIV
0.1	100	100	100	100
0.5	48.6328	169.349	46.9761	60.2904
1	71.6978	118.099		2.93601
6	28.5191	82.3591	0.0740096	0.113743
24	0.0700174	0.152181	0.00606136	0.0278507
